# Supplementary material for: Multi-compartmental diversification of neutralizing antibody lineages dissected in SARS-CoV-2 spike-immunized macaques
Source: Research Square preprint supplement (doi:10.21203/rs.3.rs-3958951/v1), 2024-02-26
Supplement: Supplementary file 3 [file 89db2fff4757afc682645949.xlsx]

## Sheet: Cryo-EM data summary
	SARS-CoV-2 Spike + Fab mAb 23	RBD + Fab mAb 23
	(EMDB: 18180)	(EMDB: 17451)
	(PDB: 8Q5Y)	(PDB: 8P5M)
Data collection and processing
Magnification (nominal)	165000
Voltage (kV)	300
Electron exposure (e–/Å2)	54.6
Underfocus range (μm)	0.3–2
Pixel size (Å)	0.505
Symmetry imposed	C1
Initial particle images (no.)	439641
Final particle images (no.)	135612	135612
Map resolution (Å)	2.45	2.88
FSC threshold	0.143	0.143
Refinement
Initial model used (PDB code)	7A25	7A25
Map sharpening B factor (Å2)	107.1	142
Model composition
Non-hydrogen atoms	30930	3260
Protein residues	3873	419
Ligands	52 NAG	1 NAG
B factors (Å2)
Protein	80.67	84.9
Ligand	104.08	-
R.m.s. deviations
Bond lengths (Å)	0.007	0.005
Bond angles (°)	0.678	1.042
Validation
MolProbity score1	1.47	1.37
Clashscore1	8.79	3.6
Poor rotamers (%)	0	0
Ramachandran plot2
Favored (%)	98.42	96.61
Allowed (%)	1.52	3.39
Disallowed (%)	0.05	0
