# Supplementary material for: Multi-compartmental diversification of neutralizing antibody lineages dissected in SARS-CoV-2 spike-immunized macaques
Source: Research Square preprint supplement (doi:10.21203/rs.3.rs-3958951/v1), 2024-02-26
Supplement: Supplementary file 4 [file 96b5fb24c9211abfc532c58d.xlsx]

## Sheet: Library_info_summary
Library	Total merged reads	Post-FAD	Post-CHIMERA	Chimeric %
H03-post1-blood	4692584	6327	6193	2.11791
H03-post2-BM	3221169	16594	16140	2.73593
H03-post2-iLN	3544903	16503	16098	2.4541
H03-post2-blood	4590184	7890	7744	1.85044
H03-post3-BM	5073720	19813	19240	2.89204
H03-post3-iLN	3067779	3668	3508	4.36205
H03-post3-blood	6479579	5329	5212	2.19553
H03-post3.19w-blood	1727719	5000	4922	1.56
H03-post3.23w-blood	2567793	7734	7604	1.68089
H03-post3.27w-blood	3738908	7009	6899	1.56941
H03-post4-BM	4186761	13153	11465	12.8336
H03-post4-axLN	1954733	7930	7703	2.86255
H03-post4-mesLN	1077148	16044	15683	2.25006
H03-post4-perLN	1472563	8607	8428	2.0797
H03-post4-spleen	1435711	4560	4054	11.0965
I10-post1-blood	4533604	9903	9655	2.50429
I10-post2-BM	3008350	63569	61523	3.21855
I10-post2-iLN	4457238	11514	11038	4.1341
I10-post2-blood	4847225	4527	4390	3.02629
I10-post3-BM	4397414	39471	38091	3.49624
I10-post3-iLN	5273030	9804	9463	3.47817
I10-post3-blood	4639468	6200	6049	2.43548
I10-post3.19w-blood	2322594	4506	4406	2.21926
I10-post3.23w-blood	2005041	4964	4851	2.27639
I10-post3.27w-blood	2370272	4550	4408	3.12088
I10-post4-BM	2652688	10120	9824	2.9249
I10-post4-iLN-L	2309079	4416	4322	2.12862
I10-post4-iLN-R	4159311	9604	9400	2.12411
I10-post4-spleen	2580445	6243	6020	3.572
I10-post4-blood	1849560	5826	5666	2.74631
