# Supplementary material for: Multi-compartmental diversification of neutralizing antibody lineages dissected in SARS-CoV-2 spike-immunized macaques
Source: Research Square preprint supplement (doi:10.21203/rs.3.rs-3958951/v1), 2024-02-26
Supplement: Supplementary file 6 [file a25c36826b4308796a8cd7e1.xlsx]

## Sheet: H03_IGH
Allele	Sequence (NT)	Sequence (AA)
IGHV1-124*01	CAGGTGCAGCTGGTGCAGTCTGGGGCTGAGATTAAGCAGCCTGGGGCCTCAGTGAAGCTCTCCTGCAAGGCTTCTGGATATACCTTCACTAGCTACTACATGCACTGGGTGAGACAGGCCCCTGGACAAGGCCTTGAGTGGATAGGACTGATCTCCCCTTACAATGGTAACAAAGGCTACGCACAGAACTTCCAGGGCAGAGTCACCATAACTACGGACACGTCCACGAGCACAGGCTACATGGAGCTGAGCAGCCTGAGATCTGAGGACACAGCCGTGTATTACTGTACGAGAGA	QVQLVQSGAEIKQPGASVKLSCKASGYTFTSYYMHWVRQAPGQGLEWIGLISPYNGNKGYAQNFQGRVTITTDTSTSTGYMELSSLRSEDTAVYYCTR
IGHV1-138*01_S1600	CAGGTCCAGCTGGTGCAGTCCGGGGCTGAGGTGAAGAAGCCTGGGTCCTCAGTGAAGGTTTCCTGCAAGGCTTCTGGATTCACCTCCGGCAGCTATGCTATCAGCTGGGTGCGACAGGCCCCCGGACAAGGGCTTGAGTGGATGGGAGTGATCATGCCTCTTGTTGGTGTAACAAACTACGCAGAGAAGTTCCAGGGCAGAGTCACGATTACCGCGGACACGTCCACAAGCACAGCCTACATGGAGCTGAGCGGCCTGAGATCTGAGGACACGGCCGTGTATTACTGTGCGAGAGG	QVQLVQSGAEVKKPGSSVKVSCKASGFTSGSYAISWVRQAPGQGLEWMGVIMPLVGVTNYAEKFQGRVTITADTSTSTAYMELSGLRSEDTAVYYCAR
IGHV1-138*02_S0520	CAGGTCCAGCTGGTGCAGTCCGGGGCTGAGGTGAAGAAGCCTGGGGCCTCAGTGAAGGTTTCCTGCAAGGCTTCTGGATTCACCTTTGGCAGCTATGCTATCAGCTGGGTGCGACAGGCCCCTGGACAAGGGCTTGAGTGGATGGGAGTGATCATCCCTCTTGTTGGTGTAACAAACTACGCAGAGAAGTTCCAGGGCAGAGTCACGATTACCGCGGACACGTCCACAAGCACAGCCTACATGGAGCTGAGCAGCCTGAGATCTGAGGACACGGCCATGTATTACTGTGCGAGAGG	QVQLVQSGAEVKKPGASVKVSCKASGFTFGSYAISWVRQAPGQGLEWMGVIIPLVGVTNYAEKFQGRVTITADTSTSTAYMELSSLRSEDTAMYYCAR
IGHV1-84*01	GAGGTCCAGCTGGTGCAGTCTGGGGCTGAGGTGAAGAAGCCTGGGGCCTCCGTGAAAATCTCCTGCAAGGCTTCTGGATACACCTTCACCGACTACTACCTGCACTGGGTGCGACAGGCTCCTGGAAAAGGGCTTGAGTGGATGGGACGTGTTGATCCTGAAGATGGTGAAGCAATACACGCACAGAAGTTCCAGGACAGAGTCACCATCACCGCGGACACGTCTACAGACACAGCCTACATGGAGCTGAGCAGCCTGAGATCTGAGGACACGGCCGTGTATTACTGTGCAACAGA	EVQLVQSGAEVKKPGASVKISCKASGYTFTDYYLHWVRQAPGKGLEWMGRVDPEDGEAIHAQKFQDRVTITADTSTDTAYMELSSLRSEDTAVYYCAT
IGHV1-NL_1*01_S2052	CAGGTCCAGCTGGTGCAATCCGGGGCTGAGGTGAAGAAGCCTGGGGCCTCAGTGAAGCTCTCCTGCAAGGCTTCCGGTTATACTTTTACCAGCTACAGTATAAACTGGGTGAGACAGGCCCCTGGACAAGGACTTGAGTGGATGGGATGGATTAACCCTAGCAATGGTAATACAGGCTACGCACAGAAGTTCCAGGGCAGAGTCACCATGACCAGGGACACGTCCACGAGTACAGCCTACATGGAGCTGAGCAGCCTGAGATCTGAGGACACGGCCGTGTATTACTGTGCAAGAGG	QVQLVQSGAEVKKPGASVKLSCKASGYTFTSYSINWVRQAPGQGLEWMGWINPSNGNTGYAQKFQGRVTMTRDTSTSTAYMELSSLRSEDTAVYYCAR
IGHV1-NL_1*01_S8759	CAGGTCCAGCTGGTGCAGTCCGGGGCTGAGGTGAAGAAGCCTGGGGCCTCAGTGAAGCTCTCCTGCAAGGCTTCCGGTTATACTTTTACCAGCTACAATATAAACTGGGTGAGACAGGCCCCTGGACAAGGACTTGAGTGGATGGGATGGATTAACCCTAGCAATGGTAATACAGGCTACGCACAGAAGTTCCAGGGCAGAGTCACCATGACCAGGGACACGTCCACAAGTACAGCCTACATGGAGCTGAACAGCCTGAGATCTGAGGACACGGCCGTGTATTACTGTGCAAGAGG	QVQLVQSGAEVKKPGASVKLSCKASGYTFTSYNINWVRQAPGQGLEWMGWINPSNGNTGYAQKFQGRVTMTRDTSTSTAYMELNSLRSEDTAVYYCAR
IGHV1-NL_2*01_S2809	CAGGTGCAGCTGGTGCAGTCTGGGGCTGAGGTGAAGAAGCCTGGATCCTCAGTGAAGGTCTCCTGCAAGGCTTCCGGATACACCTTCACTGACTACTACATGCAGTGGGTGCGACAGGCCCCTGGACAAGGGCTTGAGTGGATGGGAGAAATCAACCCAAAAACTGGTGGCACAAACTATGCACAGAAGTTCCAGGGCAGAGTCACCATGACCAGAGACACATCGACGAGCACAGCCTACATGGAGCTGAGCAGCCTGAGATCTGAGGACACGGCCGTGTATTACTGTGCAACAGA	QVQLVQSGAEVKKPGSSVKVSCKASGYTFTDYYMQWVRQAPGQGLEWMGEINPKTGGTNYAQKFQGRVTMTRDTSTSTAYMELSSLRSEDTAVYYCAT
IGHV2-118*01_S2768	CAGGTGACCTTGAAGGAGTCTGGTCCTGCGCTGGTGAAACCCACACAGACCCTCACGCTGACCTGCACCTTCTCTGGGTTCTCACTCAGTACTAGTGGTATGGGTGTGGGCTGGATCCGTCAGCCCTCACGGAAGACCCTGGAGTGGCTTGCACACATTTATTGGGATGATGATAAGCGCTACAGCACATCTCTGAAGAGCAGGCTCACCATCTCCAAGGACACCTCCAAAAACCAGGTGGTTCTAACAATGACCAACATGGACCCTGTGGACACAGCCACATATTACTGTGCACGGGGAC	QVTLKESGPALVKPTQTLTLTCTFSGFSLSTSGMGVGWIRQPSRKTLEWLAHIYWDDDKRYSTSLKSRLTISKDTSKNQVVLTMTNMDPVDTATYYCARG
IGHV2-118*01_S4531	CAGGTGACCTTGAAGGAGTCTGGTCCTGCGCTGGTGAAACCCACACAGACCCTCACGCTGACCTGCACCTTCTCTGGGTTCTCACTCAGTACTAGTGGTATGGGTGTGGGCTGGATCCGTCAGCCCTCACGGAAGACCCTGGAGTGGCTTGCACACATTTATTGGGATGATGATAAGCGCTACAGCACATCTCTGAAGAGCAGGCTCACCATCTCCAAGGACACCTCCAAAAACCAGGTGGTTCTAACAATGACCAACATGGACCCTGTGGACACAGCCACATATTACTGTGCACGGAGAC	QVTLKESGPALVKPTQTLTLTCTFSGFSLSTSGMGVGWIRQPSRKTLEWLAHIYWDDDKRYSTSLKSRLTISKDTSKNQVVLTMTNMDPVDTATYYCARR
IGHV2-69*02	CAGGTCACCTTGAAGGAGTCTGGTCCTGCGCTCGTGAAACCCACACAGACCCTCACGCTGACCTGCACCTTCTCTGGGTTCTCAATCAGCACTACTGGAACAGGTGTGGGCTGGATCCGTCAGCCCCCAGGGAAGGCCCTGGAATGGCTTGCAAGCATTTATTGGAATGATAGTAAATACTACAGCACATCGCTGAAGAGCAGGCTCACCATCTCCAAGGACACCTCCAAAAACCAGGTGGTTCTGACAATGACCAACATGGACCCTGTGGACACAGCCACATATTACTGTGCACGGGTAC	QVTLKESGPALVKPTQTLTLTCTFSGFSISTTGTGVGWIRQPPGKALEWLASIYWNDSKYYSTSLKSRLTISKDTSKNQVVLTMTNMDPVDTATYYCARV
IGHV2-7*02_S1732	CAGGTGACCTTGAAGGAGTCTGGTCCTGCGCTAGTGAAACCCACACAGACCCTCACGCTGACCTGCACCTTCTCTGGGTTCTCACTCAGCACTTCTGGAATGCGTGTGAGCTGGATCCGTCAGCCCCCAGGAAAGGCCCTGGAGTGGCTTGCACGCATTGATTGGGATGATGATAAATACTACAGCACATCTCTGAAGAGCAGGCTCACCATCTCCAAGGACACCTCCAAGAACCAGGTTGTCCTTACAATGACCAACATGGACCCTGTGGACACAGCCACATATTACTGTGCACGGAGAC	QVTLKESGPALVKPTQTLTLTCTFSGFSLSTSGMRVSWIRQPPGKALEWLARIDWDDDKYYSTSLKSRLTISKDTSKNQVVLTMTNMDPVDTATYYCARR
IGHV2-7*02_S4078	CAGGTGACCTTGAAGGAGTCTGGTCCTGCGCTAGTGAAACCCACACAGACCCTCACGCTGACCTGCACCTTCTCTGGGTTCTCACTCAGCACTTCTGGAATGCGTGTGAGCTGGATCCGTCAGCCCCCAGGAAAGGCCCTGGAGTGGCTTGCACGCATTGATTGGGATGATGATAAATACTATAGCACATCTCTGAAGAGCAGACTCACCATCTCCAAGGACACCTCCAAGAACCAGGTTGTCCTTACAATGACCAACATGGACCCTGTGGACACAGCCACATATTACTGTGCACGGGGAC	QVTLKESGPALVKPTQTLTLTCTFSGFSLSTSGMRVSWIRQPPGKALEWLARIDWDDDKYYSTSLKSRLTISKDTSKNQVVLTMTNMDPVDTATYYCARG
IGHV2-NL_1*01_S5779	CAGGTCACCTTGAAGGAGTCTGGTCCTGCGCTGGTGAAACCCACACAGACCCTCACGCTGACCTGCACCTTCTCTGGGTTCTCACTCACCACTAGTGGTATGGGTGTGGGCTGGATCCGTCAGCCCCCAGGGAAGGCCCTGGAGTGGCTGGCACTCATTTATTGGGATGATGATAAGCGCTACAGCACATCTCTGAAGAGCAGGCTCACCATCTCCAAGGACACCTCCAAGAACCAGGTTGTCCTTACAATGACCAACATGGACCCTGTGGACACAGCCACATATTACTGTGCACGGGGAC	QVTLKESGPALVKPTQTLTLTCTFSGFSLTTSGMGVGWIRQPPGKALEWLALIYWDDDKRYSTSLKSRLTISKDTSKNQVVLTMTNMDPVDTATYYCARG
IGHV2-NL_2*01_S2193	CAGGTGACCTTGAAGGAGTCTGGTCCTGCGTTGGTGAAACCCACACAGACCCTCACGCTGACCTGCACCTTCTCTGGGTTCTCACTCAGCACTTCTGGAACGGGTGTGAGCTGGATCCGTCAGCCCCCAGGGAAGGCCCTGGAGTGGCTGGCACGCATTGATTGGGATAATGATAAATACTACAGCACATCTCTGAAGAGCAGGCTCACCATCTCCAAAGACACCTCCAAAAACCAGGTGGTTCTAACAATAACCAACATGGACCCTGTGGACACAGCCACATATTACTGTGCACGG	QVTLKESGPALVKPTQTLTLTCTFSGFSLSTSGTGVSWIRQPPGKALEWLARIDWDNDKYYSTSLKSRLTISKDTSKNQVVLTITNMDPVDTATYYCAR
IGHV3-100*01_S4375	CAGTGTGTGGAGCAGCTGGTGGAGTCTGGGGGAGGCTTGGTACAGCCTGGGGCGTCCCTGAGACTCTCCTGTGCAGCCTCTGAATTCACCTTCAGTAGCTATGACATGCACTGGGTTCGCCAGGCTCCAGGGAAGGGTCTGGAGTGGGTATCAGCTATTAGCATTGGCGGTGGCACATACTACCCAGACTCTGTGAAGGGTCGATTCACCATCTCCAGAGACAATGCCAAGAACTCCTTGTATCTTCAAATGAACAGCCTGAGAGCTGAGGACACTGCTGTGTATTATTGTGCAAGAGA	QCVEQLVESGGGLVQPGASLRLSCAASEFTFSSYDMHWVRQAPGKGLEWVSAISIGGGTYYPDSVKGRFTISRDNAKNSLYLQMNSLRAEDTAVYYCAR
IGHV3-119*01_S8059	GAGGTGCAGCTGGCGGAGTCTGGGGGAGGCTTGGTCCAGCCTGGAGGGTCCCTGAGACTCTCCTGTGCAGCCTCTGGATTCACCGTTAGCAGCTACTGGATGAGCTGGGTCCGCCAGGCTCCGGGAAAGGGGCTGGAGTGGCTTTCAGACATTTATGGTAGTACCATGTACTACGGAGACTCTGTGAAGGGCCGATTCACCGTCTCCAGAGACAATGCCAAGAACTCGCTGTATCTGCAAATGAACAGCCTGAAAACCGAGGACACGGCCGTGTATTACTGTACTAGAGA	EVQLAESGGGLVQPGGSLRLSCAASGFTVSSYWMSWVRQAPGKGLEWLSDIYGSTMYYGDSVKGRFTVSRDNAKNSLYLQMNSLKTEDTAVYYCTR
IGHV3-122*01_S8388	GAGGTGCAGCTGGTGGAGTCTGGGGGCGGCTTGGCAAAGCCTGGGGGGTCCCTGAGACTCTCCTGCGCAGCCTCCGGATTCACCTTCAGTGACTACTACATGGACTGGGTCCGCCAGGCTCCAGGGAAGGGGCTGGAGTGGGTCTCACGTATTAGTAATGGTGGTGGTAGCACATGGTACGCAGACTCCGTGAAGGGCAGATTCACCATCTCCAGAGAGAACGCCAAGAACACACTGTATCTTCAAATGAACAGCCTGAGAGCTGAGGACACGGCTGTCTATTACTGTGCGAGAGA	EVQLVESGGGLAKPGGSLRLSCAASGFTFSDYYMDWVRQAPGKGLEWVSRISNGGGSTWYADSVKGRFTISRENAKNTLYLQMNSLRAEDTAVYYCAR
IGHV3-127*01_S5171	GAGGTGCAGCTGGTGGAGTCTGGGGGAGGCTTGGTCCAGCCTGGGGGGTCCCTGAGACTCTCCTGTGCAGCCTCTGGATTCACCTTTGGTGATTATGGCATGCACTGGGTCCGCCAGGCTCCGGGAAAGGGACTGGAGTGGGTCTCATCCATTAGTTACACTGGTAAAACCGTATACTACGCTGACTCCGTGAAGGGCCGATTCACCGTCTCCAGAGACAACGCCAAGAACTCGCTGTCTCTGCAAATGAGCAGCCTGAGAGCCGAGGACACGGCCGTGTATTACTGTACTAGAGA	EVQLVESGGGLVQPGGSLRLSCAASGFTFGDYGMHWVRQAPGKGLEWVSSISYTGKTVYYADSVKGRFTVSRDNAKNSLSLQMSSLRAEDTAVYYCTR
IGHV3-128*02_S0204	GAGGTGCAGCTGGTGGAGTCTGGGGGAGGCTTGGTCCAGCCTGGGGGGTCCCTGAGACTCTCCTGTGCAGCCTCTGGATTCACCTTCAGTAACCACTACATGTACTGGGTCCGCCAGGCTCCAGGAAAGGGGCTGGAGTGGGTGGGTTTCATTAGAAGCAAAGCTTACGGTGGGACAGCAGAATACGCCGCGTCTGTGAAAGGCAGATTCACCATCTCCAGAGATGATTCCAAAAGCATCGCCTATCTGCAAATGAACAGCCTGAAAACCGAGGACACGGCCGTGTATTACTGTACTAGGGA	EVQLVESGGGLVQPGGSLRLSCAASGFTFSNHYMYWVRQAPGKGLEWVGFIRSKAYGGTAEYAASVKGRFTISRDDSKSIAYLQMNSLKTEDTAVYYCTR
IGHV3-141*01_S4757	GAAGTGCAGCTGGTGGAGTCTGGGGGAGGCCTGGTACAGCCTGGGGGGTCCCTGAGACTCTCGTGTGCAGCCTCTGGATTCACCTTTGATGATTATGCCATGGGCTGGGTCCGCCAAGCTCCAGGGAAGGGTCTGGAGTGGGTCTCTGGTATTAGCTGGAGTGGGGGTAGCACAGGCTATGCAGACTCCGTCAAGGGCCGATTCACCATCTCCAGAGACAACGCCAAGAACTCCCTGTATCTGCAAATGGACAGGCTGAGAGCTGAGGACACCGCCTTGTATTACTGTGCGAGAGA	EVQLVESGGGLVQPGGSLRLSCAASGFTFDDYAMGWVRQAPGKGLEWVSGISWSGGSTGYADSVKGRFTISRDNAKNSLYLQMDRLRAEDTALYYCAR
IGHV3-141*02_S1149	GAAGTGCAGCTGGTGGAGTCTGGGGGAGGCGTGGTACAGCCTGGGGGGTCCCTGAGACTCTTGTGTGCAGCCTCTGGATTCACCTTTGATGATTATGCCATGCACTGGGTCCGCCAAGCTCCAGGGAAGGGTCTGGAGTGGGTCTCTGATATTAGCTGGAGTGGTGGTAGCACATACTATGCAGACTCCGTGAAGGGCCGATTCACCATCTCCAGAGACAACGCCAAGAACTCCCTGTATCTGCAAATGAACAGGCTGAGAGCTGAGGACACAGCCTTGTATTACTGTGCGAGAGA	EVQLVESGGGVVQPGGSLRLLCAASGFTFDDYAMHWVRQAPGKGLEWVSDISWSGGSTYYADSVKGRFTISRDNAKNSLYLQMNRLRAEDTALYYCAR
IGHV3-143*01_S8819	GAGGTGCAGCTGGTGGAGTCTGGGGGAGGCTTGGTACAGCCTGGCGGGTCCCTGAGACTGTCCTGTGCAGCCTCTGGATTCACCTTCAGTAGCTATGCTATGCAGTGGGTTCACCAGGCTCCAGGGAAGGGTCTGGAGTGGGTATCAGCTATTGGTCCTGGTGGTGACACATACTATGCAGACGCCGTGAAGGGCAGATTCACCATCTCCAGAGACAACGCCAAGAACTCCTTGTATCTTCAAATGAACAGCCTGAGAGCCGAGGACACGGCTGTGTATTACTGTGCAAGAGA	EVQLVESGGGLVQPGGSLRLSCAASGFTFSSYAMQWVHQAPGKGLEWVSAIGPGGDTYYADAVKGRFTISRDNAKNSLYLQMNSLRAEDTAVYYCAR
IGHV3-152*01	GAGGTGCAGCTGGTGGAGTCTGGGGGCGGCTTGGCACAGCCTGGGGGGTCCCTGAGACTCTCCTGTGCAGCCTCTGGATTCACCTTCAGTGACCACTACATGGACTGGGTCCGCCAGGCTCCAGGGAAGGGCCTGGAGTGGGTTAGCCGTATTAGAAACAAAGCTAACAGTTACACAACAGAATACGCCGCGTCTGTGAAAGGCAGATTCACCATCTCAAGGGATGATTCAAAGAACACACTGTATCTGCAAATGAGCAGCCTGAAAACCGAGGACACGGCTGTGTATTACTGTGCTAGAGA	EVQLVESGGGLAQPGGSLRLSCAASGFTFSDHYMDWVRQAPGKGLEWVSRIRNKANSYTTEYAASVKGRFTISRDDSKNTLYLQMSSLKTEDTAVYYCAR
IGHV3-177*01_S1591	GAGGTGCAGCTGGTGGAGTCTGGGGGCGGCTTGGCAAAGCCTGGGGGGTCCCTGAGACTCTCCTGTGCAGCCTCTGGATTCACCTTCAGTAACTACTGGATGTACTGGGTTCGCCAGGCACCAGGGAAGGGGCTGGAGTGGATCTCAGCTATTAATAGTGCTGGTAGTAGCACATACTATGCAGACTCCGTGAAGGGCAGATTCACCATCTCCAGAGAGAACGCCAAGAACACACTGTATCTTCAAATGGACAGCCTGAGAGCTGAGGACACGGCTGTCTATTACTGTGCGGGAGA	EVQLVESGGGLAKPGGSLRLSCAASGFTFSNYWMYWVRQAPGKGLEWISAINSAGSSTYYADSVKGRFTISRENAKNTLYLQMDSLRAEDTAVYYCAG
IGHV3-187*01_S8972	GAGGTGCAGCTGGTGGAGTCTGGGGGAGGCTTGGTCCAGCCTGGGGGTTCCCTGAGACTCTCCTGTGCAGCCTCCGGATTCACCTTCAGTAACTACTGGATGAGCTGGGTCCGCCAGGCTCCAGGGAAGGGGCTGGAGTGGGTTGGATTTATTAAAAACAAAGCCGATGGTGGAACAGCAGCATACGCCGAATCTGTGAAAGGCAGATTCACTATCTCAAGAGATGATTCAAAGAACACACTGTACCTGCAAATGAACAGCCTGAAAACCGAGGACACGGCCGTGTATTACTGTGCTAGAGA	EVQLVESGGGLVQPGGSLRLSCAASGFTFSNYWMSWVRQAPGKGLEWVGFIKNKADGGTAAYAESVKGRFTISRDDSKNTLYLQMNSLKTEDTAVYYCAR
IGHV3-187*02	GAGGTGCAGCTGGTGGAGTCTGGGGGAGGCTTGGTCCAGCCTGGGGGATCCCTGAGACTCTCCTGTGCAGCCTCTGGATTCACCTTCAGTAACTACTGGATGAACTGGGTCCGCCAGGCTCCAGGGAAGGGGCTGGAGTGGGTTGGATTTATTAAAAACAAAGCCGATGGTGGAACAGCAGCATACGCCGAATCTGTGAAAGGCAGATTCACTATCTCAAGAGATGATTCAAAGAACACACTGTACCTGCAAATGAACAGCCTGAAAACCGAGGACACGGCCGTGTATTACTGTACTAGAGA	EVQLVESGGGLVQPGGSLRLSCAASGFTFSNYWMNWVRQAPGKGLEWVGFIKNKADGGTAAYAESVKGRFTISRDDSKNTLYLQMNSLKTEDTAVYYCTR
IGHV3-50*01	GAGGTGCAGCTGGTGGAGTCTGGAGGAGGCTTGGTTCAGCCTGGGGGGTCCCTGAGACTCTCCTGTGCAGCCTCTGGATTCACCTTCAGTAGCTATGGCATGCACTGGGTCCGCCAGGCTCCAGGGAAGGGGCTGGAGTGGGTGGCAGTTATATCGTATGATGGAAGTAAGAAATACTACGCAGACTCTGTGAAGGACCGATTCACCATCTCCAGAGACAATTCCAAGAACATGCTATATCTTCAAATGAACAACCTGAAATTGGAGGACACGGCCGTGTATTACTGTGCGAGAGA	EVQLVESGGGLVQPGGSLRLSCAASGFTFSSYGMHWVRQAPGKGLEWVAVISYDGSKKYYADSVKDRFTISRDNSKNMLYLQMNNLKLEDTAVYYCAR
IGHV3-50*01_S1879	GAGGTGCAGCTGGTGGAGTCTGGAGGAGGCTTGGTTCAGCCTGGGGGGTCCCTGAGACTCTCCTGTGCAGCCTCTGGATTCACCTTCAGTAGCTATGGCATGCACTGGGTCCGCCAGGCTCCAGGGAAGGGGCTGGAGTGGGTGGCAGTTATATGGTATGATGGAAGTAAGAAATACTACGCAGACTCTGTGAAGGACCGATTCACCATCTCCAGAGACAATTCCAAGAACATGCTATATCTTCAAATGAACAACCTGAAATTGGAGGACACGGCCGTGTATTACTGTGCGAGAGA	EVQLVESGGGLVQPGGSLRLSCAASGFTFSSYGMHWVRQAPGKGLEWVAVIWYDGSKKYYADSVKDRFTISRDNSKNMLYLQMNNLKLEDTAVYYCAR
IGHV3-52*02_S2646	GAGGCGCAGCTGATGGAAACTGGCGGAGGCTTGGTACAGCCTGGGGGGTCCCTGAGACTCTCCTGTGCAGCCTCTGGATTCACCTTCAGTGACCACTACATGCAGTGGGTCCGCCAGGCTCCAGGGAAGGGGTTGGAGTGGGTAGGATTAATTAGAAACAAAGCTGATGGTGAGACAACAGACTACGCTGCCTCTGTGAAAGGCAGATTCACCATCTCCAGAGATGATTCGAAAAGCATCACCTATCTGCAAATGAACAACCTGAAAACCGAGGACACGGCCGTGTATTACTGTGCGAGGAA	EAQLMETGGGLVQPGGSLRLSCAASGFTFSDHYMQWVRQAPGKGLEWVGLIRNKADGETTDYAASVKGRFTISRDDSKSITYLQMNNLKTEDTAVYYCAR
IGHV3-53*01_S4423	GAGGTGCAGCTGGTGGAGTCTGGGGGCGGCTTGGCAAAGCCTGGGGGGTCCCTGAGACTCTCCTGTGCAGCCTCCGGATTCACCTTCAGTGACCACTACATGCACTGGGTCCGCCAGGCTTCAGGGAAGGGGCTGGAGTGGGTCTCAGGTATTAGTTATACTGGTGGTAGCACATGGTACGCAGACTCCGTGAAGGGCAGATTCACCATCTCCAGAGAGAACGCCAAGAACACACTGTATCTTCAAATGGACAGCCTGAGAGCTGAGGACACGGCTGTCTATTACTGTGCGGGAGA	EVQLVESGGGLAKPGGSLRLSCAASGFTFSDHYMHWVRQASGKGLEWVSGISYTGGSTWYADSVKGRFTISRENAKNTLYLQMDSLRAEDTAVYYCAG
IGHV3-73*02	GAGGTGCAGCTGGTGGAGTCTGGGGGAGGCTTGGTAAAGCCTGGGGGGTCCCTGAGACTCTCTTGTGTAGCCTCTGGGTTCACCTTCAGTAGCTATGTTATGCACTGGGTCCGCCAGGCTCCAGGAAAGGGTCTGGAGTGGGTCTCAGTTATTAGTGAAAGTGGTGGTACCACATACTACGCAGACTCTGTGAAGGGCCGATTCACCATCTCCAGAGACAACGCCAAGAACTCACTGTTTCTGCAAATGAACAGCCTGAGAGCCGAGGACACGGCCGTGTATTACTGTACTAGAGA	EVQLVESGGGLVKPGGSLRLSCVASGFTFSSYVMHWVRQAPGKGLEWVSVISESGGTTYYADSVKGRFTISRDNAKNSLFLQMNSLRAEDTAVYYCTR
IGHV3-76*02_S4190	GAGGTGCAGCTGGTGGAGTCTGGGGGCGGCTTGGCAAAGCCTGGGGGATCCCTGAGACTCTCCTGTGCAGCCTCTGGATTCACCTTCAGTAGCTATGCTATGCACTGGGTCCGCCAGGCTCCAGGGAAGGGGCTGGAGTGGGTCTCAGCTATTAGTAGTGGTGGTAGCACATACTACGCAGACTCCGTGAAGGGCCGATTCACCATCTCCAGAGACAACTCAAAGAACACGCTCTCCCTGCAAATGAACAGCCTGAGAGCTGAGGACACGGCCGTGTATTACTGTGCGAAAGA	EVQLVESGGGLAKPGGSLRLSCAASGFTFSSYAMHWVRQAPGKGLEWVSAISSGGSTYYADSVKGRFTISRDNSKNTLSLQMNSLRAEDTAVYYCAK
IGHV3-83*01	GAAGTGCAGTTGGTGGAGTCTGGGGGAGGCTTGGTACAGCCTGGGGGGTCCCTGAGACTCTCCTGTGCAGCCTCTGGATTCACCTTCAGTGACCACTACATGGACTGGGTCCGCCAGGCTCCAGGGAAGGGGCTGGAGTGGGTCTCAAGTATTAGCAGTGGTAGTGGTAGTACCACATTGTACCCAGACTCTGTCAAGGGCCGATTCACCATCTCCAGAGACAATGCCAAGAACACAGTGTATCTGCAAATGAACAGCCTGAGAGCCGAGGACACGGCTGTCTATTACTGTGCGAGACA	EVQLVESGGGLVQPGGSLRLSCAASGFTFSDHYMDWVRQAPGKGLEWVSSISSGSGSTTLYPDSVKGRFTISRDNAKNTVYLQMNSLRAEDTAVYYCAR
IGHV3-87*01_S6693	GAGGTGCAGCTGGCGGAGTCTGGGGGAGGCTTGGTACAGCCTGGGGGGTCCCTGAGACTCTCCTGTGCAGCCTCCGGATTCACCTTCAGTAGCTACGAAATGCACTGGGTCCGCCAGGCTCCAGGGAAGTGGCTGGAGTCCGTCTCAGTTATTGGTGGTGATAGTAGTTACACACACTACGCAGACTCTGTGAAGGGCCGATTCACCATCTCCAGAGACAACGCCAAGAACTCGCTGTCTCTGCAAATGAACAGCCTGAGAGCCGACGACACGGCCGTGTATTACTGTGCGAGACA	EVQLAESGGGLVQPGGSLRLSCAASGFTFSSYEMHWVRQAPGKWLESVSVIGGDSSYTHYADSVKGRFTISRDNAKNSLSLQMNSLRADDTAVYYCAR
IGHV3-88*02_S2572	GAGGTGCAGCTGGTGGAGTCTGGGGGAGCCTTGGTCCAGCCTGGCGGGTCCCTGAGAGTCTCCTGTGCAGCCTCTGGATTCACCTTCAGTGACCACTACATGCAGTGGGTCCGCCAGGCTCCAGGAAAGGGGCCGGAGTGGGTAGGTTTCATTAGAAACAAAGCTAATGGTGGGACAGCAGAATACGCCGCGTCTGTGAAAGGCAGATTCACCATCTCAAGAGATGATTCCAAAAGCATTGCCAGTCTGCAAATGAACAGCCTGAAAACCGAGGACACGGCCGTGTATTACTGTGCTAGAGA	EVQLVESGGALVQPGGSLRVSCAASGFTFSDHYMQWVRQAPGKGPEWVGFIRNKANGGTAEYAASVKGRFTISRDDSKSIASLQMNSLKTEDTAVYYCAR
IGHV3-9*01	GAGGTGCAGCTGGTGGAGTCTGGGGGAGGCTTGGTGCAGCCTGGGGGGTCCCTGAGACTCTCCTGTGCAGCCTCTGGATTCACCTTCAGTAACTACTACATGCACTGGGTCCGCCAGGCTCAAGGGAAAGGGCTAGAGTGGGTAGGTTTAATAAGAAACAAAGCTAACAGTTACACGACAGAATATGCTGCGGCTGTGAAAGGCAGATTCACCATCTCAAGAGATGATTCAAAGAACACGCTGTATCTGCAAATGAGCAGCCTGAAAACCGAGGACACAGCCCTGTATTACTGTACTAAA	EVQLVESGGGLVQPGGSLRLSCAASGFTFSNYYMHWVRQAQGKGLEWVGLIRNKANSYTTEYAAAVKGRFTISRDDSKNTLYLQMSSLKTEDTALYYCTK
IGHV3-9*02	GAGGTGCAGCTGGTGGAGTCTGGGGGAGGCTTGGTGCAGCCTGGGGGGTCCCTGAGACTCTCCTGTGCAGCCTCTGGATTCACCTTCAGTAACTACTACATGCACTGGGTCCGCCAGGCTCAAGGGAAAGGGCTAGAGTGGGTAGGTTTAATAAGAAACAAAGCTAACAGTTACACGACAGAATATGCTGCGGCTGTGAAAGGCAGATTCACCATCTCAAGAGATGATTCAAAGAACACGCTGTATCTGCAAATGAGCAGCCTGAAAACCGAGGACACAGCCGTGTATTACTGTACTAAA	EVQLVESGGGLVQPGGSLRLSCAASGFTFSNYYMHWVRQAQGKGLEWVGLIRNKANSYTTEYAAAVKGRFTISRDDSKNTLYLQMSSLKTEDTAVYYCTK
IGHV3-94*01	GAGGTGCAGCTGGTGGAGTCTGGGGGCGGCTTGGCAAAGCCTGGGGGGTCCCTGAGACTCTCCTGTGCAGCCTCTGGATTCAGCTTCAGTGACTACTACATGTACTGGGTCCGCCAGGCTCCAGGGAAGGGGCTGGAGTGGGTCTCAGGTATTAGTTATACTGGTGGTAGCACATACTATGCAGACTCCGTGAAGGGCAGATTCACCATCTCCAGAGAGAACGCCAAGAACACACTGTATCTTCAAATGGACAGCCTGAGAGCTGAGGACACGGCTGTCTATTACTGTGCGAGAGA	EVQLVESGGGLAKPGGSLRLSCAASGFSFSDYYMYWVRQAPGKGLEWVSGISYTGGSTYYADSVKGRFTISRENAKNTLYLQMDSLRAEDTAVYYCAR
IGHV3-94*01_S8869	GAGGTGCAGCTGGTGGAGTCTGGGGGCGGCTTGGCAAAGCCTGGGGGGTCCCTGAGACTCTCCTGTGCAGCCTCTGGATTCAGCTTCAGTGACTACAACATGCACTGGGTCCGCCAGGCTCCAGGGAAGGGGCTGGAGTGGGTCTCAGGTATTAGTTATACTGGTGGTAGCACATACTATGCAGACTCCGTGAAGGGCAGATTCACCATCTCCAGAGAGAACGCCAAGAACACACTGTATCTTCAAATGGACAGCCTGAGAGCTGAGGACACGGCTGTCTATTACTGTGCGAGAGA	EVQLVESGGGLAKPGGSLRLSCAASGFSFSDYNMHWVRQAPGKGLEWVSGISYTGGSTYYADSVKGRFTISRENAKNTLYLQMDSLRAEDTAVYYCAR
IGHV3-NL_1*01_S4331	GAGGTGCAGCTGGTGGAGTCTGGGGGAGGCTTGGTCCAGCCTGGAGGGTCCCTGAGACTCTCCTGTGCAGCCTCTGGATTCACCTTCAGTAGTTACGACATGAGCTGGGTCCGCCAGGCTCCGGGAAAGGGGCTGGAGTGGGTCTCATATATTAGTTACACTGGTAAAACCATATACTACGCTGACTCCGTGAAGGGCCGATTCACCATCTCCAGAGACAACGCCAAGAACTCGCTGTCTCTGCAAATGAGCAGCCTGAGAGCCGAGGACACGGCCGTGTATTACTGTACTAGAGA	EVQLVESGGGLVQPGGSLRLSCAASGFTFSSYDMSWVRQAPGKGLEWVSYISYTGKTIYYADSVKGRFTISRDNAKNSLSLQMSSLRAEDTAVYYCTR
IGHV3-NL_1*01_S9422	GAGGTGCAGCTGGTGGAGTCTGGGGGAGGCTTGGTCCAGCCTGGAGGGTCCCTGAGACTCTCCTGTGCAGCCTCTGGATTCACCTTCAGTAGTTACGACATGAGCTGGGTCCGCCAGGCTCCGGGAAAGGGGCTGGAGTGGGTCTCATATATTAGTTACACTGGTAAAACCATATACTACGCTGACTCCGTGAAGGGCCGATTCACCATCTCCAGAGACAACGCCAAGAACTCGCTGTCTCTGCAAATGAGCAGCCTGAGAGCCGAGGACACGGCCGTGTATTACTGTACTAGGGA	EVQLVESGGGLVQPGGSLRLSCAASGFTFSSYDMSWVRQAPGKGLEWVSYISYTGKTIYYADSVKGRFTISRDNAKNSLSLQMSSLRAEDTAVYYCTR
IGHV3-NL_11*01_S3736	GAGGTGCAGCTGGTGGAGACTGGAGGAGGCTTGGTCCAGCCTGGGGGGTCCCTGAAACTCTCCTGTGCAGCCTCTGGATTCACCTTCAGTAGCTATGGCATGAGCTGGGTCCGCCAGGCTCCAGGGAAGGGGCTAGAGTGGGTCTCAGCTATTAATAGTGGTGGGGGTAGCACATACTACGCAGACTCCGTGAAGGGCCGATTCACCATCTCCAGAGACAACTCAAAGAACACGCTCTCCCTGCAAATGAACAGCCTGAGAGCTGAGGACACGGCCGTGTATTACTGTGCGAAAGA	EVQLVETGGGLVQPGGSLKLSCAASGFTFSSYGMSWVRQAPGKGLEWVSAINSGGGSTYYADSVKGRFTISRDNSKNTLSLQMNSLRAEDTAVYYCAK
IGHV3-NL_12*02_S3827	GAGGTGCAGCTGGTGGAGTCTGGGGGAGGGTTGGTCCAGCCTGGCGGGTCCCTGAGAGTCTCCTGTGCAGCCTCTGGATTCACCTTCAGTGACCACTACATGTACTGGTTCCGCCAGGCTCCAGGGAAGGGGCCGGAGTGGGTAGGTTTCATTAGAAATAAAGCTAAAGGTGGGACAGCAGAATACGCCGCGTCTGTGAAAGGCAGATTCACTATCTCAAGAGATGATTCCAAAAACGTCACCTATCTGCAAATGAACAGCCTGAACACCGAGGACACGGCCGTGTATTACTGCACCACAGA	EVQLVESGGGLVQPGGSLRVSCAASGFTFSDHYMYWFRQAPGKGPEWVGFIRNKAKGGTAEYAASVKGRFTISRDDSKNVTYLQMNSLNTEDTAVYYCTT
IGHV3-NL_15*01_S4749	GACGTGCAGCTGGTGGAGTCTGGGGGAGGCGTGGTCCAGCCTGGCGGGTCCCTGAGACTCTCCTGTGCAGCCTCTGGATTCACGTTTGATGATTATGCCATGAGCTGGGTCCGCCAGGCTCCAGGGAAGGGTCTGGAGTGGGTATCTCGGATTAGTTGGGATGGTGGTAGCACATATTACGCAGACTCCGTGAAGGGCCGATTCACCATCTCCAGAGACAACGCCAAGAACTCCCTGTTTCTGCAAATGGACAGGCTGAGAGCTGAGGACACGGCCGTGTATTACTGTACTAGAGA	DVQLVESGGGVVQPGGSLRLSCAASGFTFDDYAMSWVRQAPGKGLEWVSRISWDGGSTYYADSVKGRFTISRDNAKNSLFLQMDRLRAEDTAVYYCTR
IGHV3-NL_17*01_S0507	GAGGTGCAGCTGGTGGAGTCTGGGGCAGGCTTGGTCCAGCCTGGCGGGTCCCTGAGACTCTCCTGTGCAGCCTCTGGATTCACCTTCAGTAACTCCTGGATGAGCTGGGTCCGCCAGGCTCCAGGCAAGGGGCTAGAGTGGGTTGCCCGTATTAAAAGGAAAGCTGACGGTGAGACAGCAGATTACGCCGCATCTGTGAAAGGCAGATTCACCATCTCAAGAGACGATTCAAAGAACACACTGTACCTGCAAATGAACAGCCTGAAAACCGAGGACACGGCCGTGTATTACTGCACCACAGA	EVQLVESGAGLVQPGGSLRLSCAASGFTFSNSWMSWVRQAPGKGLEWVARIKRKADGETADYAASVKGRFTISRDDSKNTLYLQMNSLKTEDTAVYYCTT
IGHV3-NL_17*01_S4736	GAGGTGCAGCTGGTGGAGTCTGGGGCAGGCTTGGTCCAGCCTGGCGGGTCCCTGAGACTCTCCTGTGCAGCCTCTGGATTCACCTTCAGTAACTCCTGGATGAGCTGGGTCCGCCAGGCTCCAGGGAAGGGGCTAGAGTGGGTTGCCCGTATTAAAAGGAAAGCTGACGGTGAGACAGCAGATTACGCCGCATCTGTGAAAGGCAGATTCACCATCTCAAGAGACGATTCAAAGAACACACTGTACCTGCAAATGAACAGCCTGAAAACCGAGGACACGGCCGTGTATTACTGCACCACAGA	EVQLVESGAGLVQPGGSLRLSCAASGFTFSNSWMSWVRQAPGKGLEWVARIKRKADGETADYAASVKGRFTISRDDSKNTLYLQMNSLKTEDTAVYYCTT
IGHV3-NL_18*01_S0984	GAGGTGCAGCTGGTGGAGTCTGGGGGAGGCTTGGTCCAGCCTGGCGGGTCCCTGAGACTCTCCTGTGCAGCCTCTGGATTCACCTTCAGTAGTTCTGCTATGCACTGGGTCCGCCAGGCTTCTGGGAAAGGACTGGAGTGGGTTGGACGTATTAGAAGCAAATCTAACAATTACGAGACAGGATACGCTGCGTCGGTGAAAGGCAGGTTCACCATCTCCAGAGATGATTCAAAGAACACGGCGTATCTGCAAATGAACAGCCTGAAAACCGAGGACACGGCCGTGTATTACTGTGCTAGAGA	EVQLVESGGGLVQPGGSLRLSCAASGFTFSSSAMHWVRQASGKGLEWVGRIRSKSNNYETGYAASVKGRFTISRDDSKNTAYLQMNSLKTEDTAVYYCAR
IGHV3-NL_2*01_S6117	GAGGTGCAGCTGGTGGAGTCTGGGGGAGGCCTGGTCCAGCCTGGGGGGTCCCTGAGACTCTCCTGTGCAGCCTCTGGATTCACCTTCAGTAGCTACTGGATGTACTGGGTCCGCCAGGCTCCAGGGAAGGGGCTGGAGTGGGTCTCACGTATTAGTAGTGATGGGAGTAGCACAAGCTACGCAGACTCCGTGAAGGGCCGATTCACCATCTCCAGAGAGAACGCCAAGAACTCACTGTATCTGCAAATGAACAGTTTGAGAGCTGAAGACACAGCTGTGTATTACTGTACTACAGA	EVQLVESGGGLVQPGGSLRLSCAASGFTFSSYWMYWVRQAPGKGLEWVSRISSDGSSTSYADSVKGRFTISRENAKNSLYLQMNSLRAEDTAVYYCTT
IGHV3-NL_8*01_S7742	GAGGTGCAGCTGGTGGAGTCTGGGGGAGGCTTGGTCCAGCCTGGCGGGTCCCTGAGACTCTCCTGTGCAGCCTCTGGATTCACCTTCGGTAGCTATGGCATGCACTGGGCCCGCCAGGCTCCAGGGAAGGGGCTGCAGTGGGTCTCAGCTATTAATACTGGTGGGGGTAGCACATGGTACACAGACTCTGTAAAGGGCAGATTCACCATCTCCAGAGAGAACGCCAAGAACACACTGTATCTTCAAATGGACAGCCTGAGAGCTGAGGACACGGCTGTCTATTACTGTGCGAGAGA	EVQLVESGGGLVQPGGSLRLSCAASGFTFGSYGMHWARQAPGKGLQWVSAINTGGGSTWYTDSVKGRFTISRENAKNTLYLQMDSLRAEDTAVYYCAR
IGHV4-117*01	CAGCTGCAGCTGCAGGAGTCGGGCCCAGGACTGGTGAAGCCTTCGGAGACCCTGTCCCTCACCTGCGCTGTCTCTGGTGGCTCCATCAGCAGTAACTACTGGAGCTGGATCCGCCAGCCCCCAGGGAAGGGACTGGAGTGGATTGGACGTATCTCTGGTAGTGGTGGGAGCACCGACTACAACCCCTCCCTCAAGAGTCGAGTCACCATTTCAACAGACACGTCCAAGAACCAGTTCTCCCTGAAGCTGAGCTCTGTGACCGCCGCGGACACGGCCGTGTATTACTGTGCGAGAGA	QLQLQESGPGLVKPSETLSLTCAVSGGSISSNYWSWIRQPPGKGLEWIGRISGSGGSTDYNPSLKSRVTISTDTSKNQFSLKLSSVTAADTAVYYCAR
IGHV4-117*01_S0312	CAGGTGCAGCTGCAGGAGTCGGGCCCAGGACTGGTGAAGCCTTCGGAGACCCTGTCCCTCACCTGCGCTGTCTCTGGTGGCTCCATCAGCAGTAACTACTGGAGCTGGATCCGCCAGCCCCCAGGGAAGGGACTGGAGTGGATTGGACGTATCTCTGGTAGTGGTGGGAGCACCGACTACAACCCCTCCCTCAAGAGTCGAGTCACCATTTCAACAGACACGTCCAAGAACCAGTTCTCCCTGAAGCTGAGCTCTGTGACCGCCGCGGACACGGCCGTGTATTACTGTGCGAGAGA	QVQLQESGPGLVKPSETLSLTCAVSGGSISSNYWSWIRQPPGKGLEWIGRISGSGGSTDYNPSLKSRVTISTDTSKNQFSLKLSSVTAADTAVYYCAR
IGHV4-117*01_S6342	CAGCTGCAGCTGCAGGAGTCGGGCCCAGGACTGGTGAAGCCTTCAGAGACCCTGTCCCTCACCTGCGCTGTCTCTGGTGGCTCCATCAGTAGTAACTGGTGGAGCTGGATCCGCCAGCCCCCAGGGAAGGGACTGGAGTGGATTGGACGTATCTCTGGTAGTGGTGGGAGCACCAGCTACAACCCCTCCCTCAAGAGTCGAGTCACCATTTCAACAGACACGTCCAAGAACCAGTTCTCCCTGAAGCTGAGCTCTGTGACCGCCGCGGACACGGCCGTGTATTACTGTGCGAGAGA	QLQLQESGPGLVKPSETLSLTCAVSGGSISSNWWSWIRQPPGKGLEWIGRISGSGGSTSYNPSLKSRVTISTDTSKNQFSLKLSSVTAADTAVYYCAR
IGHV4-144*01_S3676	CAGGTGAAGCTGCAGCAGTGGGGCGAAGGACTGGTGAAGCCTTCGGAGACCCTGTCCCTCACCTGCGCTGTCTATGGTGGCTCCATCAGCGGTTACTACTACTGGAGCTGGATCCGCCAGCCCCCAGGGAAGGGGCTGGAGTGGATTGGGTATATCTATGGTAATAGTGCGAGCACCAACTACAACCCCTCCCTCAAGAATCGAGTCACCATTTCAAAAGACACGTCCAAGAACCAGTTCTCCCTGAAGCTGAGCTCTGTGACCGCCGCGGACACGGCCGTGTATTACTGTGCGAGAGA	QVKLQQWGEGLVKPSETLSLTCAVYGGSISGYYYWSWIRQPPGKGLEWIGYIYGNSASTNYNPSLKNRVTISKDTSKNQFSLKLSSVTAADTAVYYCAR
IGHV4-144*01_S5374	CAGGTGAAGCTGCAGCAGTGGGGCGAAGGACTGGTGAAGCCTTCGGAGACCCTGTCCCTCACCTGCGCTGTCTATGGTGGCTCCATCAGCGATTACTACTACTGGAGCTGGATCCGCCAGCCCCCAGGGAAGGGACTGGAGTGGATTGGGTATATCTATGGTAATAGTGCGAGCACCAACTACAACCCCTCCCTCAAGAATCGAGTCACCATTTCAAAAGACACGTCCAAGAACCAGTTCTCCCTGAAGCTGAGCTCTGTGACCGCCGCGGACACGGCCGTGTATTACTGTGCGAGAGA	QVKLQQWGEGLVKPSETLSLTCAVYGGSISDYYYWSWIRQPPGKGLEWIGYIYGNSASTNYNPSLKNRVTISKDTSKNQFSLKLSSVTAADTAVYYCAR
IGHV4-149*01_S7944	CAGGTGCAGCTGCAGGAGTCGGGCCCAGGACTGGTGAAGCCTTCAGAGACCCTGTCCCTCACCTGCGCTGTCTCTGGTGCCTCCATCAGTAGTTACTGGTGGAACTGGATCCGCCAGCCCCCAGGGAAGGGACTGGAGTGGATTGGGGAGATCAATGGTAATAGTGGGAGCACCAACTACAACCCCTCCCTCAAGAGTCGAGTCACCATTTCAAAAGACGCGTCCAAGAACCAGTTCTCCCTGAAGCTGAGCTCTGTGACCGCCGCGGACACGGCCGTGTATTACTGTGCGAGAGA	QVQLQESGPGLVKPSETLSLTCAVSGASISSYWWNWIRQPPGKGLEWIGEINGNSGSTNYNPSLKSRVTISKDASKNQFSLKLSSVTAADTAVYYCAR
IGHV4-150*01_S5381	CAGGTGCAGCTGCAGGAGTCGGGCCCAGGACTGGTGAAGCCTTCGGAGACCCTGTCCCTCACCTGCACTGTCTCTGGTGGCTCCATCAGCGGTTACTACTGGAGCTGGATCCGCCAGCCCCCAGGGAAGGGACTGGAGTGGATTGGGAATATTGATGGTAATATTGCGGGCACCAACTACAACCCCTCCCTCAAGAGTCGAGTCACCATTTCAAAAGACACGTCCAAGAATCAGTTCTCCCTGAAGCTGAGCTCTGTGACCGCCGCGGACACGGCCGTGTATTACTGTGCGAGAA	QVQLQESGPGLVKPSETLSLTCTVSGGSISGYYWSWIRQPPGKGLEWIGNIDGNIAGTNYNPSLKSRVTISKDTSKNQFSLKLSSVTAADTAVYYCAR
IGHV4-67*02	CAGGTGCAGCTGCAGGAGTCGGGCCCAGCAGTGGTGAAGCCTTCGGAGACCCTGTCCCTCACCTGCGCTGTCTCTGGTGGCTCCATCAGCAGTAGTAACTGGTGGAGCTGGATCCGCCAGTCCCCAGGGAAGGGGCTGGAATGGATTGGGGGTATCTATGGTAGTGGTGGGAGCACCGAATACAACCCCTCCCTCAAGAGTCGAGTCACCATTTCAAAAGACACGTCCAAGAACCAGTTCTCCCTGAAGCTGAGCTCTGTGACCGCCGCGGACACCGCCGTGTATTACTGTGCGAGAGA	QVQLQESGPAVVKPSETLSLTCAVSGGSISSSNWWSWIRQSPGKGLEWIGGIYGSGGSTEYNPSLKSRVTISKDTSKNQFSLKLSSVTAADTAVYYCAR
IGHV4-72*01	CAGGTGCAGCTGCAGGAGTCGGGCCCAGGACTGGTGAAGCCTTCGGAGACCCTGTCCCTCACCTGCGCTGTCTCTGGTTACTCCATCAGCAGTGGTTACTACTGGGGCTGGATCCGTCAGCCCCCAGGGAAGGGACTGGAGTATATTGGGTATATCAGTGGTAGTAGTGGGAGCACCTACTACAACCCCTCCCTCAAGAGTCGAGTCACCATTTCAAAAGACACGTCCAAGAACCAGTTCTCCCTGAAGCTGAGCTCTGTGACCGCCGCGGACACGGCCGTGTATTACTGTGCGAGACA	QVQLQESGPGLVKPSETLSLTCAVSGYSISSGYYWGWIRQPPGKGLEYIGYISGSSGSTYYNPSLKSRVTISKDTSKNQFSLKLSSVTAADTAVYYCAR
IGHV4-79*01	CAGGTGCAGCTGCAGGAGTCGGGCCCAGGACTGGTGAAGCCTTCGGAGACCCTGTCCCTCACCTGCGCTGTCTCTGGTGGCTCCATCAGCGATGATTACTACTGGAGCTGGATCCGCCAGCCCCCAGGGAAGGGACTGGAGTGGATTGGGTACATCTATGGTAGTGGTGGGGGCACCAACTACAATCCCTCCCTCAAGAATCGAGTCACCATTTCAATAGACACGTCCAAGAACCAGTTCTCCCTGAAGCTGAGCTCTGTGACCGCCGCGGACACGGCCGTGTATTACTGTGCGAGAGA	QVQLQESGPGLVKPSETLSLTCAVSGGSISDDYYWSWIRQPPGKGLEWIGYIYGSGGGTNYNPSLKNRVTISIDTSKNQFSLKLSSVTAADTAVYYCAR
IGHV4-79*01_S2462	CAGGTGCAGCTGCAGGAGTCGGGCCCAGGACTGGTGAAGCCTTCGGAGACCTTGTCCCTCACCTGCGCTGTCTCTGGTGGCTCCATCAGCGATGATTACTACTGGAGCTGGATCCGCCAGCCCCCAGGGAAGGGACTGGAGTGGATTGGGTACATCTATGGTAGTGGTGGGGGCACCAACTACAATCCCTCCCTCAAGAATCGAGTCACCATTTCAATAGACACGTCCAAGAACCAGTTCTCCCTGAAGCTGAGCTCTGTGACCGCCGCGGACACGGCCGTGTATTACTGTGCGAGAGA	QVQLQESGPGLVKPSETLSLTCAVSGGSISDDYYWSWIRQPPGKGLEWIGYIYGSGGGTNYNPSLKNRVTISIDTSKNQFSLKLSSVTAADTAVYYCAR
IGHV4-93*01_S0054	CAGGTGCAGCTGCAGGAGTCGGGCCCAGGACTGGTGAAGCCTTCGGAGACCCTGTCCCTCACCTGCGCTGTCTCTGGTTACTCCATCAGCAGTGGTTATGGCTGGAGCTGGATCCGCCAGCCCCCAGGGAAGGGACTGGAGTGGATTGGGTACATCTCTTATAGTGGGAGCACCAGCTACAACCCGTCCCTCAAGAGTCGAGTCACCATTTCAAGAGACACGTCCAAGAACCAGTTCTCCCTGAAGCTGAGCTCTGTGACCGCCGCGGACACGGCCGTGTATTACTGTGCGAGAGA	QVQLQESGPGLVKPSETLSLTCAVSGYSISSGYGWSWIRQPPGKGLEWIGYISYSGSTSYNPSLKSRVTISRDTSKNQFSLKLSSVTAADTAVYYCAR
IGHV4-NL_1*02_S1702	CAGGTGCAGCTGCAGGAGTCGGGCCCAGGACTGGTGAAGCCTTCGGAGACCCTGTCCCTCACCTGCGCTGTCTCTGGTGGCTCTATCAGCAGTAGCTACTGGAGCTGGATCCGCCAGGCCCCAGGGAAGGGACTGGAGTGGATTGGGCGTATCGATAGTAGTGGGAGCACCTACTACAACCCCTCCCTCAAGAGTCGAGTCACCCTGTCAGTAGACACGTCCAAGAACCAGCTCTCCCTGAAGCTGAGCTCTGTGACCGCCGCGGACACGGCCGTGTATTACTGTGCGAGAGA	QVQLQESGPGLVKPSETLSLTCAVSGGSISSSYWSWIRQAPGKGLEWIGRIDSSGSTYYNPSLKSRVTLSVDTSKNQLSLKLSSVTAADTAVYYCAR
IGHV4-NL_16*01_S2138	CAGGTGCAGCTGCAGGAGTCGGGCCCAGGAGTGGTGAAGCCTTCGGAGACCCTGTCCCTCACCTGCGCTGTCTCTGGTGGCTCCATCAGCGATAGTTACCGGTGGAGCTGGATCCGCCAGCCCCCAGGGAAGGGACTGGAGTGGATTGGGTACATCTATGGTAGTAGTACGAGCACCAACTACAACCCCTCCCTCAAGAGTCGAGTCACCATTTCAAAAGACACGTCCAAGAACCAGTTCTCCTTGAAGCTGAGCTCTGTGACCGCCGCGGACACGGCCGTGTATTACTGTGCGAGAGA	QVQLQESGPGVVKPSETLSLTCAVSGGSISDSYRWSWIRQPPGKGLEWIGYIYGSSTSTNYNPSLKSRVTISKDTSKNQFSLKLSSVTAADTAVYYCAR
IGHV4-NL_19*01_S7753	CAGGTGCAGCTGCAGGAGTCGGGCCCTGGACTGGTGAAGCCTTCAGAGACCCTGTCCCTCACCTGCGCTGTCTCTGGTGGCTCCATCAGCGGTGGTTACTACTACTGGAGCTGGATCCGCCAGCCCCCAGGGAAGGGGCTGGAGTGGATTGGGGGTATCTATAGTAGTAGTGGGAATACCTACTACAACCCCTCCCTCAAGAGTCGAGTCACCATTTCAAGAGACACGTCCAAGAACCAGTTCTCCCTGAAGCTGAGCTCTGTGACCGCCGCGGACACGGCCGTGTATTACTGTGCGAGAGA	QVQLQESGPGLVKPSETLSLTCAVSGGSISGGYYYWSWIRQPPGKGLEWIGGIYSSSGNTYYNPSLKSRVTISRDTSKNQFSLKLSSVTAADTAVYYCAR
IGHV4-NL_20*01_S6186	CAGGTGCAGCTGCAGGAGTCGGGCCCAGGGCTGGTGAAGCCTTCGGAGACCCTGTCCCTCACCTGCGCTGTCTCTGGTTACTCCATCAGCAGTGGTTATGGCTGGGGCTGGATCCGCCAGCCCCCAGGGAAGGGACTGGAGTGGATTGGACAGATCTATGGTGGTAGTGGTAGCACCTACTACAACCCCTCCCTCAAGAGTCGAGTCACCGTTTCAAAAGACACGTCCAAGAACCAGTTCTCCCTGAAGCTGAGCTCTGTGACCGCCGCGGACACGGCCGTGTATTACTGTGCGAGAGA	QVQLQESGPGLVKPSETLSLTCAVSGYSISSGYGWGWIRQPPGKGLEWIGQIYGGSGSTYYNPSLKSRVTVSKDTSKNQFSLKLSSVTAADTAVYYCAR
IGHV4-NL_21*01_S0138	CAGGTGCAGCTGCAGGAGTCGGGCCCAGGACTGGTGAAGCCTTCGGAGACCCTGTCCCTCACCTGCGCTGTCTCTGGTTACTCCATCAGCAGTGGTTATGGCTGGAGCTGGATCCGCCAGCCCCCAGGGAAGGGGCTGGAGTGGATTGGGTATATCGGTGGTAGTAGTGGTAGCACCAACTACAACCCCTCCCTCAAGAGTCGAGTCACCATTTCAAAAGACACGTCCAAGAACCAGTTCTCCCTGAAGCTGAGCTCTGTGACCGCCGCGGACACGGCCGTGTATTACTGTGCGAGAGA	QVQLQESGPGLVKPSETLSLTCAVSGYSISSGYGWSWIRQPPGKGLEWIGYIGGSSGSTNYNPSLKSRVTISKDTSKNQFSLKLSSVTAADTAVYYCAR
IGHV4-NL_22*01_S9255	CAGGTGCAGCTGCAGGAGTCGGGCCCAGGACTGTTGAAGCCTTCAGAGACCCTGTCCCTCACCTGCGCTGTCTCTGGTGGCTCCATCAGCGGTGGTTATGGCTGGGGCTGGATCCGCCAGCCCCCAGGGAAGGGGCTGGAGTGGATTGGGAGTATCTATAGTAGTAGTGGGAACACCTACTACAACCCCTCCCTCAAGAGTCGAGTCACCATTTCAACAGACACGTCCAAGAACCAGTTCTCCCTGAAGCTGAGCTCTGTGACCGCCGCGGACACGGCCGTGTATTACTGTGCGAGAGA	QVQLQESGPGLLKPSETLSLTCAVSGGSISGGYGWGWIRQPPGKGLEWIGSIYSSSGNTYYNPSLKSRVTISTDTSKNQFSLKLSSVTAADTAVYYCAR
IGHV4-NL_24*01_S5833	CAGCTGCAGCTGCAGGAGTCAGGCCCAGGACTGGTGAAGCCTTCCGAGACCCTGTCCCTCACCTGCGCTGTCTCTGGTGGCTCCATCAGCGGTGGTTATGGCTGGAGCTGGATCCGCCAGCCCCCAGGGAAGGGGCTGGAGTGGATTGGGCATATCTTTGGTAGTATTGGGAGCACCTACTACAACCCCTCCCTCAAGAGTCGAGTCACCATTTCAACAGACACATCCAAGAACCAGTTCTCCCTGAAGCTGAGCTCTGTGACCGCCGCGGACACGGCCGTGTATTACTGTGCGAGAGA	QLQLQESGPGLVKPSETLSLTCAVSGGSISGGYGWSWIRQPPGKGLEWIGHIFGSIGSTYYNPSLKSRVTISTDTSKNQFSLKLSSVTAADTAVYYCAR
IGHV4-NL_25*01_S3305	CAGGTGCAGCTGCAGGAGTCGGGCCCAGGACTGGTGAAGCCTTCAGAGACCCTGTCCCTCACCTGCGCTGTCTCTGGAGGCTCTATCAGCAGTGGTTATGACTGGAGCTGGATCCGCCAGCCCCCAGGGAAGGGGCTGGAGTGGATTGGGTACATCTATGGTAGTAGTGGGAGCACCAACTACAACCCGTCCCTCAAGAATCGAGTCACCATTTCAAAAGACGCGTCCAAGAACCAGTTCTCCCTGAAGCTGAGCTCTGTGACCGCCGCGGACACGGCCGTGTATTACTGTGCGAGAGA	QVQLQESGPGLVKPSETLSLTCAVSGGSISSGYDWSWIRQPPGKGLEWIGYIYGSSGSTNYNPSLKNRVTISKDASKNQFSLKLSSVTAADTAVYYCAR
IGHV4-NL_25*01_S9478	CAGGTGCAGCTGCAGGAGTCGGGCCCAGGACTGGTGAAGCCTTCAGAGACCCTGTCCCTCACCTGCGCTGTCTCTGGAGGCTCTATCAGCAGTGGTTATGACTGGAGCTGGATCCGCCAGCCCCCAGGGAAGGGGCTGGAGTGGATTGGGTATATCTATGGTAGTAGTGGGAGCACCAACTACAACCCGTCCCTCAAGAATCGAGTCACCATTTCAAAAGACGCGTCCAAGAACCAGTTCTCCCTGAAGCTGAGCTCTGTGACCGCCGCGGACACGGCCGTGTATTACTGTGCGAGAGA	QVQLQESGPGLVKPSETLSLTCAVSGGSISSGYDWSWIRQPPGKGLEWIGYIYGSSGSTNYNPSLKNRVTISKDASKNQFSLKLSSVTAADTAVYYCAR
IGHV4-NL_31*01_S7693	CAGGTGCAGCTGCAGGAGTCGGGCCCAGGACTGGTGAAGCCTTCGGAGACCCTGTCCCTCACCTGCGCTGTCTCTGGTGGCTCCTTCAGCAGTTACTGGTGGGGCTGGATCCGCCAGCCCCCAGGGAAGGGGCTGGAGTGGATTGGGAGTATCTATGGTAGTAGTGGGAGCACCGAATACAACCCCTCCCTCAAAAGTCGAGCCACCATTTCAAGAGACACGTCCAAGAACCAGTTCTCCCTGAAGCTGAGCTCTGTGACCGCCGCGGACACGGCCGTGTATTACTGTGCGAGAGA	QVQLQESGPGLVKPSETLSLTCAVSGGSFSSYWWGWIRQPPGKGLEWIGSIYGSSGSTEYNPSLKSRATISRDTSKNQFSLKLSSVTAADTAVYYCAR
IGHV4-NL_38*01_S0272	CAGGTGCAGCTGCAGGAGTCGGGCCCAGGACTGGTGAAGCCTTCGGAGACCCTGTCCCTCACCTGCGCTGTCTCTGGTGGCTCCATCAGCGGTGGTTACTACTGGGGCTGGATCCGCCAACACCCAGGGAAGGGGCTGGAGTGGATTGGGAGTATCTATGATAGTAGTGGGAGCACCTACTACAACCCCTCCCTCAAGAGTCGAGTCACCATTTCAAAAGACACGTCCAAGAACCAGTTCTCCCTGAAGCTGAGCTCTGTGACCGCCGCGGACACGGCCGTGTATTACTGTGCGAGAGA	QVQLQESGPGLVKPSETLSLTCAVSGGSISGGYYWGWIRQHPGKGLEWIGSIYDSSGSTYYNPSLKSRVTISKDTSKNQFSLKLSSVTAADTAVYYCAR
IGHV4-NL_4*01_S8866	CAGGTGCAGCTGCAGGAGTCGGGCCCAGGACTGGTGAAGCCTTCGGAGACCCTGTCCCTCACCTGCGCTGTCTCTGGTTACTCCATCAGCAGTGGTTATGGCTGGAGCTGGATCCGCCAGCCCCCAGGGAAGGGGCTGGAGTGGATTGGACGTATCTATGGTAGTGGTGGGAGCACCGACTACAACCCGTCCCTCAAGAGTCGAGTCACCATTTCAACAGACACGTCCAAGAACCAGTTCTCCCTGAAGCTGAGCTCTGTGACCACCGCGGACACGGCCGTGTATTACTGTGCGAGAGA	QVQLQESGPGLVKPSETLSLTCAVSGYSISSGYGWSWIRQPPGKGLEWIGRIYGSGGSTDYNPSLKSRVTISTDTSKNQFSLKLSSVTTADTAVYYCAR
IGHV4-NL_5*01_S5158	CAGGTGCAGCTGCAGGAGTCGGGCCCAGGACTGGTGAAGCCTTCGGAGACCCTGTCCCTCACCTGCGCTGTCTCTGGTGGCTCCATCAGCAGTAACTACTGGAGCTGGATCCGCCAGTCCCCAGGGAAGGGGCTGGAGTGGATTGGGTATATCTATGGTGGTAGTGGGAGCACCAGCTACAACCCCTCCCTCAAGAGTCGAGTCACCATTTCAACAGACACGTCCAAGAACCAGTTTTCCCTGAAGCTGAGCTCTGTGACCGCCGCGGACACCGCCGTGTATTACTGTGCGAGATA	QVQLQESGPGLVKPSETLSLTCAVSGGSISSNYWSWIRQSPGKGLEWIGYIYGGSGSTSYNPSLKSRVTISTDTSKNQFSLKLSSVTAADTAVYYCAR
IGHV4-NL_5*01_S5491	CAGGTGCAGCTGCAGGAGTCGGGCCCAGGACTGGTGAAGCCTTCGGAGACCCTGTCCCTCACCTGCGCTGTCTCTGGTTACTCCATCAGCAGTAACTACTGGAGCTGGATCCGCCAGCCCCCAGGGAAGGGGCTGGAGTGGATTGGGTATATCTATGGTAGTAGTGGGAGCACCTACTACAACCCCTCCCTCAAGAGTCGAGTCACCATTTCAACAGACACGTCCAAGAACCAGTTCTCCCTGAAGCTGAGCTCTGTGACCGCCGCAGACACGGCCGTGTATTACTGTGCGAGAGA	QVQLQESGPGLVKPSETLSLTCAVSGYSISSNYWSWIRQPPGKGLEWIGYIYGSSGSTYYNPSLKSRVTISTDTSKNQFSLKLSSVTAADTAVYYCAR
IGHV4-NL_5*01_S9199	CAGGTGCAGCTGCAGGAGTCGGGCCCAGGACTGGTGAAGCCTTCGGAGACCCTGTCCCTCACCTGCGCTGTCTCTGGTTACTCCATCAGCAGTAACTACTGGAGCTGGATCCGCCAGCCCCCAGGGAAGGGGCTGGAGTGGATTGGGTATATCTATGGTAGTAGTGGGAGCACCTACTACAACCCCTCCCTCAAGAGTCGAGTCACCATTTCAACAGACACGTCCAAGAACCAGTTCTCCCTGAAGCTGAGCTCTGTGACCGCCGCAGACACGGCCGTGTATTACTGTGCGAGATA	QVQLQESGPGLVKPSETLSLTCAVSGYSISSNYWSWIRQPPGKGLEWIGYIYGSSGSTYYNPSLKSRVTISTDTSKNQFSLKLSSVTAADTAVYYCAR
IGHV5-15*01_S3228	GAGGTGCAGCTGGTGCAGTCTGGAGCAGAGGTGAAAAGGCCCGGGGAGTCTCTGAAGATCTCCTGTAAGACTTCTGGATACAGCTTTACCAGCTACTGGATCAGCTGGGTGCGCCAGATGCCCGGGAAAGGCCTGGAGTGGATGGGGGCGATTGATCCTAGTGATTCTGATACCAGATACAGCCCGTCCTTCCAAGGCCAGGTCACCATCTCAGCCGACAAGTCCATCAGCACCGCCTACCTGCAGTGGAGCAGCCTGAAGGACTCGGACTCCGCCACGTATTACTGTGCGAAAGA	EVQLVQSGAEVKRPGESLKISCKTSGYSFTSYWISWVRQMPGKGLEWMGAIDPSDSDTRYSPSFQGQVTISADKSISTAYLQWSSLKDSDSATYYCAK
IGHV5-157*01	GAGGTGCAGCTGGTGCAGTCTGGAGCAGAGGTGAAAAGGCCCGGGGAGTCTCTGAGGATCTCCTGTAAGACTTCTGGATACAGCTTTACCAGCAGCTGGATCAGCTGGGTGCGCCAGATGCCCGGGAAAGGCCTGGAGTGGATGGGGAGCATCTATCCTGGTGATTCTGATACCAGATACAACCCGTCCTTCCAAGGCCACGTCACTATCTCAGCCGACAAGTCCATCAGCACCACCTACCTGCAGTGGAGCAGCCTGAAGGCCTCGGACACCGCCACGTATTACTGTGCGAAAGT	EVQLVQSGAEVKRPGESLRISCKTSGYSFTSSWISWVRQMPGKGLEWMGSIYPGDSDTRYNPSFQGHVTISADKSISTTYLQWSSLKASDTATYYCAK
IGHV5-157*01_S5960	GAGGTGCAGCTGGTGCAGTCTGGAGCAGAGGTGAAAAGGCCCGGGGAATCTCTGAGGATCTCCTGTAAGACTTCTGGATACAGCTTTACCGGCAGCTGGATCAGCTGGGTGCGCCAGATGCCCGGGAAAGGCCTGGAGTGGATGGGGAGCATCTATCCTGGTGATTCTGATACCAGATACAACCCGTCCTTCCAAGGCCACGTCACTATCTCAGCCGACAAGTCCATCAGCACCACCTACCTGCAGTGGAGCAGCCTGAAGGCCTCGGACACTGCCACGTATTACTGTGCGAAAGT	EVQLVQSGAEVKRPGESLRISCKTSGYSFTGSWISWVRQMPGKGLEWMGSIYPGDSDTRYNPSFQGHVTISADKSISTTYLQWSSLKASDTATYYCAK
IGHV6-1*02	CAGGTGCAGCTGCAGGAGTCAGGTCCAGGACTGGTGAAGCCCTCACAGACCCTGTCACTCACCTGTGCCATCTCCGGGGACAGTGTCTCTAGCAACAGTGCTACTTGGAACTGGATCAGGCAGTCGCCATCGAGAGGCCTTGAGTGGCTGGGAAGGACATACTACAGGTCCAAGTGGTATAATGATTATGCACAATCTGTGCAAAATCGAATAAGCATCAACCCAGACACATCCAAGAACCAGTTCTCCCTGCAGCTGAACTCTGTGACCCCCGAGGACATGGCCGTGTATTACTGTGCAAGAGA	QVQLQESGPGLVKPSQTLSLTCAISGDSVSSNSATWNWIRQSPSRGLEWLGRTYYRSKWYNDYAQSVQNRISINPDTSKNQFSLQLNSVTPEDMAVYYCAR
IGHV7-86*01_S7948	CAGGTGCAGCTGGTGCAGTCTGGGGCTGAGGTGAAGCAGCCGGGGGCCTCAGTGAAGGTCTCCTGCAAGGCTTCTGGATACACCTTCACTAGCTATTCTATGCATTGGGTGCGACAGGCCCATGGACAACGGCTTGAGTGGATGGGATGGATCAACACCGACACTGGGAACCCAACATATGCCCAGGGCTTCAAAGAACGATTTACCTTCTCCATGGACACCTCTATCAGCACGGCATATCTGCAGATCAGCAGCCTAAAGGCTGAGGACACGGCCGTGTATTACTGTGCAAGACA	QVQLVQSGAEVKQPGASVKVSCKASGYTFTSYSMHWVRQAHGQRLEWMGWINTDTGNPTYAQGFKERFTFSMDTSISTAYLQISSLKAEDTAVYYCAR
IGHJ1-1*01	GCTGAATACTTCGAGTTCTGGGGCCAGGGCGCCCTGGTCACCGTCTCCTCAG	AEYFEFWGQGALVTVSS
IGHJ2*01	CTACTGGTACTTCGATCTCTGGGGCCCTGGCACCCCAATCACCATCTCCTCAG	YWYFDLWGPGTPITISS
IGHJ2*01_S5087	CTACTGGTACTTCGATATCTGGGGCCCTGGCACCCCAATCACCATCTCCTCAG	YWYFDIWGPGTPITISS
IGHJ3-2*01	TGATGCTTTTGATTTCTGGGGCCAAGGGCTCAGGGTCACCGTCTCTTCAG	DAFDFWGQGLRVTVSS
IGHJ4-3*01	ACTACTTTGACTACTGGGGCCAGGGAGTCCTGGTCACCGTCTCCTCAG	YFDYWGQGVLVTVSS
IGHJ5-4*02	ACAACTGGTTCGATGTCTGGGGCCCGGGAGTCCTGGTCACCGTCTCCTCAG	NWFDVWGPGVLVTVSS
IGHJ5-4*03	ACAACCGGTTCGATGTCTGGGGCCCGGGAGTCCTGGTCACCGTCTCCTCAG	NRFDVWGPGVLVTVSS
IGHJ5-5*02	ACAACTCATTGGATGTCTGGGGCCAGGGAGTTCTGGTCACCGTCTCCTCAG	NSLDVWGQGVLVTVSS
IGHJ6-6*01	ATTACTACGGTTTGGATTCCTGGGGCCAAGGGGTCGTCGTCACCGTCTCCTCAG	YYGLDSWGQGVVVTVSS

## Sheet: H03_IGK
Allele	Sequence (NT)	Sequence (AA)
IGKV1-18*01_S1749_kim	GACATCCAGATGACCCAGTCTCCATCGTCCCTGTCTGCATCTGTAGGAGACAAAGTCACCATCACTTGCCGAGCCAGTCAGGGTATTAGCAGCTGGTTAGCCTGGTATCAGCAGAAACCAGGGAAAGCCCCTAAGCTCCTGATCTATAAGGCGTCCAGTTTGGCAAGTGGGGTCCCATCAAGGTTCAGCGGCAGTGGATCTGGGACGGATTACACTCTCACCATCAGCAGCCTGCAGCCTGAAGATTTTGCAACTTATTATTGTCAACAGGGTTACAATACCCCTCC	DIQMTQSPSSLSASVGDKVTITCRASQGISSWLAWYQQKPGKAPKLLIYKASSLASGVPSRFSGSGSGTDYTLTISSLQPEDFATYYCQQGYNTP
IGKV1-22*01_S3405_kim	GACATCCAGATGACCCAGTCTCCATCCTCCCTGTCTGCATCTGTAGGAGACACAGTCACCATCACTTGCCGGGCGAGTCAGAGTATTAGCAGCTGGTTAGACTGGTATCAGCAGAAACCAGGGAACGCCCCTAAGCTCCTGATCTATAAGGCATCCAGTTTGCAAAGTGGGGTCCCCTCAAGGTTCAGCGGCAGTGGATCTGGGACAGATTTCACTCTCACCATCAGCAGCCTGCAGCCTGAAGATTTTGCAACTTATTACTGTCTACAGTATAGCAGTAGCCCTCC	DIQMTQSPSSLSASVGDTVTITCRASQSISSWLDWYQQKPGNAPKLLIYKASSLQSGVPSRFSGSGSGTDFTLTISSLQPEDFATYYCLQYSSSP
IGKV1-22*01_S6268_kim	GACATCCAGATGACCCAGTCTCCATCCTCCCTGTCTGCATCTGTAGGAGACACAGTCACCATCACTTGCCGGGCGAGTCAGAGTATTAGCAGCTGGTTAGACTGGTATCAGCAGAAACCAGGGAAAGCCCCTAAGCTCCTGATCTATAAGGCATCCAGTTTGCAAAGTGGGGTCCCATCAAGGTTCAGCGGCAGTGGATCTGGGACAGATTTCACTCTCACCATCAGCAGCCTGCAGCCTGAAGATTTTGCAACTTATTACTGTCTACAGTATAGCAGTAGCCCTCC	DIQMTQSPSSLSASVGDTVTITCRASQSISSWLDWYQQKPGKAPKLLIYKASSLQSGVPSRFSGSGSGTDFTLTISSLQPEDFATYYCLQYSSSP
IGKV1-22*01_kim	GACATCCAGATGACCCAGTCTCCATCCTCCCTGTCTGCATCTGTAGGAGACACAGTCACCATCACTTGCCGGGCGAGTCAGAGTATTAGCAGCTGGTTAGCCTGGTATCAGCAGAAACCAGGGAAAGCCCCTAAGCTCCTGATCTATAAGGCATCCAGTTTGCAAAGTGGGGTCCCCTCAAGGTTCAGCGGCAGTGGATCTGGGACAGATTTCACTCTCACCATCAGCAGCCTGCAGCCTGAAGATTTTGCAACTTATTACTGTCTACAGTATAGCAGTAGCCCTCC	DIQMTQSPSSLSASVGDTVTITCRASQSISSWLAWYQQKPGKAPKLLIYKASSLQSGVPSRFSGSGSGTDFTLTISSLQPEDFATYYCLQYSSSP
IGKV1-28*01_S8814_kim	GACATCCAGATGACCCAGTCTCCTTCCTCCCTGTCTGCTTCTGTAGGAGACACAGTCACCATCACTTGCCGGGCAAGTCAGGGTATTAGCAGTTATTTAAATTGGTTTCAGCAGAAACCAGGGAAAGCCCCTAAGCTCCTGATCTATGCTGCATCCAGTTTGGAAAGCGGGGTCCCATCAAGGTTCAGCGGCAGTGGATCTGGGACAGAATTCACTCTCACCATCAGCAGCCTGCAGCCTGAAGATTTCGCAGCTTATTACTGTCTACAGCATAATAGTTACCCTCC	DIQMTQSPSSLSASVGDTVTITCRASQGISSYLNWFQQKPGKAPKLLIYAASSLESGVPSRFSGSGSGTEFTLTISSLQPEDFAAYYCLQHNSYP
IGKV1-28*03_S6159	GACATCCAGATGACCCAGTCTCCTTCCTCCCTGTCTGCTTCTGTAGGAGACACTGTCACCATCACTTGCAGGGCAAGTCAGGGTATTAGCAGTTATTTAAATTGGTTTCAGCAGAAACCAGGGAAAGCCCCTAAGCTCCTGATCTATGCTGCAACCACTTTGCAAAGTGGGGTCCCATCAAGGTTCAGCGGCAGTGGATCTGGGACAGAATTCACTCTCACCATCAGCAGCCTGCAGCCTGAAGATTTCGCAGCTTATTACTGTCTACAGCATAATAGTTACCCTCC	DIQMTQSPSSLSASVGDTVTITCRASQGISSYLNWFQQKPGKAPKLLIYAATTLQSGVPSRFSGSGSGTEFTLTISSLQPEDFAAYYCLQHNSYP
IGKV1-32*02_S1522	GACATTCAGATGTCCCAGTCTCCATCCTCCCTGTCTGCATCTGTAGGAGACAGAGTCACCATCACTTGCCGGGCAAGTCAGGGCATTAGCAGTTATTTAAATTGGTATCAGCAGAAACCGGGGAAAGCCCCTAAGCTCCTGATCTATTATGCAAACAGTTTGGCAAGTGGGGTCCCATCAAGGTTCAGCGGCAGTGGATCTGGGACAGATTTCACTCTCACCATCAGCAGCCTGCAGCCTGAAGATTTTGCAACTTATTACTGTCAACAGGGTAATAGTAACCCTCC	DIQMSQSPSSLSASVGDRVTITCRASQGISSYLNWYQQKPGKAPKLLIYYANSLASGVPSRFSGSGSGTDFTLTISSLQPEDFATYYCQQGNSNP
IGKV1-32*03_S8344_kim	GACATTCAGATGTCCCAGTCTCCATCCTCCCTGTCTGCTTCTGTAGGAGACAGAGTCACCATCACTTGCCGGGCAAGTCAGGGCATTAGCAATGCTTTAGCCTGGTATCAGCAGAAACCAGGGAAAGCCCCTAAGCTCCTGATCTATTATGCAAACAGTTTGGCAAGTGGGGTCCCATCAAGGTTCAGCGGCAGTGGATCTGGGACGGATTACACTCTCACCATCAGCAGCCTGCAGCCTGAAGATTTTGCAACTTATTACTGTCAACAGGGTTACAGTACCCCTCC	DIQMSQSPSSLSASVGDRVTITCRASQGISNALAWYQQKPGKAPKLLIYYANSLASGVPSRFSGSGSGTDYTLTISSLQPEDFATYYCQQGYSTP
IGKV1-33*01_S4001_kim	GACATCCAGATGACCCAGTCTCCATCCTCCCTGTCTGCTTCTGTAGGAGACAAAGTCACCATCACTTGCCGAGCCAGTCAGGGCATTAGCAATGCTTTAGCCTGGTATCAGCAGAAACCAGGGAAAGCCCCTAAGCTCCTGATCTATGCTGCATCCAGTTTGCAAAGTGGGGTCCCATCAAGGTTCAGCGGCAGTGGATCTGGGACAGATTTCACTCTCACCATCAGCAGCCTGCAGCCTGAAGATTTTGCAGTTTATTACTGTCAACAGCGTAATAGTTACCCTCC	DIQMTQSPSSLSASVGDKVTITCRASQGISNALAWYQQKPGKAPKLLIYAASSLQSGVPSRFSGSGSGTDFTLTISSLQPEDFAVYYCQQRNSYP
IGKV1-37*01_S6239_kim	GACATCCAGATGACCCAGTCTCCATCCTCCCTGTCTGCATCTGTAGGAGACAGAGTCACCATCACTTGTCGGGCAAGTCAGGGCATTAGCAGTTATTTAGCGTGGTATCAGCAGAAACCAGGGAAAGCCCCGAAGCCCCTGATCTATTACGCATCCAATTTGGAAAGTGGGGTCCCATCAAGGTTCAGCGGCAGTGGATCTGGGACAGAATTCACTCTCACCATCAGCAGCCTGCAGTCTGAAGATTTTGCAGTTTATTACTGTCAACAGTATAACAGTGACCCTCC	DIQMTQSPSSLSASVGDRVTITCRASQGISSYLAWYQQKPGKAPKPLIYYASNLESGVPSRFSGSGSGTEFTLTISSLQSEDFAVYYCQQYNSDP
IGKV1-37*01_S9397_kim	GACATCCAGATGACCCAGTCTCCATCCTCCCTGTCTGCATCTGTAGGAGACACAGTCACCATCACTTGTCGGGCAAGTCAGGGCATTAGCAGTTATTTAGCGTGGTATCAGCAGAAACCAGGGAAAGCCCCGAAGCCCCTGATCTATTACGCATCCAATTTGGAAAGTGGGGTCCCATCAAGGTTCAGCGGCAGTGGATCTGGGACAGAATTCACTCTCACCATCAGCAGCCTGCAGCCTGAAGATTTTGCAACTTATTACTGTCAACAGTATAACAGTGCCCCTCC	DIQMTQSPSSLSASVGDTVTITCRASQGISSYLAWYQQKPGKAPKPLIYYASNLESGVPSRFSGSGSGTEFTLTISSLQPEDFATYYCQQYNSAP
IGKV1-38*01_S0982	GACATTCAGTTGACCCAGTCTCCATCCTCCCTGTCTGCATCTGTAGGAGACAGAGTCACCATCACTTGTCGGGCGAGTCAGGGCATTAGCAGTTATTTAGCCTGGTATCAGCAGAAATCAGGGAAAGCCCCTAAGCTCCTGATCTATGATGCATCCAATTTGCAAAGTGGGGTCCCATCAAGGTTCAGCGGCAGTGGATCTGGGACAGAATTCACTCTCACCATCAGCAGCCTGCAGCCTGAAGATTTTGCAACTTATTACTGTCAACAGCGTAATAGTTACCCTCC	DIQLTQSPSSLSASVGDRVTITCRASQGISSYLAWYQQKSGKAPKLLIYDASNLQSGVPSRFSGSGSGTEFTLTISSLQPEDFATYYCQQRNSYP
IGKV1-38*01_S8655	GACATTCAGATGACCCAGTCTCCATCCTCCCTGTCTGCTTCTGTAGGAGACAGAGTCACCATCACTTGTCGGGCAAGTCAGGGCATTAGCAGTTATTTAGCCTGGTATCAGCAGAAACCAGGGAAAGCCCCTAAGCTCCTGATCTATGATGCATCCAATTTGCAAAGTGGGGTCCCATCAAGGTTCAGCGGCAGTGGATCTGGGACAGATTTCACTCTCACCATCAGCAGTCTGCAGCCTGAAGATTTTGCAGTTTATTACTGTCAACAGCGTAATAGTTACCCTCC	DIQMTQSPSSLSASVGDRVTITCRASQGISSYLAWYQQKPGKAPKLLIYDASNLQSGVPSRFSGSGSGTDFTLTISSLQPEDFAVYYCQQRNSYP
IGKV1-41*01_S3753_kim	GACATCCAGATGACCCAGTCTCCATCTTCCCTGTCTGCATCTGTAGGAGACAGAGTCACCATCACTTGCAGGGCAAGTCAGGGCATTAGCAATGATTTAAATTGGTATCAGCAGAAACCAGGAAAAGCTCCTAAGCTCCTGATCTATGCTGCATCCAGTTTGGAAAGTGGGGTCCCATCAAGGTTCAGCGGCAGTGGATCTGGGACAGATTTCACTCTCACCATCAGCAGCCTGCAGCCTGAAGATTTTGCAACTTATTATTGTCAACCGTTTAAAAATTACCTTTC	DIQMTQSPSSLSASVGDRVTITCRASQGISNDLNWYQQKPGKAPKLLIYAASSLESGVPSRFSGSGSGTDFTLTISSLQPEDFATYYCQPFKNYL
IGKV1-41*01_S6239	GACATCCAGATGACCCAGTCTCCATCTTCCCTGTCTGCATCTGTAGGAGACAGAGTCACCATCACTTGCAGGGCAAGTCAGACCATTAGCAATTATTTAAGTTGGTATCAGCAGAAACCAGGAAAAGCTCCTAAGCTCCTGATCTATGCTGCATCCAGTTTGCAAAGTGGGGTCCCATCAAGGTTCAGCGGCAGTGGATCTGGGACAGTATTCACTCTCACCATCAGCAGCCTGCAGCCTGAAGATTTTGCAACTTATTATTGTCAACCGTTTAAAAATTACCTTTC	DIQMTQSPSSLSASVGDRVTITCRASQTISNYLSWYQQKPGKAPKLLIYAASSLQSGVPSRFSGSGSGTVFTLTISSLQPEDFATYYCQPFKNYL
IGKV1-43*01_S3691_kim	GACATCCAGATGACCCAGTCTCCATCTTCCCTGTCTGCATCTGTAGGAGACAGAGTCACCATCACTTGCAGGGCAAGTCAGGGCATTAGCAATTATTTAAATTGGTATCAGCAGAAACCAGGAAAAGCTCCTAAGCGCCTGATCTATGCTGCATCCAGATTGGAAAGTGGGGTCCCATCAAGGTTCAGCGGCAGTGGATCTGGGACAGATTTCACTCTCACCATCAGCAGCCTGCAGCCTGAAGATTTTGCAACTTATTACTGTCAACAGTATAATAGTTACCCTCC	DIQMTQSPSSLSASVGDRVTITCRASQGISNYLNWYQQKPGKAPKRLIYAASRLESGVPSRFSGSGSGTDFTLTISSLQPEDFATYYCQQYNSYP
IGKV1-43*01_S5004_kim	GACATCCAGATGACCCAGTCTCCATCTTCCCTGTCTGCATCTGCAGGAGACAGAGTCACCATCACTTGCAGGGCAAGTCAGGGCATTAGCACTTATTTAAATTGGTATCAGCAGAAACCAGGAAAAGCTCCTAAGCGCCTGATCTATGCTGCATCCAGTTTGGAAAGTGGGGTCCCATCAAGGTTCAGCGGCAGTGGATCTGGGACAGAATTCACTCTCACCATCAGCAGCCTGCAGCCTGAAGATTTTGCAACTTATTACTGTCTACAGTATAATAGTAACCCTCC	DIQMTQSPSSLSASAGDRVTITCRASQGISTYLNWYQQKPGKAPKRLIYAASSLESGVPSRFSGSGSGTEFTLTISSLQPEDFATYYCLQYNSNP
IGKV1-43*02_kim	GACATCCAGATGACCCAGTCTCCATCTTCCCTGTCTGCATCTGTAGGAGACAGAGTCACCATCACTTGCAGGGCAAGTCAGGGCATTAGCACTTATTTAAATTGGTATCAGCAGAAACCAGGAAAAGCTCCTAAGCGCCTGATCTATGCTGCATCCAGTTTGGAAAGTGGGGTCCCATCAAGGTTCAGTGGCAGTGGATCTGGGACAGATTTCACTCTCACCATCAGCAGCCTGCAGCCTGAAGATTTTGCAACTTATTACTGTCTACAGTATAACAGTGACCCTCC	DIQMTQSPSSLSASVGDRVTITCRASQGISTYLNWYQQKPGKAPKRLIYAASSLESGVPSRFSGSGSGTDFTLTISSLQPEDFATYYCLQYNSDP
IGKV1-44*02_S2697_kim	GACATCCAGATGACCCAGTCTCCATCTTCCTTATCTGCATCTGTAGGAGACAGAGTCACCATCACTTGTCGGGCTAGTCAGACCATTAGCAGTTATTTAGCCTGGTATCAGCAGAAACCAGGGAAAGTCCCTAAGCTCCTGATCTATGCTGCATCCAGTTTGGAAAGCGGGGTCCCATCTCGGTTCAGCGGCAGTGGATCTGGGACAGAATTCACTCTCACCATCAGCAGCCTGCAGCCTGAAGATTTTGCAACTTATTACTGTCAACAGCATAATAGTCACCCTCC	DIQMTQSPSSLSASVGDRVTITCRASQTISSYLAWYQQKPGKVPKLLIYAASSLESGVPSRFSGSGSGTEFTLTISSLQPEDFATYYCQQHNSHP
IGKV1-66*01_S1426_kim	GACATCCAGATGACGCAGTCTCCATCCTCCCTGTCTGCATCTGTAGGAGACAGAGTCACCATCACTTGCCGGGCGAGTCAGGGCATTAACAATTATTTAAGTTGGTATCAGCAGAAACCAGGGAAAGCCCCTAAGCCCCTGATCTATTATGCATCCAGTTTGGAAACAGGGGTACCATCAAGGTTCAGTGGAAGTAGATCTGGGACAGATTATACTCTCACCATCAGCAGTCTGCAGCCTGAAGATATTGCAACATATTACTGTCAACAGTATAATAATTCCCCTCC	DIQMTQSPSSLSASVGDRVTITCRASQGINNYLSWYQQKPGKAPKPLIYYASSLETGVPSRFSGSRSGTDYTLTISSLQPEDIATYYCQQYNNSP
IGKV1-66*01_S2281_kim	GACATCCAGATGACGCAGTCTCCATCCTCCCTGTCTGCATCTGTAGGAGACAGAGTCACCATCACTTGCCGGGCGAGTCAGGGCATTAACCATTATTTAAGTTGGTATCAGCAGAAACCAGGGAAAGCCCCTAAGCCCCTGATCTATTATGCATCCAGTTTGGAAACAGGGGTCCCATCAAGGTTCAGTGGAAGTGGATCTGGGACAGATTATACTCTCACCATCAGCAGTCTGCAGCCTGAAGATATTGCAACATATTACTGTCAACAGTATAATAATTCCCCTCC	DIQMTQSPSSLSASVGDRVTITCRASQGINHYLSWYQQKPGKAPKPLIYYASSLETGVPSRFSGSGSGTDYTLTISSLQPEDIATYYCQQYNNSP
IGKV1-66*01_S9641_kim	GACATCCAGATGACGCAGTCTCCATCCTCCCTCTCTGCATCTGTAGGAGACAGAGTCACCATCACTTGCCGGGCGAGTCAGGGCATTAACAATTATTTAAGTTGGTATCAGCAGAAACCAGGGAAAGCCCCTAAGCGCCTGATCTATTATGCATCCAGTTTGGAAACAGGGGTCCCATCAAGGTTCAGTGGAAGTGGATCTGGGACAGATTATACTCTCACCATCAGCAGTCTGCAGCCTGAAGATATTGCAACATATTACTGTCAACAGTATGATAATTTCCCTCC	DIQMTQSPSSLSASVGDRVTITCRASQGINNYLSWYQQKPGKAPKRLIYYASSLETGVPSRFSGSGSGTDYTLTISSLQPEDIATYYCQQYDNFP
IGKV1-69*01_S4757_kim	GACATCCAGATGACCCAGTCTCCATCCTCCCTGTCTGCATCTGTAGGAGACAGAGTCACCATCACTTGCAGAGCCAGTCAGGGTATCAGCAACTGGTTGGCCTGGTATCAACAGAAACCAGGGAAAGCCCCTAAGCTCCTGATCTATAGGGCATCCAATTTGGAAACAGGGGTCCCATCAAGGTTCAGTGGAAGTGGATCTGGGACAGATTTCACTCTCACCATCAGCAGCCTGCAGCCTGAAGATATCGCAACATATTACTGTCAACAGCATGATAATTCCCCTCC	DIQMTQSPSSLSASVGDRVTITCRASQGISNWLAWYQQKPGKAPKLLIYRASNLETGVPSRFSGSGSGTDFTLTISSLQPEDIATYYCQQHDNSP
IGKV1-69*01_S6814	GACATCCAGATGACCCAGTCTCCATCCTCCCTGTCTGCATCTGTAGGAGACAAAGTCACCATCACTTGCAGAGCCAGTCAGGGTATTAGCAACTGGTTGGCCTGGTATCAACAGAAACCAGGGAAAGCCCCTAAGCTCCTGATCTATAGGGCATCCAATTTGGAAACAGGGGTCCCATCAAGGTTCAGTGGAAGTGGATCTGGGACAGATTTCACTCTCACCATCAGCAGCCTGCAGCCTGAAGATATCGCAACATATTACTGTCAACAGCATGATAATTCCCCTCC	DIQMTQSPSSLSASVGDKVTITCRASQGISNWLAWYQQKPGKAPKLLIYRASNLETGVPSRFSGSGSGTDFTLTISSLQPEDIATYYCQQHDNSP
IGKV1-69*01_kim	GACATCCAGATGACCCAGTCTCCATCCTCCCTGTCTGCATCTGTAGGAGACAGAGTCACCATCACTTGCAGAGCCAGTCAGGGTATTAGCAACTGGTTGGCCTGGTATCAACAGAAACCAGGGAAAGCCCCTAAGCTCCTGATCTATAGGGCATCCAATTTGGAAACAGGGGTCCCATCAAGGTTCAGTGGAAGTGGATCTGGGACAGATTTCACTCTCACCATCAGCAGCCTGCAGCCTGAAGATATCGCAACATATTACTGTCAACAGCATGATAATTCCCCTCC	DIQMTQSPSSLSASVGDRVTITCRASQGISNWLAWYQQKPGKAPKLLIYRASNLETGVPSRFSGSGSGTDFTLTISSLQPEDIATYYCQQHDNSP
IGKV1-74*01_S5641_kim	GACATCCAGATGACCCAGTCTCCATCCTCCCTGTCTGCATCTGTAGGAGACAGAGTCACCATCTCTTGCCGGGCAAGTCAGAACATTTATAGTAATTTAGCGTGGTATCAGCAGAAACCAGGGAAAACTCCTAAGCTCCTGATCTATGCTGCATCCAGTTTGCAAAGTGGGATTCCCTCTCGGTTCAGCGGCAGTGGATCTGGGACAGATTACACTCTCACCATCAGCAGCCTGCAGCCTGAAGATGTTGCAACTTATTACTGTCAGCATGGTTATGGTACCCCTCC	DIQMTQSPSSLSASVGDRVTISCRASQNIYSNLAWYQQKPGKTPKLLIYAASSLQSGIPSRFSGSGSGTDYTLTISSLQPEDVATYYCQHGYGTP
IGKV1-94*01_S1345_kim	GACATCCAGATGACCCAGTCTCCATCCTCCCTGTCTGCATCTGTAGGAGACAGAGTCACCGTCACTTGCCGGGCGAGTCAAGGCATTAACAAGGAGTTAAGCTGGTATCAGCAGAAACCAGGGAAAGCCCCTACACTCCTGATCTATGCTGCATCCAGTTTGCAGACGGGGGTCTCATCTCGGTTCAGCGGCAGTGGATCTGGGACAGATTACACTCTCACCATCAGCAGCCTGCAGCCTGAAGATGTTGCAACTTATTACTGTCTACAGGATTATACTACTCCGTC	DIQMTQSPSSLSASVGDRVTVTCRASQGINKELSWYQQKPGKAPTLLIYAASSLQTGVSSRFSGSGSGTDYTLTISSLQPEDVATYYCLQDYTTP
IGKV1-94*01_S1346_kim	GACATCCAGATGACCCAGTCTCCATCCTCCCTGTCTGCATCTGTAGGAGACACAGTCACCATCACTTGCCGGGCGAGTCAAGGCATTAACAAGGAGTTAAGCTGGTATCAGCAGAAACCAGGGAAAGCCCCTACACTCCTGATCTATGCTGCCTCCAGTTTGCAGACGGGGGTCTCATCTCGGTTCAGTGGCAGTGGATCTGGGACAGATTTCACTCTCACCATCAGCAGCCTGCAGCCTGAAGATGTTGCAACTTATTACTGTCAACAGGATTATAATACCCCGTC	DIQMTQSPSSLSASVGDTVTITCRASQGINKELSWYQQKPGKAPTLLIYAASSLQTGVSSRFSGSGSGTDFTLTISSLQPEDVATYYCQQDYNTP
IGKV1-NL_12*01_S0682_kim	GACATTCAGATGACCCAGTCTCCATCCTCCCTGTCTGCTTCTGTAGGAGACAGAGTCACCATCACTTGCCGGGCAAGTCAGGGCATTAGCAGTTATTTAAATTGGTATCAGCAGAAACCAGGGAAAGCCCCTAAGCTCCTGATCTATTATGCAAACCGTTTGGAAAGTGGGGTCCCATCAAGGTTCAGCGGCAGTGGATCTGGGACAGAATTCACTCTCACCGTCAGCAGCCTGCAACCTGAGGATTTTGCAACTTATTACTGTCAACAGTATAATAGTTTACCTCC	DIQMTQSPSSLSASVGDRVTITCRASQGISSYLNWYQQKPGKAPKLLIYYANRLESGVPSRFSGSGSGTEFTLTVSSLQPEDFATYYCQQYNSLP
IGKV1-NL_12*01_kim	GACATTCAGATGACCCAGTCTCCATCCTCCCTGTCTGCTTCTGTAGGAGACAGAGTCACCATCACTTGCCGGGCAAGTCAGGGCATTAGCAGTTATTTAAATTGGTATCAGCAGAAACCGGGGAAAGCCCCTAAGCTCCTGATCTATTATGCAAACCGTTTGGAAAGTGGGGTCCCATCAAGGTTCAGCGGCAGTGGATCTGGGACAGAATTCACTCTCACCATCAGCAGCCTGCAACCTGAGGATTTTGCAACTTATTACTGTCAACAGTATAATAGTTTACCTCC	DIQMTQSPSSLSASVGDRVTITCRASQGISSYLNWYQQKPGKAPKLLIYYANRLESGVPSRFSGSGSGTEFTLTISSLQPEDFATYYCQQYNSLP
IGKV1-NL_14*03_S4994	GACATCCAGATGACCCAGTCTCCATCTTCCCTGTCTGCATCTGTAGGAGACAGAGTCACCATCACTTGCAGGGCAAGTCAGGGCATTAGCAATTATTTAAGTTGGTATCAGCAGAAACCAGGAAAAGCTCCTAAGCTCCTGATCTATGCTGCATCCAGTTTGCAAAGTGGGGTCCCATCAAGGTTCAGCGGCAGTGGATCTGGGACAGATTTCACTCTCACCATCAGCAGCCTGCAGCCTGAAGATTTTGCAGCTTATTACTGTCAACAGCATAATAGTAACCCTCC	DIQMTQSPSSLSASVGDRVTITCRASQGISNYLSWYQQKPGKAPKLLIYAASSLQSGVPSRFSGSGSGTDFTLTISSLQPEDFAAYYCQQHNSNP
IGKV1-NL_15*01_S8599_kim	GATATCCAGATGACCCAGTCTCCATCTGCCTTGTCTGCATCTGTAGGAGACAGAGTCACCATCTCTTGCCGGGCAAGTCAGAACATTTATAGTAATTTAGCTTGGTATCAGCAGAAACCAGGGAAAGCCCCTAAGCTCCTGATCTATGCTGCATCCAGATTGCAAAGTGGGATTCCCTCTCGGTTCAGCGGCAGTGGATCTGGGACAGATTTCACTCTCACCATCAGCAGCCTGCAGCCTGAAGATTCTGCAGCTTATTACTGTCAACAGGTTTATAGTAACCCTCC	DIQMTQSPSALSASVGDRVTISCRASQNIYSNLAWYQQKPGKAPKLLIYAASRLQSGIPSRFSGSGSGTDFTLTISSLQPEDSAAYYCQQVYSNP
IGKV1-NL_17*01_S2173_kim	GACATCCAGATGACTCAGTCTCCATCCTCCCTGTCTGCATCTGTAGGAGACACAGTCACCATCACTTGCAGGGCGAGTCAGGGCATTAGCAATAATTTAGCCTGGTATCAGCAGAAACCGGGGAAAGTCCCTAAGCTCCTGATCTATTATGCATCCACTTTGCAAAGTGGGGTCCCATCAAGGTTCAGCGGCAGTGGATCTGGGACAGATTTCACTCTCACCATCAGCAGCCTGCAGCCTGAAGATTTTGCAACTTATTACTGTCAGCATGGTTATGGTACCCCTCC	DIQMTQSPSSLSASVGDTVTITCRASQGISNNLAWYQQKPGKVPKLLIYYASTLQSGVPSRFSGSGSGTDFTLTISSLQPEDFATYYCQHGYGTP
IGKV1-NL_19*01_S1380	GACATCCAGATGACCCAGTCTCCATCCTCCCTGTCTGCATCTGTAGGAGACAGAGTCACCATCACTTGTCGGGCAAGTCAGGGCATTAGCAATAATTTAGCCTGGTATCAGCAGAAACCAGGGAAAGCCCCTAAGCCCCTGATCTATAAGGCATCCAGTTTGGAAAGTGGGGTCCCATCAAGGTTCAGCGGCAGTGGATCTGGGACAGATTTCACTCTCACCATCAGCAGCCTGCAGCCTGAAGATTTTGCAGTTTATTACTGTCAACAGTATAATAGTAACCCTCC	DIQMTQSPSSLSASVGDRVTITCRASQGISNNLAWYQQKPGKAPKPLIYKASSLESGVPSRFSGSGSGTDFTLTISSLQPEDFAVYYCQQYNSNP
IGKV1-NL_2*01_S7019	GACATCCAGATGACCCAGTCTCCATCCTCCCTGTCTGCATCTGTAGGAGACAAAGTCACCATCACTTGCCGGGCGAGTCAGAGTATTAGCAGCTGGTTAGACTGGTATCAGCAGAAACCAGGGAAAGCCCCTAAGCTCCTGATCTATAAGGCATCCAGTTTGCAAAGTGGGGTCCCATCAAGGTTCAGCGGCAGTGGATCTGGGACGGATTACACTCTCACCATCAGCAGCCTGCAGCCTGAAGATTTTGCAACTTATTATTGTCAACAGGGTTACAATACCCCTC	DIQMTQSPSSLSASVGDKVTITCRASQSISSWLDWYQQKPGKAPKLLIYKASSLQSGVPSRFSGSGSGTDYTLTISSLQPEDFATYYCQQGYNTP
IGKV1-NL_4*01_S4157_kim	GACATCCAGATGACCCAGTCTCCATCCTCCCTGTCTGCATCTGTAGGAGACACAGTCACCATCACTTGCCGGGCGAGTCAGAGTATTAGCAGCTGGTTAGCCTGGTATCAGCAGAAACCAGGGAAAGCCCCTAAGCTCCTGATCTATAAGGCGTCCAGTTTGCAAAGTGGGGTCCCATCAAGGTTCAGCGGCAGTGGATCTGGGACAGATTTCACTCTCACCATCAGCAGCCTGCAGTCTGAAGATTTTGCAACTTATTACTGTCAACAGTATAGCAGTAGCCCTCC	DIQMTQSPSSLSASVGDTVTITCRASQSISSWLAWYQQKPGKAPKLLIYKASSLQSGVPSRFSGSGSGTDFTLTISSLQSEDFATYYCQQYSSSP
IGKV1-NL_4*01_S8027_kim	GACATCCAGATGACCCAGTCTCCATCCTCCCTGTCTGCATCTGTAGGAGACACAGTCACCATCACTTGCCGGGCGAGTCAGAGTATTAGCAGCTGGTTAGCCTGGTATCAGCAGAAACCAGGGAAAGCCCCTAAGCTCCTGATCTATAAGGCATCCAGTTTGCAAAGTGGGGTCCCATCAAGGTTCAGCGGCAGTGGATCTGGGACAGATTTCACTCTCACCATCAGCAGCCTGCAGTCTGAAGATTTTGCAACTTATTACTGTCAACAGTATAGCAGTAGCCCTCC	DIQMTQSPSSLSASVGDTVTITCRASQSISSWLAWYQQKPGKAPKLLIYKASSLQSGVPSRFSGSGSGTDFTLTISSLQSEDFATYYCQQYSSSP
IGKV1S14*01_S3242	GACATCCAGATGACCCAGTCTCCATCTTCCCTGTCTGCATCTGTAGGAGACAGAGTCACCATCACTTGCCAAGCCAGTCAGGGCATTAGCAGTTATTTAGCGTGGTATCAGCAGAAACCAGGGAAAGCCCCGAAGCCCCTGATCTATTACGCATCCAATTTGGAAAGTGGGGTCCCATCAAGGTTCAGCGGCAGTGGATCTGGGACAGATTTCACTCTCACCATCAGCAGCCTGCAGCCTGAAGATTTTGCAACTTATTACTGTCAACAGCATAATAGTTACCCTCC	DIQMTQSPSSLSASVGDRVTITCQASQGISSYLAWYQQKPGKAPKPLIYYASNLESGVPSRFSGSGSGTDFTLTISSLQPEDFATYYCQQHNSYP
IGKV1S14*01_S7871_kim	GACATCCAGATGACCCAGTCTCCATCCTCCCTGTCTGCATCTGTAGGAGACACAGTCACCATCACTTGTCGGGCAAGTCAGGGCATTAGCAATTATTTAGCCTGGTATCAGCAGAAACCAGGGAAAGCCCCGAAGCCCCTGATCTATTACGCATCCAATTTGGAAAGTGGGGTCCCATCAAGGTTCAGCGGCAGTGGATCTGGGACAGATTTCACTCTCACCATCAGCAGCCTGCAGCCTGAAGATTTTGCAATTTATTACTGTCAACAGCATAATAGTTACCCTCC	DIQMTQSPSSLSASVGDTVTITCRASQGISNYLAWYQQKPGKAPKPLIYYASNLESGVPSRFSGSGSGTDFTLTISSLQPEDFAIYYCQQHNSYP
IGKV1S14*01_kim	GACATCCAGATGACCCAGTCTCCATCCTCCCTGTCTGCATCTGTAGGAGACACAGTCACCATCACTTGTCGGGCAAGTCAGGGCATTAGCAATTATTTAGCCTGGTATCAGCAGAAACCAGGGAAAGCCCCAAAGCCCCTGATCTATTACGCATCCAATTTGGAAAGTGGGGTCCCATCAAGGTTCAGCGGCAGTGGATCTGGGACAGATTTCACTCTCACCATCAGCAGCCTGCAGCCTGAAGATTTTGCAACTTATTACTGTCAACAGCATAATAGTTACCCTCC	DIQMTQSPSSLSASVGDTVTITCRASQGISNYLAWYQQKPGKAPKPLIYYASNLESGVPSRFSGSGSGTDFTLTISSLQPEDFATYYCQQHNSYP
IGKV1S21*01_S8331	GACATCCAGATGACCCAGTCTCCATCCTCCCTGTCTGCATCTGTAGGAGACAGAGTCACCATAACTTGCAGGGCAAGTCAGGGCATTAGCAATTATTTAAATTGGTATCAGCAGAAACCAGGAAAAGCTCCTAAGCGCCTGATCTATGATGCATCCAGTTTGCAAAGTGGGGTCCCATCAAGGTTCAGCGGCAGTGGATCTGGGACAGATTTCACTCTCACCATCAGCAGCCTGCAGCCTGAAGATTTTGCAGCTTATTACTGTCTACAGTATAACAGTGCGCCTCC	DIQMTQSPSSLSASVGDRVTITCRASQGISNYLNWYQQKPGKAPKRLIYDASSLQSGVPSRFSGSGSGTDFTLTISSLQPEDFAAYYCLQYNSAP
IGKV1S5*01_S5499	GACATCCAGATGACCCAGTCTCCATCTTCCTTATCTGCATCTGTAGGAGACAGAGTCACCATCACTTGTCGGGCTAGTCAGACCATTAGCAGTTATTTAGCCTGGTATCAGCAGAAACCAGGGAAAGCCCCTAAGCTCCTGATCTATGCTGCATCCAGTTTGGAAAGTGGGGTCCCATCAAGGTTCAGCAGCAGTGGATCTGGGACAGAATTCACTCTCACCATCAGCAGCCTGCAGCCTGAAGATTTTGCAACTTATTACTGTCAACAGCATAATAGTCACCCTCC	DIQMTQSPSSLSASVGDRVTITCRASQTISSYLAWYQQKPGKAPKLLIYAASSLESGVPSRFSSSGSGTEFTLTISSLQPEDFATYYCQQHNSHP
IGKV1S6*01_S2889_kim	GACATCCAGATGACCCAGTCTCCATCTTCCTTGTCTGCATCTGTAGGAGACAGAGTCACCATCACTTGCCAAGCCAGTCAGGGTATTAGCAACTGGTTAGCCTGGTATCAGCAGAAACCAGGGAAAGCCCCTAAGCGCCTGATCTATGCTGCATCCAGTTTGGAAAGTGGGGTCCCATCAAGGTTCAGCGGCAGTGGATCTGGGACAGAATTCACTCTCACCATCAGCAGCCTGCAGCCTGAAGATTTTGCAACTTATTACTGTCAGCAGCATAATAGTTACCCTCC	DIQMTQSPSSLSASVGDRVTITCQASQGISNWLAWYQQKPGKAPKRLIYAASSLESGVPSRFSGSGSGTEFTLTISSLQPEDFATYYCQQHNSYP
IGKV1S6*01_S3698_kim	GACATCCAGATGACCCAGTCTCCATCTTCCTTGTCTGCATCTGTAGGAGACAGAGTCACCATCACTTGCCAAGCCAGTCAGGGTATTAGCAACTGGTTAGCCTGGTATCAGCAGAAACCAGGGAAAGCCCCTAAGCGCCTGATCTATGCTGCATCCAGTTTGGAAAGCGGGGTCCCATCAAGGTTCAGCGGCAGTGGATCTGGGACAGAATTCACTCTCACCATCAGCAGCCTGCAGCCTGAAGATTTTGCAACTTATTACTGTCAGCAGCATAATAGTTACCCTCC	DIQMTQSPSSLSASVGDRVTITCQASQGISNWLAWYQQKPGKAPKRLIYAASSLESGVPSRFSGSGSGTEFTLTISSLQPEDFATYYCQQHNSYP
IGKV1S6*01_S8874	GACATCCAGATGACCCAGTCTCCATCTTCCTTGTCTGCATCTGTAGGAGACAGAGTCACCATCACTTGCCAAGCCAGTCAGGGTATTAGCAACTGGTTAGCCTGGTATCAGCAGAAACCAGGGAAAGCCCCTAAGCGCCTGATCTATGCTGCATCCAGTTTGGAAAGTGGGGTCCCATCAAGGTTCAGCGGCAGTGGATCTGGGACAGATTTCACTCTCACCATCAGCAGCCTGCAGCCTGAAGATTTTGCAACTTATTACTGTCAGCAGCATAATAGTTACCCTCC	DIQMTQSPSSLSASVGDRVTITCQASQGISNWLAWYQQKPGKAPKRLIYAASSLESGVPSRFSGSGSGTDFTLTISSLQPEDFATYYCQQHNSYP
IGKV1S6*02_S9621	GACATCCAGATGACCCAGTCTCCATCTTCCTTGTCTGCATCTGTAGGAGACAGAGTCACCATCACTTGCCAAGCCAGTCAGGGTATTAGCAACTGGTTAGCCTGGTATCAGCAGAAACCAGGGAAAGCCCCTAAGCTCCTGATCTATGCTGCATCCAGTTTGCAAAGTGGGGTCCCATCAAGGTTCAGCGGCAGTGGATCTGGGACGGAATTCACTCTCACCATCAGCAGCCTGCAGCCTGAAGATTTTGCAACTTATTACTGTCAACAGCATAATAGTAACCCTCC	DIQMTQSPSSLSASVGDRVTITCQASQGISNWLAWYQQKPGKAPKLLIYAASSLQSGVPSRFSGSGSGTEFTLTISSLQPEDFATYYCQQHNSNP
IGKV2-60*01_S2760	GATATCGTGATGACCCAGACTCCACTCTCCCTGCCCGTCACCCTTGGAGAGTCGGCCTCCATCTCCTGCAGGTCTAGTCAGAGCCTTCTGAGTAGTAATGGATACAACTATTTGAATTGGTACCTGCAGAAGCCAGGCCAGTCTCCACAGCTCCTGATCTATTATGGTTCTAATCGGGCCTCCGGGGTCCCCGACAGGTTCAGTGGCAGTGGGTCAGGCACAGATTTTACACTGAAAATCAGCAGGGTGGAGGCTGAGGACGTAGGGGTTTATTACTGCATGCAAGCTCTACAAACTCCTCC	DIVMTQTPLSLPVTLGESASISCRSSQSLLSSNGYNYLNWYLQKPGQSPQLLIYYGSNRASGVPDRFSGSGSGTDFTLKISRVEAEDVGVYYCMQALQTP
IGKV2-60*01_S5010	GATATCGTGATGACCCAGACTCCACTCTCTCTGCCCGTCACCCTTGGAGAGCCGGCCTCCATCTCCTGCAGGTCTAGTCAGAGCCTTCTGAGTAGTAATGGATACAACTATTTGAATTGGTACCTGCAGAAGCCAGGCCAGTCTCCACAGCTCCTGATCTATTATGGTTCTAATCGGGCCTCCGGGGTCCCCGACAGGTTCAGTGGCAGTGGGTCAGGCACAGATTTTACGCTGAAAATCAGCAGGGTGGAGGCTGAGGACGTAGGGGTTTATTACTGCATGCAAACTCTACAAACTCC	DIVMTQTPLSLPVTLGEPASISCRSSQSLLSSNGYNYLNWYLQKPGQSPQLLIYYGSNRASGVPDRFSGSGSGTDFTLKISRVEAEDVGVYYCMQTLQT
IGKV2-61*01_kim_S4545	GATATTGTGATGACCCAGACTCCACTCTCCCTGCCAGTCACCCCTGGAGAGCCAGCCTCCATCTCCTGCAGGTCTAGTCAGAGCCTCCTGCATACTGATGGATATACCTATTTGGATTGGTACCTGCAGAAGCCAGGCCAGTCTCCGCAGCTCCTGATTTATGGGGGTTCCAACAGAGCCTCTGGAGTCCCAGACAGGTTCAGTGGCAGTGGGTCAGGCACTGATTTCACACTGAAAATCAGCAAGGTGGAGGCGGAGGATGTTGGGGTTTATTACTGCATGCAACATAAAGCGCTTCCTCC	DIVMTQTPLSLPVTPGEPASISCRSSQSLLHTDGYTYLDWYLQKPGQSPQLLIYGGSNRASGVPDRFSGSGSGTDFTLKISKVEAEDVGVYYCMQHKALP
IGKV2-62*02_S9986_kim	GATGTTGTGATGACTCAGTCTCCACTCTCCCTGCCCATCACCCCTGGACAGCCGGCCTCCATCTCCTGCAGGTCTAGTCAGAGCCTTGTACACAGTGATGGAAACACCTACTTGAGTTGGTATCAGCAGAAGCCAGGCCAACCTCCAAGGCTCCTGATTTATAAGGTTTCTAACCGGTACTCTGGGGTCCCAGACAGATTCAGCGGCAGTGGGGCAGGGACAGATTTCACACTGAAAATCAGCAGAGTGGAGGCTGAGGATGTTGGGGTTTATTACTGCGGGCAAGGTACAAAGGTTCCTCC	DVVMTQSPLSLPITPGQPASISCRSSQSLVHSDGNTYLSWYQQKPGQPPRLLIYKVSNRYSGVPDRFSGSGAGTDFTLKISRVEAEDVGVYYCGQGTKVP
IGKV2-72*01_kim	GATATTGTGATGACCCAGACTCCACTCTCCCTGCCCATCACCCCTGGAGAGCCGGCCTCCATCTCCTGCAGGTCTAGTCAGAGCCTCCTGCATAGTAATGGAAACACCTATTTGCACTGGTACCTGCAGAAGCCAGGCCAGTCTCCGCAGCTCCTGATTTATGGGGGTTCCAACAGAGCCTCTGGAGTCCCAGACAGGTTCAGTGGCAGTGGGTCAGGCACTGATTTCACACTGAAAATCAGCAAGGTGGAGGCGGAGGATGTTGGGGTTTATTACTGCGTGCAAGCTATAGCGTTTCCTCC	DIVMTQTPLSLPITPGEPASISCRSSQSLLHSNGNTYLHWYLQKPGQSPQLLIYGGSNRASGVPDRFSGSGSGTDFTLKISKVEAEDVGVYYCVQAIAFP
IGKV2-78*01_S6321_kim	GATATAGTGATGACCCAGACTCCACTCTCCCTGCCCGTCACCCCTGGAGAGCCGGCCTCCATCTCCTGCAGGTCTAGTCAGAGCCTCCTGGATAGTTATGGATACACTCATTTGCATTGGTACCTGCAGAAGCCAGGCCAGTCTCCACAGCTCCTGATCTATTTGGTTTCCAACCGGGCCTCTGGAGTCCCAGACAGGTTCAGTGGCAGTGGGTCAGGCACTGATTTCACACTGAAAATCAGCAGGGTGGAGGCTGAGGATGTTGGGGTTTATTACTGCATGCAAACTCTACAAACTCCTCC	DIVMTQTPLSLPVTPGEPASISCRSSQSLLDSYGYTHLHWYLQKPGQSPQLLIYLVSNRASGVPDRFSGSGSGTDFTLKISRVEAEDVGVYYCMQTLQTP
IGKV2-78*01_S7588_kim	GATATAGTGATGACCCAGACTCCACTCTCCCTGCCCGTCACCCCTGGAGAGCCGGCCTCCATCTCCTGCAGGTCTAGTCAGAGCCTCCTGGATAGTTATGGATACACTCATTTGCACTGGTACCTGCAGAAGCCAGGCCAGTCTCCACAGCTCCTGATCTATTTGGGTTCCAACCGGGCCTCTGGAGTCCCAGACAGGTTCAGTGGCAGTGGGTCAGGCACTGATTTCACACTGAAAATCAGCAGGGTGGAGGCTGAGGATGTTGGGGTTTATTACTGCATGCAAACTCTACAAACTCCTCC	DIVMTQTPLSLPVTPGEPASISCRSSQSLLDSYGYTHLHWYLQKPGQSPQLLIYLGSNRASGVPDRFSGSGSGTDFTLKISRVEAEDVGVYYCMQTLQTP
IGKV2-82*02_kim	GATATTGTGATGATCCAGACTCCACTCTCCCTGCCCGTCACCCTTGGAGAGCCGGCCTCCATCTCCTGCAGGTCCAGTCAGAGCCTTGTATACAGTGATGGAAAAACCTATTTGTATTGGTACCTGCAGAAGCCAGGCCAGTCTCCACAGCTCCTGATGTATTTGGTTTCCAAACGGGCCTCTGGAGTCCCAGACAAGTTCAGTGGCAGTGGGTCAGGCACTGATTTCACACTGAAAATCAGCAGGGTGGAGGCTGAGGATGTTGGGGTTTATTACTGCATGCAAGCTCTACGGTCTCCTTC	DIVMIQTPLSLPVTLGEPASISCRSSQSLVYSDGKTYLYWYLQKPGQSPQLLMYLVSKRASGVPDKFSGSGSGTDFTLKISRVEAEDVGVYYCMQALRSP
IGKV2-90*01_S7749_kim	GATATTGTGATGACCCAGACTCCACTCTCCCTGCCCGTCACCCCTGGAGAGCCGGCCTCCATCTCCTGCAGGTCTAGTCAGAGCCTCTTGGATAGTGACGGGTACACCTGTTTGGACTGGTACCTGCAGAAGCCAGGCCAGTCTCCACAGCTCCTGATCTATGAGGTTTCCAACCGGGTCTCTGGAGTCCCTGACAGGTTCAGTGGCAGTGGGTCAGGCACTGATTTCACACTGAAAATCAGCCGGGTGGAAGCTGAGGATGTTGGGGTGTATTACTGTATGCAAAGTATAGAGTTTCCTCC	DIVMTQTPLSLPVTPGEPASISCRSSQSLLDSDGYTCLDWYLQKPGQSPQLLIYEVSNRVSGVPDRFSGSGSGTDFTLKISRVEAEDVGVYYCMQSIEFP
IGKV2-99*01_S9949_kim	GATATCGTGATGACCCAGACTCCACTCTCCCTGCCCGTCACCCCTGGAGAGCCGGCCTCCATCTCCTGCAGGTCTAGTCAGAGCCTCTTCGATAGTGATTATGCAAACACCTATTTGGATTGGTATCTGCAGAAGCCAGGCCAGTCTCCACAGCTCCTGATCTATATGCTTTCCAACCGGGCCTCTGGAGTCCCTGATAGGTTCAGTGGCAGTGGGTCAGGCACTGATTTCACACTGAAAATCAGCCGGGTGGAGGCTGAGGATGTTGGGGTATATTACTGCATGCAAAGTGTAGAATATCCTCC	DIVMTQTPLSLPVTPGEPASISCRSSQSLFDSDYANTYLDWYLQKPGQSPQLLIYMLSNRASGVPDRFSGSGSGTDFTLKISRVEAEDVGVYYCMQSVEYP
IGKV2-NL_12*01_S9660_kim	GATGTTGTGATGACTCAGTCTCCACTCTCCCTGCCCATCACCCCTGGACAGCCGGCCTCCATCTCCTGCAGGTCTAGTCAAAGCCTTGTACACAGTAATGGAAACACCTACTTGAGTTGGTATCAGCAGAAGCCAGGCCAACCTCCAAGGCTCCTGATTTATAAGGTTTCTAACCGGGACTCTGGGGTCCCAGACAGATTCAGCGGCAGTGGGGCAGGGACAGATTTCACACTGAAAATCAGCAGAGTGGAGGCTGAGGATGTTGGGGTTTATTACTGCGGGCAAGGTACACACCTTCCTCC	DVVMTQSPLSLPITPGQPASISCRSSQSLVHSNGNTYLSWYQQKPGQPPRLLIYKVSNRDSGVPDRFSGSGAGTDFTLKISRVEAEDVGVYYCGQGTHLP
IGKV2-NL_13*01_S4447_kim	GATGTTGTGATGACTCAGTCTCCACTCTCCCTGCCCATCACCCCTGGACAGCCGGCCTCCATCTCCTGCAGGTCTAGTCAAAGCCTTGTACACAGTAATGGAAACACCTACTTGAGTTGGTATCAGCAGAAGCCAGGCCAACCTCCAAGGCTCCTGATTTATCAGGTTTCTAACCGGTACTCTGGGGTCCCAGACAGATTCAGCGGCAGTGGGGCAGGGACAGATTTCACACTGAAAATCAGCAGAGTGGAGGCTGAGGATGTTGGGGTTTATTACTGCGGGCAAGGTGCACACCTTCCTCC	DVVMTQSPLSLPITPGQPASISCRSSQSLVHSNGNTYLSWYQQKPGQPPRLLIYQVSNRYSGVPDRFSGSGAGTDFTLKISRVEAEDVGVYYCGQGAHLP
IGKV2-NL_3*01_S1264_kim	GATGTTGTGATGACTCAGTCTCCACTCTCCCTGCCCGTCACCCCTGGACAGCCGGCCTCGATCTCCTGCAGGTCTAGTCAGAGCCTCCTGCATAGTAATGGAAACACTTACTTGAGTTGGTTTCTGCAGAAGCCAGGCCAACCTCCAAGGCGCCTAATTTATAAGGTTTCTAACCGGGACTCTGGGGTCCCAGACAGATTCAGCGGCAGTGGGGCAGGGACAGATTTCACACTGAAAATCAGCAGAGTGGAGGCTGAGGATGTCGGGGTTTATTACTGCATGCAAGGTACACACTGGCCTCC	DVVMTQSPLSLPVTPGQPASISCRSSQSLLHSNGNTYLSWFLQKPGQPPRRLIYKVSNRDSGVPDRFSGSGAGTDFTLKISRVEAEDVGVYYCMQGTHWP
IGKV2-NL_6*01_S2512_kim	GATATTGTGATGACCCAGACTCCACTCTCCCTATCCGTCACCCCTGGAGAGCCGGCTTCCATCTCCTGCAGGTCTAGTCAGAGCCTCCTGCATAGTAATGGGTACACCTATTTGCATTGGTACTTGCAGAAGCCAGGCCAGTCTCCACAGCTCCTGATCTATTTGGTTTCCAACCGGGCCTCTGGAGTCCCTGACAGGTTCAGTGGCAGTGGGTCAGGCACTGATTTCACACTGAAAATCAGCCGGGTGGAGGCTGAGGATGTTGGGGTTTATTACTGCGAGCAAACTCTACAAACTCCTCC	DIVMTQTPLSLSVTPGEPASISCRSSQSLLHSNGYTYLHWYLQKPGQSPQLLIYLVSNRASGVPDRFSGSGSGTDFTLKISRVEAEDVGVYYCEQTLQTP
IGKV2-NL_7*01_S7454_kim	GATATTGTGATGACTCAGACTCCACTCTCCCTGCCCGTCACCCCTGGAGAGCCGGCCTCCATCTCCTGCAGGTCTAGTCAGAGCCTCCTGCATAGTAATGGATACACCTATTTGTTTTGGTACCTGCAGAAGCCAGGCCAGTCTCCACAGCTCCTGATCTATTTGGGTTCCAACCGGGCCTCTGGAGTCCCAGACAGGTTCAGTGGCAGTGGGTCAGGCACTGATTTCACACTGAAAATCAGCCGGGTGGAGGCTGAGGATGTTGGGGTTTATTACTGCTTGCAAGATATACAGCTTCCTCC	DIVMTQTPLSLPVTPGEPASISCRSSQSLLHSNGYTYLFWYLQKPGQSPQLLIYLGSNRASGVPDRFSGSGSGTDFTLKISRVEAEDVGVYYCLQDIQLP
IGKV2-NL_8*01_S9623_kim	GATATTGTGATGACCCAGACTCCACTCTCCCTGCCCGTCACCCCTGGAGAGCCGGCCTCCATCTCCTGCAGGTCTAGTCAGAGCCTCCTGCATAGTGATGGATACACCTATTTGGACTGGTACCTGCAGAAGCCAGGCCAGTCTCCACAGCTCTTGATCTATTTGGGTTCCAACCGGGCCTCTGGAGTCCCTGACAGGTTCAGTGGCAGTGGGTCAGGCACTGATTTCACACTGAAAATCAGCCGGGTGGAGGCTGAGGATGTTGGGGTTTATTACTGCATGCAAGGTACACAGCTTCCTCC	DIVMTQTPLSLPVTPGEPASISCRSSQSLLHSDGYTYLDWYLQKPGQSPQLLIYLGSNRASGVPDRFSGSGSGTDFTLKISRVEAEDVGVYYCMQGTQLP
IGKV2S2*01_kim	GATATTGTGATGACCCAGACTCCACTCTCGCTGCCCGTCACCCCTGGAGAGCCGGCCTCCATCTCCTGCAGGTCTAGTCAGAGCCTTCTGCATAGTAATGGAAACACCTATTTGGATTGGTACCTGCAGAAGCCAGGCCAGTCTCCACGGCTCCTGATCTATAAAGTTACCAATCGGGAATCTGGGGTCCCAGACAGGTTCAGTGGCAGTGGGTCAGGCACAGATTTCACACTGAAAATCAGCAGGGTGGAGCCTGAGGATGTTGGTGTTTATTACTGCATGCAAAGTACAAAAGATCCCC	DIVMTQTPLSLPVTPGEPASISCRSSQSLLHSNGNTYLDWYLQKPGQSPRLLIYKVTNRESGVPDRFSGSGSGTDFTLKISRVEPEDVGVYYCMQSTKDP
IGKV2S20*01_kim	GATATTGTGATGACCCAGACTCCACTCTCCCTGCCAGTCACCCCTGGAGAGCCGGCCTCCATCTCCTGCAGGTCTAGTCAGAGCCTCTTGGATAGTGAGGATGGAAACACCTATTTGGAATGGTACCTGCAGAAGCCAGGCCAGTCTCCACAGCCCTTGATTTATGAGGTTTCCAACCGGGCCTCTGGAGTCCCAGACAGGTTCAGTGGCAGTGGGTCAGACACTGATTTCACACTGAAAATCAGCAGAGTGGAGGCTGAGGATGTTGGGGTTTATTACTGCATGCAAGGTATAGAGTATCCTCC	DIVMTQTPLSLPVTPGEPASISCRSSQSLLDSEDGNTYLEWYLQKPGQSPQPLIYEVSNRASGVPDRFSGSGSDTDFTLKISRVEAEDVGVYYCMQGIEYP
IGKV2S20*02_S4206A	GACATTGTGATGACCCAGACTCCACTCTCCCTGCCTGTCACCCTTGGAGAGCCGGCCTCCATCTCCTGCAGGTCTAGTCAGAGCCTCTTGGATAGTGAGGATGGAAACACCTATTTGGAATGGTACCTGCAGAAGCCAGGCCAGTCTCCACAGCTCTTGATTTATGAGGTTTCCAACCGGGCCTCTGGAGTCCCAGACAGGTTCAGTGGCAGTGGGTCAGACACTGATTTCACACTGAAAATCAGCAGAGTGGAGGCTGAGGATGTTGGGGTTTATTACTGCATGCAAGCTCTAGAGTTTCCTCC	DIVMTQTPLSLPVTLGEPASISCRSSQSLLDSEDGNTYLEWYLQKPGQSPQLLIYEVSNRASGVPDRFSGSGSDTDFTLKISRVEAEDVGVYYCMQALEFP
IGKV2S20*02_S8364_kim	GATATTGTGATGACCCAGACTCCACTCTCCCTGCCCGTCACCCCTGGAGAGCCGGCCTCCATCTCCTGCAGGTCTAGTCAGAGCCTCTTGGATAGTGAGGATGGAAACACCTATTTGGATTGGTACCTGCAGAAGCCAGGCCAGTCTCCACAGCTCTTGATTTATGAGGTTTCCAACCGGGCCTCTGGAGTCCCAGACAGGTTCAGTGGCAGTGGGTCAGACACTGATTTCACACTGAAAATCAGCAGAGTGGAGGCTGAGGATGTTGGGGTTTATTACTGCATGCAAGCTCTAGAGTTTCCTCC	DIVMTQTPLSLPVTPGEPASISCRSSQSLLDSEDGNTYLDWYLQKPGQSPQLLIYEVSNRASGVPDRFSGSGSDTDFTLKISRVEAEDVGVYYCMQALEFP
IGKV2S9*01_S9431	TTGTGATGACTCAGTCTCCACTCTCCCTGCCTGTCACTCTTGGACAGCCAGCCTCCATCTCCTGCAGGTCTAGTCAAAGCCTTGTACACAGTGATGGGAAAACCTACTTGAATTGGTTACAGCAGAAGCCAGGCCAACCTCCAAGGCGCCTAATTTATCAGGTTTCTAACCGGGACTCTGGGGTCCCAGACAGATTCAGCGGCAGTGGGGCAGGGACAGATTTCACACTGAAAATCAGCAGAGTGGAGGCTGAGGATGTTGGAGTTTATTACTGCATGCAAGGTACACACTGGCCTCC	L**LSLHSPCLSLLDSQPPSPAGLVKALYTVMGKPT*IGYSRSQANLQGA*FIRFLTGTLGSQTDSAAVGQGQISH*KSAEWRLRMLEFITACKVHTGL
IGKV3-12*01_S6375_kim	GAAATTGTGCTGACCCAGTCTCCAACATCCATGGCTGTCTCCCAAGGAGAAAGAGTCACCATCTCCTGCACGGCCAGCTCAAGTGTAAGCACCAGCTACTTGCACTGGTACCAACAGAAGCCAGGATTCCCTCCAAGGCTTCTTGTCTATAGAACATCAAGTCTGGCTTCTGGAGTCCCAGCCAGGTTCAGTGGCAGCGGTTCTGGGACCTCTTACACGCTCACAATCAGCAGCATGGAGGCTGAAGATGCTGCAAACTATTACTGTCAGCAGGGGAATAGCATTCCACC	EIVLTQSPTSMAVSQGERVTISCTASSSVSTSYLHWYQQKPGFPPRLLVYRTSSLASGVPARFSGSGSGTSYTLTISSMEAEDAANYYCQQGNSIP
IGKV3-17*01_S0783	GAAATAGTGATGACGCAGTCTCCAGCCACCCTGTCTTTGTCTCCAGGGGAAAGAGCCACCCTCTCCTGCAGGGCCAGTCAGAGTGTCAGCAGCAGCTTAGCCTGGTACCAGCAGAAACCTGGGCAAGCTCCCAGGCTCCTCATCTATGATGCATCCAGCAGGGTCACTGGTATCCCAGATAGGTTCAGTGGCAGCGGGTCTGGGACAGACTTCACTCTCACCATCAGCAGCCTGGAGCCTGAAGATGTTGCAGTTTATTTCTGTCAGCAGGAGAGTAACTGGTCTCA	EIVMTQSPATLSLSPGERATLSCRASQSVSSSLAWYQQKPGQAPRLLIYDASSRVTGIPDRFSGSGSGTDFTLTISSLEPEDVAVYFCQQESNWS
IGKV3-17*02_S0736	GAAATAGTGATGACGCAGTCTCCAGCCACCCTGTCTTTGTCTCCAGGGGAAAGAGCCACCCTCTCCTGCAGGGCCAGTCAGAGTGTCAGCAGCAGGTTAGCCTGGTACCAGCAGAAACCTGGGCAAGCTCCCAGGCTCCTCATCTATGATGCATCCAACAGGGCCACTGGTATCCCAGACAGGTTCAGTGGCAGCGGGTCTGGGACAGACTTCACTCTCACCATCAGCAGCCTGGAGCCTGAAGATGTTGCAGTTTATTTCTGTCAGCAGGAGAGTAACTGGTCTCA	EIVMTQSPATLSLSPGERATLSCRASQSVSSRLAWYQQKPGQAPRLLIYDASNRATGIPDRFSGSGSGTDFTLTISSLEPEDVAVYFCQQESNWS
IGKV3-17*02_kim	GAAATAGTGATGACGCAGTCTCCAGCCACCCTGTCTTTGTCTCCAGGGGAAAGAGCCACCCTCTCCTGCAGGGCCAGTCAGAGTGTCAGCAGCAGGTTAGCCTGGTACCAGCAGAAACCTGGGCAAGCTCCCAGGCTCCTCATCTATGATGCATCCAGCAGGGTCACTGGTATCCCAGACAGGTTCAGTGGCAGCGGGTCTGGGACAGACTTCACTCTCACCATCAGCAGCCTGGAGCCTGAAGATGTTGCAGTTTATTTCTGTCAGCAGGAGAGTAACTGGTCTCA	EIVMTQSPATLSLSPGERATLSCRASQSVSSRLAWYQQKPGQAPRLLIYDASSRVTGIPDRFSGSGSGTDFTLTISSLEPEDVAVYFCQQESNWS
IGKV3-40*03_S4103_kim	GAAATTGTAATGACGCAGTCTCCAGCCACCCTGTCTTTGTCTCCAGGGGAAACAGCCACCCTCTCCTGCAGGGCCAGTGAGAGTGTTGGCAGCTACTTAGCCTGGTACCAGCAGAAACCTGGGCAGGTTCCCAAGCTCCTCGTCCATAGTGCATACTTCAGGGCCACTGGCATCCCAGACAGGTTCAGTGGCAGCGGGTCTAGGACAGAGTTCACTCTCACCATTAGCAGCCTGGAGCCTGAAGATGTTGGAGTTTATCACTGTCAGCAGTATAATGACTTGCTTCC	EIVMTQSPATLSLSPGETATLSCRASESVGSYLAWYQQKPGQVPKLLVHSAYFRATGIPDRFSGSGSRTEFTLTISSLEPEDVGVYHCQQYNDLL
IGKV3-42*03_S5589_kim	GAAATTGTGTTGACGCAGTCTCCAGCCACCCTGTCTTTGTCTCCAGGAGAAAGAGCCACCCTCTCCTGCAGGGCCAGTCAGAGTGTCAGCAGCAGCTTAGCCTGGTACCAGCAGAAACCTGGGCAGGCTCCCAGGCTCCTCATCTATGGTGCATCCAGCAGGGCCACTGGCATCCCAGACAGGTTCAGTGGCAGTGGGTCTGGGACAGACTTCACTCTCACCATCAGCAGCCTGGAGCCTGAAGATTTTGCAGTTTATTATTGTCAGCAGTATAGTAACTGGCCTCA	EIVLTQSPATLSLSPGERATLSCRASQSVSSSLAWYQQKPGQAPRLLIYGASSRATGIPDRFSGSGSGTDFTLTISSLEPEDFAVYYCQQYSNWP
IGKV3-53*01_S8114_kim	CAAGTTATATTGACTCAGTCTCCAGCCACCCTGTCTTTGTCTCCAGGGGAAAGAGCCACTCTCTCCTGCAGGGCCAGTCAGAGTGTTAGCAGCTACTTAGCCTGGTACCAGCAGAAACCTGGGCAGGCCCCCAGGCTCCTCATCTATGGTGCATCCAGCAGGGCCACTGGCATCCCAGACAGGTTCAGTGGCAGTGGGTCTGGGACAGAGTTCACTCTCACCATCAGCAGCCTGGAGCCTGAAGATTTTGCAGTGTATTACTGTCAGAAGTATAGTAGCTCCCCTCC	QVILTQSPATLSLSPGERATLSCRASQSVSSYLAWYQQKPGQAPRLLIYGASSRATGIPDRFSGSGSGTEFTLTISSLEPEDFAVYYCQKYSSSP
IGKV3-53*02_kim	CAAGTTATATTGACTCAGTCTCCAGCCACCCTGTCTTTGTCTCCAGGGGAAAGAGCCACCCTCTCCTGCAGGGCCAGTCAGAGTGTCAGCAGCAGCTTAGCCTGGTACCAGCAGAAACCTGGGCAGGCTCCCAGGCTCCTCATCTATGGTGCATCCAGCAGGGCCACTGGCATCCCAGACAGGTTCAGTGGCAGTGGGTCTGGGACAGAGTTCACTCTCACCATCAGCAGCCTGGAGCCTGAAGATTTTGCAGTGTATTACTGTCAGAAGTATAGTAGCTCCCCTCC	QVILTQSPATLSLSPGERATLSCRASQSVSSSLAWYQQKPGQAPRLLIYGASSRATGIPDRFSGSGSGTEFTLTISSLEPEDFAVYYCQKYSSSP
IGKV3-NL_1*01_S0082_kim	CAAGTTATATTGACACAGTCTCCAGCCACCCTGTCTTTGTCTCCAGGGGAAAGAGCCACTCTCTCCTGCAGGGCCAGTCAGAGTGTCAGCAGCTACTTAGCCTGGTACCAGCAGAAACCTGGGCAGGCTCCCAGGCTCCTCATCTATGGTGCATCCAGCAGGGCCACTGGTATCCCAGACAGGTTCAGTGGCAGCGGGTCTGGGACAGACTTCACTCTCACCATCAGCAGCCTGGAGCCTGAAGATGTTGGAGTTTATCACTGCTATCAGCATAGCAGCGGGTACCC	QVILTQSPATLSLSPGERATLSCRASQSVSSYLAWYQQKPGQAPRLLIYGASSRATGIPDRFSGSGSGTDFTLTISSLEPEDVGVYHCYQHSSGY
IGKV3-NL_1*01_S0688_kim	CAAGTTATATTGACACAGTCTCCAGCCACCCTGTCTTTGTCTCCAGGGGAAAGAGCCACTCTCTCCTGCAGGGCCAGTCAGAGTGTCAGCAGCTACTTAGCCTGGTACCAGCAGAAACCTGGGCAGGCTCCCAGGCTCCTCATCTATGGTGCATCCAGCAGGGCCACTGGTATCCCAGACAGGTTCAGTGGCAGCGGGTCTGGGACAGAGTTCACTCTCACCATCAGCAGCCTGGAGCCTGAAGATGTTGGAGTTTATCACTGCTATCAGCATAGCAGCGGGTACCC	QVILTQSPATLSLSPGERATLSCRASQSVSSYLAWYQQKPGQAPRLLIYGASSRATGIPDRFSGSGSGTEFTLTISSLEPEDVGVYHCYQHSSGY
IGKV3-NL_6*01_S9803_kim	GAAATTGTGATGACGCAGTCCCCAGCCACCCTGTCTTTGTCTCCAGGAGAAAGAGCCACCCTCTCCTGCAGGGCCAGTCAGAGTGTTAGCAGCTACGTAGCCTGGTACCAGCAGAAACCTGAGCAGGCTCCCAGGCTCCTCATCTATGGTGCATCCAGCAGGGCCACTGGCATCCCAGACAGGTTCAGTGGCAGTGGGTCTGGGACAGACTTCACTCTCACCATCAGCAGCCTGGAGCCTGAAGATTTTGCAGTTTATTATTGTCAGCAGTATAGTAACTGGCCTCA	EIVMTQSPATLSLSPGERATLSCRASQSVSSYVAWYQQKPEQAPRLLIYGASSRATGIPDRFSGSGSGTDFTLTISSLEPEDFAVYYCQQYSNWP
IGKV3S9*01_S3316	GAAATTGTGATGACGCAGTCCCCAGCCACCCTGTCTTTGTCTCCAGGAGAAAGAGCCACCCTCTCCTGCAGGGCCAGTCAGAGTGTTAGCAGCTACGTAGCCTGGTACCAGCAGAAACCTGAGCAGGCTCCCAGGCTCCTCATCTATGGTGCATCCAGCAGGGCCACTGGCATCCCAGACAGGTTCAGTGGCAGTGGGTCTGGGACAGACTTCACTCTCACCATCAGCAGCCTGGAGCCTGAAGATGTAGGAGTTTATTACTGTCAGCAGTATAATAACTGGAAC	EIVMTQSPATLSLSPGERATLSCRASQSVSSYVAWYQQKPEQAPRLLIYGASSRATGIPDRFSGSGSGTDFTLTISSLEPEDVGVYYCQQYNNWN
IGKV4S1*01_S7146	GACATTGTGATGACCCAGTCTCCAGACTCCCTGGCTGTGTCTCTGGGAGAGAGGGTCACCATCAACTGCAAGTCCAGCCAGAGTCTTTTATACAGCTCCAACAATAAGAACTACTTAGCCTGGTACCAGCAGAAACCAGGACAGGCTCCTAAGCTGCTCATTTACTGGGCATCTACCCGGGAATCCGGGGTCCCTAACCGATTCAGTGGCAGCGGGTCTGGGACAGATTTCACTCTCACCATCAGTGGCCTGCAGGCTGAAGATGTGGCAGTTTATTACTGTCAGCAGCATTACAGCTCTCCTCT	DIVMTQSPDSLAVSLGERVTINCKSSQSLLYSSNNKNYLAWYQQKPGQAPKLLIYWASTRESGVPNRFSGSGSGTDFTLTISGLQAEDVAVYYCQQHYSSP
IGKV5-11*01_S4599_kim	GAAACGATACTCACACAGTCTGCGGCATTCATGTCAGCGACTCCAGGAGACAAAGTCACCATCTCCTGCAAAGCCAGCCAAGACATTGATGATGACATGAACTGGTACCAACAGGAACCAGGAGAAGCTCCTAAACTCATTATTAAAGATGCTACTACTCTCGTTTCTGGAATCCCACCTCGATTCAGTGGCAGCGGGTATGGAACAGATTTTACTCTCACAATTAATAATGTAGAATCTGAGGATGCTGCATATTACTTCTGTCTACAACATGATAATTTCCCTCT	ETILTQSAAFMSATPGDKVTISCKASQDIDDDMNWYQQEPGEAPKLIIKDATTLVSGIPPRFSGSGYGTDFTLTINNVESEDAAYYFCLQHDNFP
IGKV5-11*02_kim_S7439	GAAACGATACTCACACAGTCTGCGGCATTCGTGTCAGCGACTCCAGGAGACAAAGTCACCATCTCCTGCAGAGCTGGCCAAGACATTGATGATGACATGAACTGGTACCAACAGGAACCAGGAGAAGCTCCTAAACTCATTATTAAAGATGCTACTACTCTCGTTTCTGGAATCCCACCTCGATTCAGTGGCAGCGGGTATGGAACAGATTTTACTCTCACAATTAATAATGTAGAATCTGAGGATGTATCTGTCTACAACATGATAATTTCCCTCT	ETILTQSAAFVSATPGDKVTISCRAGQDIDDDMNWYQQEPGEAPKLIIKDATTLVSGIPPRFSGSGYGTDFTLTINNVESEDVSVYNMIISL
IGKV5-5*01_kim	GAAATGATACTCACACAGTCTCCGGCATTTGTGTCAGCGACTCCAGGAGACAAAGTCACCATCTCCTGCAGAGCTGGCCAAGACATTGATGATGATATGAACTGGTATCAACAGGAACCAGGAGAAGCTCCTAAACTTATTATTAAAGATGCTACTACTCTCGTTTCTGGCATCCCACCTCAATTCAGTGGCAGTGGGTATGGGATAGATTTTACCCTGACAATTAATAGCATGAAATCTGAGGATACTGCATATTACTTCTGCCAACAGAGGGATAATACACCTCT	EMILTQSPAFVSATPGDKVTISCRAGQDIDDDMNWYQQEPGEAPKLIIKDATTLVSGIPPQFSGSGYGIDFTLTINSMKSEDTAYYFCQQRDNTP
IGKV6-47*02_kim	GATATTGTGATGACTCAGTCTCCAGCCTTCGTCTCTGTGACTCCAGGGGAGAAAGTCACCATCACCTGCCAGGCCAGTGAGGGCATTAGCAACTACTTACACTGGTACCAGCAGAAACCAGATCAAGCCCCAAAGCTCTTCATCCAGTATGCTTCCCAGTCCATCTCAGGGGTCCCCTCGAGGTTCACTGGCAGCGGATCTGGGACAGATTTCACTTTTACCATCAGTAGCCTGGAAGTTGAAGATGCTGCAACATATTACTGTCAGCAGGGCAATAAGCACCCT	DIVMTQSPAFVSVTPGEKVTITCQASEGISNYLHWYQQKPDQAPKLFIQYASQSISGVPSRFTGSGSGTDFTFTISSLEVEDAATYYCQQGNKHP
IGKV6-55*01_S2457_kim	GAAATTGTGCTGACTCAGTCTCCAGCCTTTCGGTCTGTGACTCTAAAGGAGAAAGTCACCATCACCTGCCAGGCCAGTCAGAGCATTGGTAGTAGCTTACACTGGTACCAGCAGAAACCGGATCAGTCTCCAAAGCTCCTCATCAAGTATGCTTCCCAGTCCATCTCAGGGGTCCCCTCAAGGTTCAGTGGCAGTGGATCTGGGACAGATTTCACCCTCACCATCAATAGCCTGGAAGCTGAAGATGCTGCGACGTATTACTGTCAGCAGGGTAGTAGTTTCCCTCA	EIVLTQSPAFRSVTLKEKVTITCQASQSIGSSLHWYQQKPDQSPKLLIKYASQSISGVPSRFSGSGSGTDFTLTINSLEAEDAATYYCQQGSSFP
IGKJ1*01	GTGGACGTTCGGCCAAGGGACCAAGGTGGAAATCAAAC	WTFGQGTKVEIK
IGKJ2*01	TGTACAGTTTTGGCCAGGGGACCAAAGTGGAGATCAAAC	YSFGQGTKVEIK
IGKJ3*01	ATTCACTTTCGGCCCCGGGACCAAACTGGATATCAAAC	FTFGPGTKLDIK
IGKJ4*01	GCTCACTTTCGGCGGAGGGACCAAGGTGGAGATCAAAC	LTFGGGTKVEIK
IGKJ4*01_S4126	GCTCACTTTCGGCGGAGGGACCAAGGTGGAGCTCAAAC	LTFGGGTKVELK
IGKJ4*01_S8536	GCTCACTTTCGGCGGAGGGACCAAAGTGGAGATCAAAC	LTFGGGTKVEIK

## Sheet: H03_IGL
Allele	Sequence (NT)	Sequence (AA)
IGLV1-60*01_kim	CAGTCTGTGCTGACTCAGCCTCCCTCAGCGTCTGAGGCCGCCAGGAAGAGTGTCACCATCTCCTGTTCTGGAAGCAGCTCCAACATCGGAAGTAATAGTGTATCCTGGTACCAGCAGCTCCCAGGAACAGCTCCCAAACTCCTCATCTATTATAATGATCAACGAGCCTCAGGTGTCTCTGACCGATTCTCTGGCTCCAAGTCTGGCACGTCAGCCTCCCTGGCCATCAGTGGGCTCCAGACCGAGGATGAGGCTGATTATTACTGCGCAGCATGGGATGATAGCCTGAGCGGTCC	QSVLTQPPSASEAARKSVTISCSGSSSNIGSNSVSWYQQLPGTAPKLLIYYNDQRASGVSDRFSGSKSGTSASLAISGLQTEDEADYYCAAWDDSLSG
IGLV1-65*01_S2037	CAGTCTGTGCTGACGCAGCCGCCCTCAGTGTCTGGGGCCCCCGGGCAGAGGGTCACCATCTCGTGCACTGGGAGCAGCTCCAACATTGGAGGTTATGATGTACACTGGTACCAGCAGTTCCCAGGAACGGCCCCCAAACTCCTCATCTATGACAATAATAAGCGACCCTCAGGGGTTTCTGACCGATTCTCTGGCTCCAAGTCTGGTACCTCAGCCTCCCTGACCATCACTGGGCTCCAGCCTGGGGATGAGGCTGATTATTACTGCGGAGCATGGGATAGCAGCCTGAGTGCTCA	QSVLTQPPSVSGAPGQRVTISCTGSSSNIGGYDVHWYQQFPGTAPKLLIYDNNKRPSGVSDRFSGSKSGTSASLTITGLQPGDEADYYCGAWDSSLSA
IGLV1-67*01_S1235_kim	CAGTCTGTGCTGACGCAGCCGCCCTCAGTGTCTGCGGCCCCAGGGCAGAAGGTCACCATCTCCTGCTCTGGAAGCAGCTCCAACATCGGGAGAAGTTATGTATCCTGGTACCAGCAGGTCCCAGGAACGGCCCCCAAACTCCTCATCTATGACAATAATAAGCGACCCTCAGGGGTTTCTGACCGATTCTCTGGCTCCAAGTCTGGTACCTCAGCCTCCCTGGCCATCACTGGACTCCAGACTGGAGATGAGGCTGATTATTACTGCTCAGCATGGGATAGCAGCCTGAGTGCTCA	QSVLTQPPSVSAAPGQKVTISCSGSSSNIGRSYVSWYQQVPGTAPKLLIYDNNKRPSGVSDRFSGSKSGTSASLAITGLQTGDEADYYCSAWDSSLSA
IGLV1-67*02_S3949	CAGTCTGTGCTGACGCAGCCGCCCTCAGTGTCTGCGGCCCCAGGGCAGAAGGTCACCATCTCCTGCTCTGGAAGCAGCTCCAACATCGGGAGAAGTTATGTATCCTGGTACCAGCAGTTCCCAGGAACGGCCCCCAAACTCCTCATCTATCAAGATAATAAGCGACCCTCAGGGGTTTCTGACCGATTCTCTGGCTCCAAGTCTGGTACCTCAGCCTCCCTGGCCATCACTGGACTCCAGACTGGAGATGAGGCTGATTATTACTGCGGAGCATGGGATAGCAGCCTGAGTGCTCA	QSVLTQPPSVSAAPGQKVTISCSGSSSNIGRSYVSWYQQFPGTAPKLLIYQDNKRPSGVSDRFSGSKSGTSASLAITGLQTGDEADYYCGAWDSSLSA
IGLV1-72*01_S2251_kim	CAGTCTGTGCTGACTCAACCACCCTCAGCGTCTGGGGCCCCCGGGCAGAGTGTCACCATCTCCTGTTCTGGAAGCAGCTCCAACATCGGAAGTAATTATGTATACTGGTACCAGCAGCTCTCAGGAAAGGCCCCCAAACTCCTCATCTATAATAATAATCAGCGACCCTCAGGGGTCCCTGATCGATTCTCTGGCTCCAAGTCTGGCACGTCAGCCTCCCTGGCCATCAGTGGGCTCCAGTCCGAGGATGAGGCTGATTATTACTGCTCAGCATGGGATAGCAGCCTGAGCGATCC	QSVLTQPPSASGAPGQSVTISCSGSSSNIGSNYVYWYQQLSGKAPKLLIYNNNQRPSGVPDRFSGSKSGTSASLAISGLQSEDEADYYCSAWDSSLSD
IGLV1-72*02_S1108_kim	CAGTCTGTGCTGACTCAACCACCCTCAGCGTCTGGGGCCCCCGGGCAGAGTGTCACCATCTCCTGTTCTGGAAGCAGCTCCAACATCGGAAGTAATTATGTATACTGGTACCAGCAGCTCTCAGGAAAGGCCCCCAAACTCCTCATCTATAATAATAATCAGCGACCCTCAGGGGTCCCTGATCGATTCTCTGGCTCCAAGTCTGGCACGTCAGCCTCCCTGGCCATCAGTGGGCTCCAGTCCGAGGATGAGGCTGATTATTACTGCTCAGCATGGGATAGCAGCCTGAGCGGTCC	QSVLTQPPSASGAPGQSVTISCSGSSSNIGSNYVYWYQQLSGKAPKLLIYNNNQRPSGVPDRFSGSKSGTSASLAISGLQSEDEADYYCSAWDSSLSG
IGLV1-81*01_S9125_kim	CAGTCTGTGCTGACTCAGCCACCCTCAGCGTCTGGGGCTCCCGGGCAGAGTGTCACCATCTCCTGTTCTGGAAGCAGCTCCAACATTGGAAGTAATGATGTGTACTGGTACCAGCAGTTCCCAGGAACGGCCCCCAAACTCCTCATCTATTATAGTAATCAGCGACCCTCAGGGGTCCCTGACCGATTCTCTGGCTCCAAGTCTGGCACGTCAGCCTCCCTGGCCATCACTGGTCTCCGGTCTGAAGATGAGGCTGATTATTACTGTGCAGCATGGGATAACAGCCTGAGCGGTCC	QSVLTQPPSASGAPGQSVTISCSGSSSNIGSNDVYWYQQFPGTAPKLLIYYSNQRPSGVPDRFSGSKSGTSASLAITGLRSEDEADYYCAAWDNSLSG
IGLV1-NL_9*01_S0298_kim	CAGTCTGTGCTGACGCAGCCGCCCTCAGCATCTGGGGCCCCCGGGCAGAGGGTCACCATCTCCTGCACTGGGAGCAGCTCCAACATCGGGGCGGGTTATTATGTATCCTGGTACCAGCAATTCCCAGGAACGGCCCCCAAACTCCTCATCTATGAAAATAATAAGCGACCCTCAGGGGTTTCTGACCGATTCTCTGGCTCCAAGTCTGGTACCTCAGCCTCCCTGACCATCACTGGGCTCCAGTCTGAGGATGAGGCTGATTATTACTGCGGAGCATGGGATAACAGCCTGAGTGCTCA	QSVLTQPPSASGAPGQRVTISCTGSSSNIGAGYYVSWYQQFPGTAPKLLIYENNKRPSGVSDRFSGSKSGTSASLTITGLQSEDEADYYCGAWDNSLSA
IGLV10-114*01_kim	CAGGCAGGGCTGACTCAGCCACCCTCAGTGTCCAAGGGCTTGAGACAGACGGCCACGCTCACCTGCACTGGAAACAGCAACAATGTTGGCAACCAGGGAGCAGCTTGGCTGCAGCAGCACCAGGGCCACCCTCCCAAACTGCTGTCCTACAGGAATAACAACCGGCCCTCGGGGATCTCAGAGAGATTCTCTGCATCCAGGTCAGGAAACACAGCCTCCCTGACCATCACCGGACTCCAACCTGAGGATGAGGCTGACTATTACTGCTCAGCATGGGACAGCAGCCTCAGTGCTCA	QAGLTQPPSVSKGLRQTATLTCTGNSNNVGNQGAAWLQQHQGHPPKLLSYRNNNRPSGISERFSASRSGNTASLTITGLQPEDEADYYCSAWDSSLSA
IGLV11-117*01_kim	CAGCCTGTGCTGACTCAGCCACCCTCCCTGTCTGCATCCCCGGGAGCATCGGCCAGACTCCCCTGCACCCTGAGCAGTGACCTCAGTGTTGGTAGTAAAAACATGTACTGGTACCAGCAGAAGCCAGGGAGCGCTCCCAGGTTATTCCTGTACTACTACTCCGACTCAGACAAGCAGCTGGGACCTGGGGTCCCCAATCGAGTCTCTGGCTCCAAGGAGACCTCAAGTAACACAGCGTTTTTGCTCATCTCTGGGCTCCAGCCTGAGGACGAGGCCGATTATTACTGTCAGGTGTATGACAGTAGTGCTAAT	QPVLTQPPSLSASPGASARLPCTLSSDLSVGSKNMYWYQQKPGSAPRLFLYYYSDSDKQLGPGVPNRVSGSKETSSNTAFLLISGLQPEDEADYYCQVYDSSAN
IGLV1S1*01_S2720_kim	CAGTCTGTGCTGACGCAGCCGCCCTCAGTGTCTGGGGCGCCCGGGCAGAGGGTCACCATCTCCTGCACTGGGAGCAGCTCCAACATCGGGGCGGGTTATTATGTGCAGTGGTACCAGCAGCTTCCAGGAACGGCCCCCAAACTCCTCATCTATGAAAATAATAAGCGACCCTCAGGGGTTTCTGATCGATTCTCTGGCTCCAAGTCTGGTACCTCAGCCTCCCTGACCATCACTGGACTCCAGTCTGAGGATGAGGCTGATTATTACTGCCAGTCCTATGACAGCAGCCTGAGTGCTCA	QSVLTQPPSVSGAPGQRVTISCTGSSSNIGAGYYVQWYQQLPGTAPKLLIYENNKRPSGVSDRFSGSKSGTSASLTITGLQSEDEADYYCQSYDSSLSA
IGLV1S2*01_S7035_kim	CAGTCTGTGCTGACGCAGCCGCCCTCAGTGTCTGGGGCGCCCGGGCAGAGGGTCACCATCTCCTGCACTGGGAGCAGCTCCAACATTGGGGCGGGTTATGGTGTGCAGTGGTACCAGCAGCTTCCAGGAACGGCCCCCAAACTCCTCATCTATGAAAATAATAAGCGACCCTCAGGGGTTTCTGATCGATTCTCTGGCTCCCAGTCTGGTACCTCAGCCTCCCTGACCATCACTGGACTCCAGTCTGAGGATGAGGCTGATTATTACTGCCAGTCCTATGACAGCAGCCTGAGTGCTCA	QSVLTQPPSVSGAPGQRVTISCTGSSSNIGAGYGVQWYQQLPGTAPKLLIYENNKRPSGVSDRFSGSQSGTSASLTITGLQSEDEADYYCQSYDSSLSA
IGLV2-13*02_S2096_kim	CAGGCTGCCCTGACTCAGTCTCCCTCTGTGTCTGGGTCTCCTGGACAGTCGGTCACCATCTCCTGCACTGGAACCAGCAGTGACATTGGTGGTTATAACCGTGTCTCCTGGTACCAACAGCACCCAGGCAAAGCCCCCAAACTCATGATTTATGAGGTCAGTAAGCGGCCCTCAGGGGTCTCTGATCGCTTCTCTGGTTCCAAGTCTGGCAACACGGCCTCCCTGACCATCTCTGGGCTCCAGGCTGAGGACGAGGCTGATTATTACTGCAGCTCATATGCAAGCAGTAGCACTTTC	QAALTQSPSVSGSPGQSVTISCTGTSSDIGGYNRVSWYQQHPGKAPKLMIYEVSKRPSGVSDRFSGSKSGNTASLTISGLQAEDEADYYCSSYASSSTF
IGLV2-19*01_kim	CAGGCTGCCCCGACTCAGCCTCCCTCTGTGTCCGGGTCTCCTGGACAGTCGGTCACCATCTCCTGCACTGGAACCAGCAGTGATATTGGGTATTATAATGCTGTGTCTTGGTACCAACAGCATCCAGGCAAAGCCCCCAAACTCATGATTTATGAGGTCAGTAAGCGGCCCTCAGGGGTCTCTGATCGCTTCTCTGGCTCCAAGTCTGGCAACACGGCCTCCCTGACCATCTCTGGGCTCCAGGCTGAGGACGAGGCTGATTATTACTGCAGCTCATATGCAGGTAGTGGTACTTTC	QAAPTQPPSVSGSPGQSVTISCTGTSSDIGYYNAVSWYQQHPGKAPKLMIYEVSKRPSGVSDRFSGSKSGNTASLTISGLQAEDEADYYCSSYAGSGTF
IGLV2-23*01_kim	CAGGCTGCCCTGACTCAGCCTCCCTCTGTGTCTGGGTCTCCTGGACAGTCGGTCACCATCTCCTGCACTGGAACCAGCAGTGACATCGGTGGTTATAACTATGTCTCCTGGTACCAGCAGCACCCAGGCAAAGCCCCCAAACTCATGATTTATGATGTCAGTAAGCGGCCCTCAGGGGTCTCTGATCGCTTCTCTGGCTCCAAATCTGGCAACACGGCCTCCCTGACCATCTCTGGGCTCCAGGCTGAGGATGAGGCTGATTATTACTGCAGCTCATATGCAGGCAGCAACACTTTC	QAALTQPPSVSGSPGQSVTISCTGTSSDIGGYNYVSWYQQHPGKAPKLMIYDVSKRPSGVSDRFSGSKSGNTASLTISGLQAEDEADYYCSSYAGSNTF
IGLV2-23*02_S2384_kim	CAGGCTGCCCTGACTCAGCCTCCCTCTGTGTCCGGGTCTCCTGGACAGTCGGTCACCATCTCCTGCACTGGAACCAGCAGTGACATTGGTGGTTATAACCGTGTCTCCTGGTACCAACAGCACCCAGGCAAAGCCCCCAAACTCATGATTTATGAGGTCAGTAAGCGGCCCTCAGGGGTCTCTGATCGCTTCTCTGGCTCCAAGTCTGGCAACACGGCCTCCCTGACCATCTCTGGGCTCCAGGCTGAGGACGAGGCTGATTATTACTGCAGCTCATATGCAGGCAGCGACACTTTC	QAALTQPPSVSGSPGQSVTISCTGTSSDIGGYNRVSWYQQHPGKAPKLMIYEVSKRPSGVSDRFSGSKSGNTASLTISGLQAEDEADYYCSSYAGSDTF
IGLV2-26*02_kim	CAGGCTGCCCTGACTCAGCCTCCCTCAGTGTCCAAGTCTCTTGGACAGTCGGTCACCATCTCCTGCGCTGGAACCAGCAGTGGCATTGCTAGTTATAGTGACGTCTCCTGGTACCAGCAGCACCCAGGCACAGCCCCCAGACTCCTGATTTACCGTGTCAGTAATCGACCCTCAGGGGTCTCTGATCGCTTCTCTGGCTTCAAGTCTGGCAGCACAGCCTCCCTGACCATCTCTGGGCTCCAGGCTGAGGACGAGGCTATTTATTACTGCTGCTCATATAGGAGTGGAAGCACTTTC	QAALTQPPSVSKSLGQSVTISCAGTSSGIASYSDVSWYQQHPGTAPRLLIYRVSNRPSGVSDRFSGFKSGSTASLTISGLQAEDEAIYYCCSYRSGSTF
IGLV2-32*02_kim	CAGGCTGCCCTGACTCAGCCTCGCTCAGTGTCTGGGTCTCCTGGACAGTCGGTCACCATCTCCTGCACTGGAACCAGCAGTGACATCGGTGGTTATAACTATGTCTCCTGGTACCAACAGCATCCAGGCACAGCCCCCAAACTCATGATTTATGAGGTCAGTAAGCGGCCCTCAGGGGTCTCTGATCGCTTCTCTGGCTCCAAGTCTGGCAACACGGCCTCCCTGACCATCTCTGGGCTCCAGGCTGAGGACGAGGCTGATTATTACTGCAGCTCATATGCAGGCAGCAACACTTTC	QAALTQPRSVSGSPGQSVTISCTGTSSDIGGYNYVSWYQQHPGTAPKLMIYEVSKRPSGVSDRFSGSKSGNTASLTISGLQAEDEADYYCSSYAGSNTF
IGLV2-38*01_kim_S3450	CAGTCTGCCCTGACTCAGCCTCCCTCAGTGTCCGGGTCTCCTGGACAGTCGGTCACCATCTCCTGCACTGGAACCAGCAGTGACGTTGGTGGTTATAACTATGTCTCCTGGTACCAGCAGCACTCAGGCACAGCCCCCAGACTCCTGATTTATGAGGTCAGTAAGCGGCCCTCAGGGGTCTCTGATCGCTTCTCTGGCTCCAAGTCTGGCAACACGGCCTCCCTGACCATCTCTGGGCTCCAGGCTGAGGATGAGGCTGATTATTACTGCGGCTCATATAGGAGTGGAAGCACTTTC	QSALTQPPSVSGSPGQSVTISCTGTSSDVGGYNYVSWYQQHSGTAPRLLIYEVSKRPSGVSDRFSGSKSGNTASLTISGLQAEDEADYYCGSYRSGSTF
IGLV2-46*01_S4740_kim	CAGGCTGCCCCGACTCAGCCTCCCTCTGTGTCTGGGTCTCCTGGACAGTCGGTCACCATCTCCTGCACTGGAACCAGCAGTGATATTGGGTATTATAATGCTGTGTCTTGGTACCAACAGCACCCAGGCACAGCCCCCAAACTCATGATTTATGGTGTCAGTAATCGGCCCTCAGGGGTCTCTGATCGCTTCTCTGGCTCCAAGTCTGGCAACACGGCCTCCCTGACCATCTCTGGGCTCCAGGCTGAGGACGAGGCTGATTATTACTGTTGTTCATATACAACCAGTAGCACTTTC	QAAPTQPPSVSGSPGQSVTISCTGTSSDIGYYNAVSWYQQHPGTAPKLMIYGVSNRPSGVSDRFSGSKSGNTASLTISGLQAEDEADYYCCSYTTSSTF
IGLV2-NL_2*01_S1676	CAGTCTGCCCTGACTCAGCCTCCCTCAGTGTCCGGGTCTCCTGGACAGTCGGTCACCATCTCCTGCACTGGAACCAGCAGTGACGTTGGTGGTTATAACTATGTCTCCTGGTACCAGCAGCACTCAGGCACAGCCCCCAGACTCCTGATTTATGAGGTCAGTAAGCGGCCCTCAGGGGTCTCTGATCGCTTCTCTGGCTCCAAGTCTGGCAACACGGCCTCCCTGACCATCTCTGGGCTCCAGGCTGAGGACGAGGCTGATTATTACTGCAGCTCATATGCAGGCAGCAACACTTTC	QSALTQPPSVSGSPGQSVTISCTGTSSDVGGYNYVSWYQQHSGTAPRLLIYEVSKRPSGVSDRFSGSKSGNTASLTISGLQAEDEADYYCSSYAGSNTF
IGLV2S8*01_S1502	CAGGCTGCCCTGACTCAGCCTCGCTCAGTGTCTGGGTCTCCTGGACAGTCGGTCACCATCTCCTGCACTGGAACCAGCAGTGACATCGGTGGTTATAACTATGTCTCCTGGTACCAACAGCATCCAGGCACAGCCCCCAAACTCATGATTTATGAGGTCAGTAAGCGGCCCTCAGGGGTCTCTGATCGCTTCTCTGGCTCCAAGTCTGGCAACACGGCCTCCCTGACCATCTCTGGGCTCCAGGCTGAGGACGAGGCTGATTATTACTGCTGCTCATATAGGAGTGGAAGCACTTTC	QAALTQPRSVSGSPGQSVTISCTGTSSDIGGYNYVSWYQQHPGTAPKLMIYEVSKRPSGVSDRFSGSKSGNTASLTISGLQAEDEADYYCCSYRSGSTF
IGLV2S8*01_S1684	CAGGCTGCCCTGACTCAGCCTCGCTCAGTGTCTGGGTCTCCTGGACAGTCGGTCACCATCTCCTGCACTGGAACCAGCAGTGACATCGGTGGTTATAACTATGTCTCCTGGTACCAACAGCATCCAGGCACAGCCCCCAAACTCATGATTTATGAGGTCAGTAAGCGGCCCTCAGGGGTCTCTGATCGCTTCTCTGGCTCCAAGTCTGGCAACACGGCCTCCCTGACCATCTCTGGGCTCCAGGCTGAGGATGAGGCTGATTATTACTGCGGCTCATATAGGAGTGGAAGCACTTTC	QAALTQPRSVSGSPGQSVTISCTGTSSDIGGYNYVSWYQQHPGTAPKLMIYEVSKRPSGVSDRFSGSKSGNTASLTISGLQAEDEADYYCGSYRSGSTF
IGLV2S9*01_S6577_kim	CAGGCTGCCCTGACTCAGCCTCCCTCAGTGTCCAAGTCTCTTGGACAGTCGGTCACCATCTCCTGCACTGGAACCAGCAGTGACGTTGGTGGTTATAATGACGTCTCCTGGTACCAGCAGCACCCAGGCACAGCCCCCAGACTCCTGATTTATGATGTCAGTAAGCGGCCCTCAGGGGTCTCTGATCGCTTCTCTGGCTCCAAGTCTGGCAACACGGCCTCCCTGACCATCTCTGGGCTCCAGGCTGAGGACGAGGCTGATTATTACTGCTGCTCATATAGGAGTGGAAGCACTTTC	QAALTQPPSVSKSLGQSVTISCTGTSSDVGGYNDVSWYQQHPGTAPRLLIYDVSKRPSGVSDRFSGSKSGNTASLTISGLQAEDEADYYCCSYRSGSTF
IGLV3-14*01_kim	TCCTATGAGCTGACTCAGCCACTCTCAGTGTCAGTGGCCCTGGGACAGATGGCCAGGATCACTTGTGGGGGAAACAATATTGGAAGAAAATATGTGTACTGGTACCAGCAGAAGCCAGACCAGGCCCCTGTGCTGGTCATCTATGAGGATAGCAAGCGGCCCTCGGGGATCCCTGAGCGATTCGCTGGCTCCAACTCGGGGAACACCGCCACCCTGACCATTGACGGAGCCCAAGCCAGGGATGAGGCTGACTATTACTGTCAGGTGTGGGACAGCAGCACTGCA	SYELTQPLSVSVALGQMARITCGGNNIGRKYVYWYQQKPDQAPVLVIYEDSKRPSGIPERFAGSNSGNTATLTIDGAQARDEADYYCQVWDSSTA
IGLV3-22*01_kim	TCCTATGAGCTGACACAGCCACCCTCAGTGTCAGTGTCCCCAGGACAGACGGCCAGGATCACCTGCTCTGGAGAAATACTGGCAAAAAAATATGCTCAGTGGTTCCAGCAGAAGCCAGGCCAGGCCCCTGTGCTGGTGATATATAAAGACAGTGAGAGGCCCTCAGGGATCCCTGAGCGATTCTCTAGCTCCAGTTCAGGGACAACAGTTACCTTGACCATCAGTGGGGCCCAGGCAGAAGATGAGGCTGACTATTACTGTCAATCAGCAGACAGCAGTGGTAATCATCC	SYELTQPPSVSVSPGQTARITCSGEILAKKYAQWFQQKPGQAPVLVIYKDSERPSGIPERFSSSSSGTTVTLTISGAQAEDEADYYCQSADSSGNH
IGLV3-25*02_S4855_kim	TCCTATGAGCTGACTCAGCCACCCTCGGTGTCAGCGGCCTCAGGACAGACGGCCAGGATCACCTGTGGGGGAGACAACATTGGAAGTAAAAATGTGCACTGGTACCAGCAGAAGCCACCGCAGGCCCCTGTGCTGGTCATCTATGCTGATAGCAAACGGCCCTCAGGGATCCCTGAGCGATTCTCTGGCTCCAACTCAGGGAACACCGCCACCCTGACCATCAGCAGGGTCGAGGCCGGGGATGAGGCTGACTATTACTGTCAGGTGTGGGACAGTAGTAGTAAATACGC	SYELTQPPSVSAASGQTARITCGGDNIGSKNVHWYQQKPPQAPVLVIYADSKRPSGIPERFSGSNSGNTATLTISRVEAGDEADYYCQVWDSSSKY
IGLV3-27*01_S9868_kim	TCTTCTGAGCTGACTCAGGACCCTGCAGTGTCTGTGGCCTTGGGACAGACAGTCAGGATCACCTGACAAGGAGACAGCCTCAGAAGCTATTATGCAAGCTGGTACCAGCAGAAGCCAGGCCAGGCCCCTGTGCTGGTCGTCTATGGTAACAACAACCGGCCCTCAGGGATCTCAGAGCGATTCTCTGGCTCCAGCTCAGGAAACACAGCTTCCTTGACCATCACTGGGGCTCAGGTGGAAGATGAGGCTGACTATTACTGTGACTCCTGGGACAGCAGTGGTACCCATCCCACAGTGACACAGACAGATGGGGAAGTG	SSELTQDPAVSVALGQTVRIT*QGDSLRSYYASWYQQKPGQAPVLVVYGNNNRPSGISERFSGSSSGNTASLTITGAQVEDEADYYCDSWDSSGTHPTVTQTDGEV
IGLV3-29*01_kim	TCCTATGATGTGACTCAGCCACGCTCAGTGTCTGTGTCCCCAGGACAGACGGCCAGGATCACCTGTGGGGGAGACAACATTGGAAGTAAAGTTGTGCACTGGTACCAGCAGAAGCCAGCGCAGGCCCCTGTGCTGGTCATCTATAGAGATAGCAAACGGCCCTCAGGGATCCCTGAGCGATTCTCTGGCTCCAACTCAGGGAACACGGCCACCCTGACCATCAGCGGGGTCGAGGCCGGGGATGAGGCTGACTATTACTGTCAGGTGTGGGACAGTAGTAGTGATCATCC	SYDVTQPRSVSVSPGQTARITCGGDNIGSKVVHWYQQKPAQAPVLVIYRDSKRPSGIPERFSGSNSGNTATLTISGVEAGDEADYYCQVWDSSSDH
IGLV3-33*03_S3061_kim	TCCTCTGAGCTGACTCAGGAGCCTGCATTGTCTGTGGCCTTGGGACATACAGTCAGCATGACCTGCCAAGGAGATAGCCTCAAAACCTATTATGCAAGCTGGTACCAGCAGAAGCCAGGCCAGGTCCCTGTGCTGGTCATCTATGGTAACAACTACCGGCCCTCAGGGATCCCAGGCCGATTCTCTGTCTCCTGGTCAGGAAACACAGGTTCCTTGACCATCACTGCGGCTCAGGTGGAAGATGAGGCTGACTATTACTGTAACTCCTGGGACAGCAGCGGTACCCATCT	SSELTQEPALSVALGHTVSMTCQGDSLKTYYASWYQQKPGQVPVLVIYGNNYRPSGIPGRFSVSWSGNTGSLTITAAQVEDEADYYCNSWDSSGTH
IGLV3-40*01_kim	TCCTATGAGCTGACTCAGCCACGCTCAGTGTCCGTGTCCCCAGGACAGACGGCCAGGATCACCTGTGGGGGAGACAACATTGGAAGTAAAAGTGTGCAGTGGTACCAGCAGAAGCCACCGCAGGCCCCTGTGCTGGTCATCTATGCTGATAGCGAACGGCCCTCAGGGATCCCTGAGCGATTCTCTGGCTCCAACTCAGGGAACACCGCCACCCTGACCATCAGCGGGGTCGAGGCCGGGGATGAGGCTGACTATTACTGTCAGGTGTGGGACAGTAGTAGTGATCATCC	SYELTQPRSVSVSPGQTARITCGGDNIGSKSVQWYQQKPPQAPVLVIYADSERPSGIPERFSGSNSGNTATLTISGVEAGDEADYYCQVWDSSSDH
IGLV3-NL_2*01_S0436_kim	TCCTATGAGCTGACTCAGCCACGCTCGGTGTCGGTGTCCCAGGGACAGACGGCCAGGATCACCTGTGGGGGAGACAACATTGGAAGTGAAGCTGTGCACTGGTACCAGCAGAAGCCAGCGCAGGCCCCTGTGCTGGTCATCTATGATGATAGCGAACGGCCCTCAGGGATCCCTGATCGATTCTCTGGCTCCAAATCAGGGAACACCGCCACCCTGACCATCAGCGGGGTCGAGGCCGGGGATGAGGCTGACTATTACTGTCAGGTGTGGGACAGTAGTAGTGATCATCC	SYELTQPRSVSVSQGQTARITCGGDNIGSEAVHWYQQKPAQAPVLVIYDDSERPSGIPDRFSGSKSGNTATLTISGVEAGDEADYYCQVWDSSSDH
IGLV3-NL_4*01_S1791_kim	TCCTATGATCTGACTCAGCCACCCTCGGTGTCAGTGTCCCCAGGACAGACGGCCAGGATCACCTGTGGGGGAGACAACATTGGAAGTGAAGTTGTGAACTGGTACCAGCAGAAGCCACCGCAGGCCCCTGTGCTGGTCATCTATGCTGATAGCGAACGGCCCTCAGGGATCCCTGAGCGATTCTCTGGCTCCAAATCAGGGAACACGGCCACCCTGACCATCAGCGGGGTCGAGGCCGGGGATGAGGCTGACTATTACTGTCAGGTGTGGGACAGTAGTAGTGATCATCC	SYDLTQPPSVSVSPGQTARITCGGDNIGSEVVNWYQQKPPQAPVLVIYADSERPSGIPERFSGSKSGNTATLTISGVEAGDEADYYCQVWDSSSDH
IGLV3-NL_4*01_S2474	TCCTATGATCTGACTCAGCCACCCTCGGTGTCTGTGTCCCCAGGACAGACGGCCAGGATCACCTGTGGGGGAGACAACATTGGAAGTGAAGTTGTGAACTGGTACCAGCAGAAGCCACCGCAGGCCCCTGTGCTGGTCATCTATGGAGATAGCGAACGGCCCTCAGGGATCCCTGAGCGATTCTCTGGCTCCAAATCAGGGAACACCGCCACCCTGACCATCAGCGGGGTCGAGGCCGGGGATGAGGCTGACTATTACTGTCAGGTGTGGGACATTAGTAGTGATCATCC	SYDLTQPPSVSVSPGQTARITCGGDNIGSEVVNWYQQKPPQAPVLVIYGDSERPSGIPERFSGSKSGNTATLTISGVEAGDEADYYCQVWDISSDH
IGLV3-NL_4*01_S2847_kim	TCCTATGATCTGACTCAGCCACCCTCGGTGTCAGTGTCCCCAGGACAGACGGCCAGGATCACCTGTGGGGGAGACAACATTGGAAGTGAAGTTGTGAACTGGTACCAGCAGAAGCCACCGCAGGCCCCTGTGCTGGTCATCTATGCTGATAGCGAACGGCCCTCAGGGATCCCTGAGCGATTCTCTGGCTCCAAATCAGGGAACACGGCCACCCTGACCATCAGCGGGGTCGAGGCCGGGGATGAGGCTGACTATTACTGTCAGGTGTGGGACATTAGTAGTGATCATCC	SYDLTQPPSVSVSPGQTARITCGGDNIGSEVVNWYQQKPPQAPVLVIYADSERPSGIPERFSGSKSGNTATLTISGVEAGDEADYYCQVWDISSDH
IGLV3S11*01_S1234_kim	TCCTCTGGGCTGACTCAGGAGCCTGCATTGTCTGTGGCCTTGGGACATACAGTCAGGATGACCTGCCAAGGAGACAGCCTCAAAACCTATTATGCAAGCTGGTACCAGCAGAAGCCAGGCCAGGTCCCTGTGCTGGTCATCTATGGTAACACCAATAGGCCCTCAGGGATCCCAGGCCGATTCTCTGGCTCCTGGTCAGGAAACACAGGTTCCTTGACCATCACTGGGGCTCAGGTGGAAGATGAGGCTGACTATTACTGTGGCTCCTGGGATAACAGTGGTAACCATTC	SSGLTQEPALSVALGHTVRMTCQGDSLKTYYASWYQQKPGQVPVLVIYGNTNRPSGIPGRFSGSWSGNTGSLTITGAQVEDEADYYCGSWDNSGNH
IGLV3S14*01_kim	TCCTATGAGCTGACACAGCCACCCTCGGTGTCAGTGTCTCCCGGACAGACGGCCAAGATCACCTGCTCTGGAGAAATACTGGCAAAAAAATATGCTCGGTGGTTCCAGCAGAAGCCAGGCCAGGCCCCTGTGCTGGTGATTTATAAAGACAGTGAGCGCCCCTCAGGGATTCCTGAACGTTTCTCTGGCTCCAGCTCAGGGACCACAGTCACCCTGACCGTCAGTGGGGCCCAGGCTGAGGATGAGGCTGACTATTACTGTTACTCTGGGGATGACAACAATCT	SYELTQPPSVSVSPGQTAKITCSGEILAKKYARWFQQKPGQAPVLVIYKDSERPSGIPERFSGSSSGTTVTLTVSGAQAEDEADYYCYSGDDNN
IGLV4-NL_1*03_S6389_kim	CAGCCTGTGCTGACTCAGTCGCCTTCTGCCTCTGCCTCCCTGGGAGCCTCGGTCAAGCTCACCTGCACTCTGAGCAGTGGGCACAGCAGCTACACCATCGCATGGCATCAGCAGCAGCAAGGGAAGGCCCCTCGGTACTTGATGTGGCTTAAAAGTGATGGCAGCCACAGCAAGGGGGACGGGATCCCTGATCGTTTCTCAGGCTCCAGCTCCGGGGCTGAGCGCTACCTCACCATCTCCAACCTCCAGTCTGAGGATGAGGCTGATTATTACTGTCAGACCTGGACTACTGGCATTCA	QPVLTQSPSASASLGASVKLTCTLSSGHSSYTIAWHQQQQGKAPRYLMWLKSDGSHSKGDGIPDRFSGSSSGAERYLTISNLQSEDEADYYCQTWTTGI
IGLV4-NL_1*03_kim_S1877	CAGCCTGTGCTGACTCAGTCGCCTTCTGCCTCTGCCTCCCTGGGAGCCTCGGTCAAGCTCACCTGCACTCTGAGCAGTGGGCACAGCAGCTACGCCATCGCATGGCATCAGCAGCAGCAAGGGAAGGCCCCTCGGTACTTGATGTGGCTTAAAAGTGATGGCAGCCACAGCAAGGGGGACGGGATCCCTGATCGCTTCTCAGGCTCCAGCTCCGGGGCTGAGCGCTACCTCACCATCTCCAACCTCCAGTCTGAGGATGAGGCTGATTATTACTGTCAGACCTGGGATACTGGCATTCA	QPVLTQSPSASASLGASVKLTCTLSSGHSSYAIAWHQQQQGKAPRYLMWLKSDGSHSKGDGIPDRFSGSSSGAERYLTISNLQSEDEADYYCQTWDTGI
IGLV5-62*01_kim_S7514	AAGCCTATGCTGACTCAGCCGGCCTCCCTCTCAGCATCTCCTGGAGCATCAGCCAGTCTCACATGCACCTTCAGCGGTGGCATCAATGTTGCTGGCTACCACATATTCTGGTACCAGCAGAAGCCAGGGAGTCCCCCCCGGTATCTTCTGAGGTACAAATCAGACTCAGATAAGGGCCAGGGCTCTGGAGTCCCCAGCCGCTTCTCTGGATCCAAAGATGCTTCAGCGAACACAGGGATTTTACGCATCTCTGGGCTCCAGTCTGAGGATGAGGCTGACTATTACTGTGCCATTGGGCACAGCAGCGGT	KPMLTQPASLSASPGASASLTCTFSGGINVAGYHIFWYQQKPGSPPRYLLRYKSDSDKGQGSGVPSRFSGSKDASANTGILRISGLQSEDEADYYCAIGHSSG
IGLV5-69*01_S3466_kim	CAGCCTGTGCTGACCCAGCCAACCTCCCTCTCAGCATCTCCGGGAGCATCAGCCAGACTCAGCTGCACCTTGAGCAGTGGCATCAATGTTGGTAGTTACAGCATATTCTGGTACCAGCAGAAGCCAGGGAGTCCTCCCCGGTACCTTCTGTACTACTACTCAGACTCAAGTAAGGGCCAGGGCTCTGGAGTCCCCAGCCGCTTCTCTGGATCCAAAGATGCTTCAGCCAATGCAGGGCTTTTACTGATCTCTGGGCTCCAGTCTGAAGATGAGGCTGACTATTACTGTGCCATATGGCACAGCAGCGCTTCT	QPVLTQPTSLSASPGASARLSCTLSSGINVGSYSIFWYQQKPGSPPRYLLYYYSDSSKGQGSGVPSRFSGSKDASANAGLLLISGLQSEDEADYYCAIWHSSAS
IGLV5-83*02_S4213_kim	CAGCCTGTGCTGACTCAGCCAACCTCCCTCTCAGCATCTCCTGGAGCATCAGCCAGACTCACCTGCACCTTGAGCAGTGGCATCAGTGTTGGTAGTTACAGGATATTCTGGTACCAGCAGAAGCCAGGGAGTCCTCCCCGGTATCTTCTGAACTACCACACAGACTCAGATAAGCACCAGGGCTCTGGAGTCCCCAGCCGCTTCTCTGGATCCAAAGATGCTTCGGCCAATGCAGGGATTTTACTCATCTCTGGGCTCCAGTCTGAGGATGAGGCTGACTATTACTGTATGATTTGGCACAACAATGCTTCT	QPVLTQPTSLSASPGASARLTCTLSSGISVGSYRIFWYQQKPGSPPRYLLNYHTDSDKHQGSGVPSRFSGSKDASANAGILLISGLQSEDEADYYCMIWHNNAS
IGLV6-110*02_S1751_kim	GAGGTTGTGTTCACTCAGCCCCATTCTGTGTCGGGGTCTCCGGGGCAGACGGTCACCATCTCCTGCACCCGCAGCAGTGGCAGCATTGACAGTGAATATGTGCAGTGGTACCAGCAGCGCCCGGGCAGTGCCCCCACCACAGTGATTTACAAAGATAACCAAAGACCCTCTGGGGTCCCTGATCGGTTCTCTGGCTCCATTGACAGCTCCTCCAACTCTGCCTCCCTCGCCATCTCTGGGCTAAAGTCTGAGGACGAGGCTGACTACTACTGTCAGTCTGCTGATGGCAGCTACAATCC	EVVFTQPHSVSGSPGQTVTISCTRSSGSIDSEYVQWYQQRPGSAPTTVIYKDNQRPSGVPDRFSGSIDSSSNSASLAISGLKSEDEADYYCQSADGSYN
IGLV6-112*02_kim	GAGGTTGTGTTCACTCAGCCCCATTCTGTGTCGGGGTCTCCGGGGCAGACGGTCACCATCTCCTGCACCCGCAGCAGTGGCAGCATTGACAGTGAATATGTGCAGTGGTACCAGCAGCGCCCGGGCAGTGCCCCCACCACAGTGATTTACAAAGATAACCAAAGACCCTCTGGGGTCCCTGATCGGTTCTCTGGCTCCATCGACAGCTCCTCCAACTCTGCCTCCCTCGCCATCTCTGGGCTGAAGTCTGAGGACGAGGCTGACTACTACTGTCAGTCTTATGACAGCTACAATCC	EVVFTQPHSVSGSPGQTVTISCTRSSGSIDSEYVQWYQQRPGSAPTTVIYKDNQRPSGVPDRFSGSIDSSSNSASLAISGLKSEDEADYYCQSYDSYN
IGLV6-NL_1*01_S4417_kim	GAGGTTGTGTTCACTCAGCCCCATTCTGTGTCGGGGTCTCCGGGGCAGACGGTCACCATCTCCTGCACCCGCAGCAGTGGCAGCATTGGCAGCAGCTATGTGTACTGGTACCAGCAGCGGCCGGGCAGCGCCCCCACCACTGTGATTTACAAAGATAACCAAAGACCCTCTGGGGTCCCTGATCGGTTCTCTGGCTCCATCGACAGCTCCTCCAACTCTGCCTCCCTCACCATCTCTGGACTGAAGTCTGAGGACGAGGCTGACTATTACTGTCAGTCTTATGACAGCAGCAGTTATCA	EVVFTQPHSVSGSPGQTVTISCTRSSGSIGSSYVYWYQQRPGSAPTTVIYKDNQRPSGVPDRFSGSIDSSSNSASLTISGLKSEDEADYYCQSYDSSSY
IGLV6-NL_1*01_S7090_kim	GAGGTTGTGTTCACTCAGCCCCATTCTGTGTCGGGGTCTCTGGGGCAGACGGTCACCATCTCCTGCACCCGCAGCAGTGGCAGCATTGACAACAGCTATGTGTACTGGTACCAGCAGCGGCCGGGCAGCGCCCCCACCACTGTGATTTACAAAGATAACCAAAGACCCTCTGGGGTCCCTGATCGGTTCTCTGGCTCCATCGACAGCTCCTCCAACTCTGCCTCCCTCACCATCTCTGGACTGAAGTCTGAGGACGAGGCTGACTATTACTGTCAGTCTTATGACAGCAGCAGTTATCA	EVVFTQPHSVSGSLGQTVTISCTRSSGSIDNSYVYWYQQRPGSAPTTVIYKDNQRPSGVPDRFSGSIDSSSNSASLTISGLKSEDEADYYCQSYDSSSY
IGLV7-76*01_S1592_kim	CAGGCTGTAGTGACTCAGGAGCCCTCAATGACTGTGTCCCCAGGAGGGACAGTCACTCTCACCTGTGCTTCCAGCACTGGAGCAGTCACCAGTGGTCACTCTCCACACTGGTTCCAGCAGAAACCTGGACAAGCCCCCAAGACACTGATTTATAATACAAACTACAAACACTCCTGGACTCCTGCCCGGTTCTCAGGCTCCCTCCTTGGGGGTAAAGCTGCCCTGACACTGTCAGGTGCGCAGCCTGAGGATGAGGCTGAGTATTACTGCTGGCTGTACTATAGTGGTGCTCAG	QAVVTQEPSMTVSPGGTVTLTCASSTGAVTSGHSPHWFQQKPGQAPKTLIYNTNYKHSWTPARFSGSLLGGKAALTLSGAQPEDEAEYYCWLYYSGAQ
IGLV7-88*01_kim_S4824	CAGGCTGTAGTGACTCAGGAGCCCTCACTGACTGTGTCCCCAGGAGGGACAGTCACTCTCACTTGTGGCTCCAGTGCTGGGGCAGTCACTGGGAGTCATTATCCCTACTGGTTCCAGCAGAAGCCTGGCCAAGCCCCTAGAACACTGATTTATGATACAAGCAACAAACTCTCCTGGACCCCTGCCCGGTTCTCAGGCTCCCTCCTTGGGGGTAAAGCTGCCCTAACACTGTCAAATGCGCAGCCTGAGGATGAAGCTGAGTATTACTGCTGGCTGCAGTATAGTGGTGCTCAG	QAVVTQEPSLTVSPGGTVTLTCGSSAGAVTGSHYPYWFQQKPGQAPRTLIYDTSNKLSWTPARFSGSLLGGKAALTLSNAQPEDEAEYYCWLQYSGAQ
IGLV7-88*01_kim	CAGGCTGTAGTGACTCAGGAGCCCTCACTGACTGTGTCCCCAGGAGGGACAGTCACTCTCACTTGTGGCTCCAGTGCTGGAGCAGTCACTGGGAGTCATTATCCCTACTGGTTCCAGCAGAAGCCTGGCCAAGCCCCTAGAACACTGATTTATGATACAAGCAACAAGCTCTCCTGGACCCCTGCCCGGTTCTCAGGCTCCCTCCTTGGGGGTAAAGCTGCCCTGACACTGTCAGGTGCGCAGCCTGAGGATGAAGCTGAGTATTACTGCTGGCTGCACTATAGTGGTGCTCAG	QAVVTQEPSLTVSPGGTVTLTCGSSAGAVTGSHYPYWFQQKPGQAPRTLIYDTSNKLSWTPARFSGSLLGGKAALTLSGAQPEDEAEYYCWLHYSGAQ
IGLV7-NL_1*01_S1446_kim	CAGGCTGTAGTGACTCAGGAGCCCTCACTGACTGTGTCCCCAGGAGGGACAGTCACTCTCACCTGTGGCTCCAGCACTGGAGCAGTCACCAGTGGTAACTATCCAAACTGGTTCCAGCAGAAACCTGGACAAGCCCCCAGGGGACTGATTTACAATACAAACAGCAAACACTCCTGGACCCCTGCCCGGTTCTCAGGCTCCCTCGCTGGGGGCAAAGCTGCCCTGACACTGTCAGGTGCACAGCCCGAGGACGAGGCTGAGTATTACTGCTTGCTGTACTATAGTGGTGCTCAG	QAVVTQEPSLTVSPGGTVTLTCGSSTGAVTSGNYPNWFQQKPGQAPRGLIYNTNSKHSWTPARFSGSLAGGKAALTLSGAQPEDEAEYYCLLYYSGAQ
IGLV8-125*02_S1361_kim	GAGACTGTGGTGACCCAGGAGCCATCGTTGTCAGTGTCCCCTGGAGGAACAGTCACACTCACCTGTGGCCTGAGCTCTGGCTCAGTCTCTACCAGTAACTACCCCAGCTGGTACCAGCAGACCCCAGGCCAGGCTCCACGCACGCTCATCTACAGCACAAACACTCGCCCTTCTGGGGTCCCTGATCGCTTCTCTGGCTCCATCCTTGGGAACAAAGCTGCCCTCACCATCACGGGGGCTCAGGCAGACGATGAATCTGATTATTACTGTACGCTCTACATGGGTAGTGGCATTTC	ETVVTQEPSLSVSPGGTVTLTCGLSSGSVSTSNYPSWYQQTPGQAPRTLIYSTNTRPSGVPDRFSGSILGNKAALTITGAQADDESDYYCTLYMGSGI
IGLJ1*01	TTACATCTTCGGTGCTGGGACCCGGCTCACCGTCCTAG	YIFGAGTRLTVL
IGLJ1*01_S4608	TTACATCTTCGGTACTGGGACCCGGCTCACCGTCCTAG	YIFGTGTRLTVL
IGLJ2*01	TGGCTTATTCGGAGGAGGGACCCGGCTGACCGTCCTAG	GLFGGGTRLTVL
IGLJ2*01_S9248	TGGCTTATTCGGAGGAGGGACCCGGCTGACCATCCTAG	GLFGGGTRLTIL
IGLJ2A*01	TTGGGTATTCGGCGGAGGGACCCGGCTGACCGTCCTAG	WVFGGGTRLTVL
IGLJ2A*01_S6837	TTGGGTATTCGGAGGAGGGACCCGGCTGACCGTCCTAG	WVFGGGTRLTVL
IGLJ3*01	TGTGTTATTCGGAGGAGGGACCCGGCTGACCGTCCTAG	VLFGGGTRLTVL
IGLJ3*01_S9314	TGTGTTATTTGGAGGAGGGACCCGGCTGACCGTCCTAG	VLFGGGTRLTVL
IGLJ6*01	TGATGTGTTCGGAAGTGGCACCAAGTTGACCGTCCTCG	DVFGSGTKLTVL
IGLJ6*01_S3351	TGATGTGTTCGGAGGTGGCACCAAGTTGACCGTCCTCG	DVFGGGTKLTVL
IGLJ6*01_S7841	TGATGTGTTCGGAAGTGGCACCAAGTTGACCATCCTCG	DVFGSGTKLTIL
IGLJ7*01	TGTTATGTTCGGAAGAGGCACCAGGCTGACCGACATCG	VMFGRGTRLTDI
IGLJ7*01_S8938	TGTTATGTTCGGAAGAGGCACCAGGCTGACCGTCATCG	VMFGRGTRLTVI
IGLJ7*02	TGTTATGTTGGGAAGAGGCACCAGGCTGACCGTCATCG	VMLGRGTRLTVI

## Sheet: I10_IGH
Allele	Sequence (NT)	Sequence (AA)
IGHV1-124*01	CAGGTGCAGCTGGTGCAGTCTGGGGCTGAGATTAAGCAGCCTGGGGCCTCAGTGAAGCTCTCCTGCAAGGCTTCTGGATATACCTTCACTAGCTACTACATGCACTGGGTGAGACAGGCCCCTGGACAAGGCCTTGAGTGGATAGGACTGATCTCCCCTTACAATGGTAACAAAGGCTACGCACAGAACTTCCAGGGCAGAGTCACCATAACTACGGACACGTCCACGAGCACAGGCTACATGGAGCTGAGCAGCCTGAGATCTGAGGACACAGCCGTGTATTACTGTACGAGAGA	QVQLVQSGAEIKQPGASVKLSCKASGYTFTSYYMHWVRQAPGQGLEWIGLISPYNGNKGYAQNFQGRVTITTDTSTSTGYMELSSLRSEDTAVYYCTR
IGHV1-124*01_S6748	CAGGTGCAGCTGGTGCAGTCTGGGGCTGAGATTAAGCAGCCTGGGGCCTCAGTGAAGCTCTCCTGCAAGGCTTCTGGATATACCTTCACTAGCTACTACATGCACTGGGTGAGACAGGCCCCTGGACAAGGCCTTGAGTGGATAGGACTGATCTCCCCTTACAATGGTAACAAAGGCTACGCACAGAACTTCCAGGGCAGAGTCACCATAACTACGGACACGTCCACGAGCACAGGCTACATGGAGCTGAGCAGCCTGAGATCTGAGGACACAGCCGTGTATTACTGTACAAGAGA	QVQLVQSGAEIKQPGASVKLSCKASGYTFTSYYMHWVRQAPGQGLEWIGLISPYNGNKGYAQNFQGRVTITTDTSTSTGYMELSSLRSEDTAVYYCTR
IGHV1-138*01_S6980	CAGGTCCAGCTGGTGCAGTCTGGGGCTGAGGTGAAGAAGCCTGGGGCCTCAGTGAAGGTTTCCTGCAAGGCTTCTGGATTCACCTTCGGCAGCTATGCTATCAGCTGGGTGCGACAGGCCCCTGGACAAGGGCTTGAGTGGATGGGAGGGATCGTCCCTCTTGTTGGTGTAACAAACTACGCACAGAAGTTCCAGGGCAGAGTCACGATTACCGCGGACACGTCCACAAGCACAGCCTACATGGAGCTGAGCAGCCTGAGATCTGAGGACACGGCCGTGTATTACTGTGCGAGAGG	QVQLVQSGAEVKKPGASVKVSCKASGFTFGSYAISWVRQAPGQGLEWMGGIVPLVGVTNYAQKFQGRVTITADTSTSTAYMELSSLRSEDTAVYYCAR
IGHV1-138*01_S9673	CAGGTCCAGCTGGTGCAGTCCGGGGCTGAGGTGAAGAAGCCTGGGGCCTCAGTGAAGGTTTCCTGCAAGGCTTCTGGATTCACCTTCGGCAGCTATGCTATCAGCTGGGTGCGACAGGCCCCCGGACAAGGGCTTGAGTGGATGGGAGTGATCATGCCTCTTGTTGGTGTAACAAACTACGCAGAGAAGTTCCAGGGCAGAGTCACGATTACCACGGACACGTCCACAAGCACAGCCTACATGGAGCTGAGCAGCCTGAGATCTGAGGACACGGCCGTGTATTACTGTGCGAGAGG	QVQLVQSGAEVKKPGASVKVSCKASGFTFGSYAISWVRQAPGQGLEWMGVIMPLVGVTNYAEKFQGRVTITTDTSTSTAYMELSSLRSEDTAVYYCAR
IGHV1-170*01	GAGGTCCAGCTGGTGCAGTCTGGGGCTGAAGTGAAGAAGCCTGGGGCCTCAGTGAAGGTCTCCTGCAAGGTTTCCGGATACACCTTCACCGAATTATCCATGCACTGGGTGCGACAGGCCCCTGGAAAAGGGCTTGAGTGGATGGGAGGTGTTGATCCTGTATATGGTGAAATAATACACGCAGAGAAGTTCCAGGGCAGAGTCACCATGACCGAGGACACGTCTACAGACACAGCCTACATGGAGCTGAGCAGCCTGAGATCTGAGGACACGGCCGTGTATTACTGTGCGAGAGA	EVQLVQSGAEVKKPGASVKVSCKVSGYTFTELSMHWVRQAPGKGLEWMGGVDPVYGEIIHAEKFQGRVTMTEDTSTDTAYMELSSLRSEDTAVYYCAR
IGHV1-60*01_S7772	CAGGTCCAGCTGGTGCAATCCGGGGCTGAGGTGAAGAAGCCTGGGACCTCAGTGAAGCTCTCCTGCAAAGCTTCTGGTTACACCTTTACCAGCTACTATATAAACTGGGTGAGACAGGCCCCTGGACAAGTGCTTGAGTGGATGGGATGGATTAACCCTAGCAATGGTAATACAGGCTACGCACAGAAGTTCCAGGGCAGAGTCACCATGACCAGGGACACGTCCACGAGTACAGCCTACATGGAGCTGAACAGCCTGAGATCTGAGGACACGGCCGTGTATTACTGTGCAAGAGG	QVQLVQSGAEVKKPGTSVKLSCKASGYTFTSYYINWVRQAPGQVLEWMGWINPSNGNTGYAQKFQGRVTMTRDTSTSTAYMELNSLRSEDTAVYYCAR
IGHV1-84*01_S0240	GAGGTCCAGCTGGTACAGTCTGGGGCTGAGGTGAAGAAGCCTGGGGCCTCCGTGAAAATCTCCTGCAAGGCTTCTGGATACACCTTCACCGACCACTACCTGAACTGGGTGCGACAGGCTCCTGGAAAAGGGCTTGAGTGGATGGGACGTGTTGATCCTGAAGATGGTGAAGCAGACTACGCACAGAAGTTCCAGGACAGAGTCACCATCACCGCGGACATGTCTACAGACACAGCCTACATGGAGCTGAGCAGCCTGAGATCTGAGGACACGGCCGTGTATTACTGTGCAAGAGA	EVQLVQSGAEVKKPGASVKISCKASGYTFTDHYLNWVRQAPGKGLEWMGRVDPEDGEADYAQKFQDRVTITADMSTDTAYMELSSLRSEDTAVYYCAR
IGHV1-84*01_S9171	GAGGTCCAGCTGGTACAGTCTGGGGCTGAGGTGAAGAAGCCTGGGGCCTCCGTGAAAATCTCCTGCAAGGCTTCTGGATACACCTTCACCGACTACTACCTGCACTGGGTGCGACAGGCTCCTGGAAAAGGGCTTGAGTGGATGGGACGTGTTGATCCTGAAGATGGTGAAGCAGACTACGCACAGAAGTTCCAGGACAGAGTCACCATCACCAGGGACACGTCTACAGACACAGCCTACATGGAGCTGAGCAGCCTGAGATCTGAGGACACGGCCGTGTATTACTGTGCAACAGA	EVQLVQSGAEVKKPGASVKISCKASGYTFTDYYLHWVRQAPGKGLEWMGRVDPEDGEADYAQKFQDRVTITRDTSTDTAYMELSSLRSEDTAVYYCAT
IGHV2-118*01_S3831	CAGGTGACCTTGAAGGAGTCTGGTCCTGCGCTGGTGAAACCCACACAGACCCTCACGCTGACCTGCACCTTCTCTGGGTTCTCACTCAGCACTAGTGGTATGGGTGTGGGCTGGATCCGTCAGCCCTCACGGAAGACCCTGGAGTGGCTTGCACACATTTATTGGAATGATGATAAATACTACAGCACATCGCTGAAGAGCAGGCTCACCATCTCCAAGGACACCTCCAAAAACCAGGTGGTTCTAACAATGACCAACATGGACCCTGTGGACACAGCCACATATTACTGTGCACGGAGAC	QVTLKESGPALVKPTQTLTLTCTFSGFSLSTSGMGVGWIRQPSRKTLEWLAHIYWNDDKYYSTSLKSRLTISKDTSKNQVVLTMTNMDPVDTATYYCARR
IGHV2-118*01_S4531	CAGGTGACCTTGAAGGAGTCTGGTCCTGCGCTGGTGAAACCCACACAGACCCTCACGCTGACCTGCACCTTCTCTGGGTTCTCACTCAGTACTAGTGGTATGGGTGTGGGCTGGATCCGTCAGCCCTCACGGAAGACCCTGGAGTGGCTTGCACACATTTATTGGGATGATGATAAGCGCTACAGCACATCTCTGAAGAGCAGGCTCACCATCTCCAAGGACACCTCCAAAAACCAGGTGGTTCTAACAATGACCAACATGGACCCTGTGGACACAGCCACATATTACTGTGCACGGAGAC	QVTLKESGPALVKPTQTLTLTCTFSGFSLSTSGMGVGWIRQPSRKTLEWLAHIYWDDDKRYSTSLKSRLTISKDTSKNQVVLTMTNMDPVDTATYYCARR
IGHV2-69*02_S0779	CAGGTCACCTTGAAGGAGTCTGGTCCTGCGCTCGTGAAACCCACACAGACCCTCACGCTGACCTGCACCTTCTCTGGGTTCTCAATCAGCACTACTGGAACAGGTGTGGGCTGGATCCGTCAGCCCCCAGGGAAGGCCCTGGAATGGCTTGCAAGCATTTATTGGAATGATAGTAAATACTACAGCACATCGCTGAAGAGCAGGCTCACCATCTCCAAGGACACCTCCAAGAACCAGGTGGTTCTGACAATGACCAACATGGACCCTGTGGACACAGCCACATATTACTGTGCACGGGTAC	QVTLKESGPALVKPTQTLTLTCTFSGFSISTTGTGVGWIRQPPGKALEWLASIYWNDSKYYSTSLKSRLTISKDTSKNQVVLTMTNMDPVDTATYYCARV
IGHV2-7*01_S4124	CAGGTCACCTTGAAGGAGTCTGATCCTGCGCTAGTGAAACCCACACAGACCCTCACGCTGACCTGCACCTTCTCTGGGTTCTCACTCAGCACTTCTGGAATGGGTGTGGACGGGATCCGTCAGCCCCCAGGGAAGGCCCTGGAGTGGCTTGCACGCATTGATTGGGATGATGATAAATACTACAGCCCATCGCTGAAGAGCAGGCTCACCATCTCCAAGGACACCTCCAAGAACCAGGTTGTCCTTACAATGACCAACATGGACCCTGTGGACACAGCCACATATTACTGTGCACGGGGAG	QVTLKESDPALVKPTQTLTLTCTFSGFSLSTSGMGVDGIRQPPGKALEWLARIDWDDDKYYSPSLKSRLTISKDTSKNQVVLTMTNMDPVDTATYYCARG
IGHV2-NL_1*01_S0252	CAGGTGACCTTGAAGGAGTCTGGTCCTGCGCTGGTGAAACCCACACAGACCCTCACACTGACCTGCACCTTCTCTGGGTTCTCACTCAGTACTAGTGGTATGGGTGTGGGCTGGATCCGTCAGCCCCCAGGGAAGGCCCTGGAGTGGCTGGCACTCATTTATTGGGATGATGATAAGCGCTACAGCACATCTCTGAAGAGCAGGCTCACCATCTCCAAGGACACCTCCAAGAACCAGGTTGTCCTTACAATGACCAACATGGACCCTGTGGACACAGCCACATATTACTGTGCACGGGGAC	QVTLKESGPALVKPTQTLTLTCTFSGFSLSTSGMGVGWIRQPPGKALEWLALIYWDDDKRYSTSLKSRLTISKDTSKNQVVLTMTNMDPVDTATYYCARG
IGHV2-NL_1*01_S5603	CAGGTGACCTTGAAGGAGTCTGGTCCTGCGCTGGTGAAACCCACACAGACCCTCACACTGACCTGCACCTTCTCTGGGTTCTCACTCAGTACTAGTGGTATGGGTGTGGGCTGGATCCGTCAGCCCCCAGGGAAGGCCCTGGAGTGGCTGGCACTCATTTATTGGGATGATGATAAGCGCTACAGCACATCTCTGAAGAGCAGGCTCACCATCTCCAAGGACACCTCCAAGAACCAGGTTGTCCTTACAATGACCAACATGGACCCTGTGGACACAGCCACATATTACTGTGCACGGAGAC	QVTLKESGPALVKPTQTLTLTCTFSGFSLSTSGMGVGWIRQPPGKALEWLALIYWDDDKRYSTSLKSRLTISKDTSKNQVVLTMTNMDPVDTATYYCARR
IGHV2-NL_1*01_S7874	CAGGTCACCTTGAAGGAGTCTGGTCCTGCGCTCGTGAAACCCACACAGACCCTCACGCTGACCTGCACCTTCTCTGGGTTCTCACTCACCACTAGTGGAATGGGTGTGGGCTGGATCCGTCAGCCCCCAGGGAAGGCCCTGGAGTGGCTGGCACTCATTTATTGGGATGATGATAAGCGCTACAGCACATCTCTGAAGAGCAGGCTCACCATCTCCAAGGACACCTCCAAAAACCAGGTTGTCCTTACAATGACCAACATGGACCCTGTGGACACAGCCACATATTACTGTGCACGGGGAC	QVTLKESGPALVKPTQTLTLTCTFSGFSLTTSGMGVGWIRQPPGKALEWLALIYWDDDKRYSTSLKSRLTISKDTSKNQVVLTMTNMDPVDTATYYCARG
IGHV3-100*01_S4375	CAGTGTGTGGAGCAGCTGGTGGAGTCTGGGGGAGGCTTGGTACAGCCTGGGGCGTCCCTGAGACTCTCCTGTGCAGCCTCTGAATTCACCTTCAGTAGCTATGACATGCACTGGGTTCGCCAGGCTCCAGGGAAGGGTCTGGAGTGGGTATCAGCTATTAGCATTGGCGGTGGCACATACTACCCAGACTCTGTGAAGGGTCGATTCACCATCTCCAGAGACAATGCCAAGAACTCCTTGTATCTTCAAATGAACAGCCTGAGAGCTGAGGACACTGCTGTGTATTATTGTGCAAGAGA	QCVEQLVESGGGLVQPGASLRLSCAASEFTFSSYDMHWVRQAPGKGLEWVSAISIGGGTYYPDSVKGRFTISRDNAKNSLYLQMNSLRAEDTAVYYCAR
IGHV3-119*01	GAGGTGCAGCTGGCGGAGTCTGGGGGAGGCTTGGTCCAGCCTGGAGGGTCCCTGAGACTCTCCTGTGCAGCCTCTGGATTCACCGTTAGCAGCTACTGGATGAGCTGGGTCCGCCAGGCTCCGGGAAAGGGGCTGGAGTGGCTTTCAGACATTTATGGTAGTACCATGTACTACGGAGACTCTGTGAAGGGCCGATTCACCGTCTCCAGAGACAATGCCAAGAACTCGCTGTATCTGCAAATGAACAGCCTGAGAGCCGAGGACACGGCCGTGTATTACTGTACTAGAGA	EVQLAESGGGLVQPGGSLRLSCAASGFTVSSYWMSWVRQAPGKGLEWLSDIYGSTMYYGDSVKGRFTVSRDNAKNSLYLQMNSLRAEDTAVYYCTR
IGHV3-122*01_S6138	GAGGTGCAGCTGGTGGAGTCTGGGGGCGGCTTGGCAAAGCCTGGGGGGTCCCTGAGACTCTCCTGCGCAGCCTCCGGATTCACCTTCAGTGACTACTACATGGACTGGGTTCGCCAGGCTCCAGGGAAGGGGCTGGAGTGGGTCTCACGTATTAGTAATGGTGGTGGTAGCACATGGTACGCAGACTCCGTGAAGGGCAGATTCACCATCTCCAGAGAGAACGCCAAGAACACACTGTATTTTCAAATGAACAGCCTGAGAGCTGAGGACACGGCTGTCTATTACTGTGCGAGAGA	EVQLVESGGGLAKPGGSLRLSCAASGFTFSDYYMDWVRQAPGKGLEWVSRISNGGGSTWYADSVKGRFTISRENAKNTLYFQMNSLRAEDTAVYYCAR
IGHV3-122*01_S8388	GAGGTGCAGCTGGTGGAGTCTGGGGGCGGCTTGGCAAAGCCTGGGGGGTCCCTGAGACTCTCCTGCGCAGCCTCCGGATTCACCTTCAGTGACTACTACATGGACTGGGTCCGCCAGGCTCCAGGGAAGGGGCTGGAGTGGGTCTCACGTATTAGTAATGGTGGTGGTAGCACATGGTACGCAGACTCCGTGAAGGGCAGATTCACCATCTCCAGAGAGAACGCCAAGAACACACTGTATCTTCAAATGAACAGCCTGAGAGCTGAGGACACGGCTGTCTATTACTGTGCGAGAGA	EVQLVESGGGLAKPGGSLRLSCAASGFTFSDYYMDWVRQAPGKGLEWVSRISNGGGSTWYADSVKGRFTISRENAKNTLYLQMNSLRAEDTAVYYCAR
IGHV3-127*01_S3041	GAGGTGCAGCTGGTGGAGTCTGGGGGAGGCTTGGTCCAGCCTGGGGGATCCCTGAGACTCTCCTGTGCAGCCTCTGGATTCACCTTTGGTGATTATGGCATGCACTGGGTCCGCCAGGCTCCGGGAAAGGGACTGGAGTGGGTCTCATCCATTAGTTACACTGGTAAAACCGTATACTACGCTGACTCCGTGAAGGGCCGATTCACCGTCTCCAGAGACAACGCCAAGAACTCGCTGTCTCTGCAAATGAGCAGCCTGAGAGCCGAGGACACGGCCGTGTATTACTGTACTAGAGA	EVQLVESGGGLVQPGGSLRLSCAASGFTFGDYGMHWVRQAPGKGLEWVSSISYTGKTVYYADSVKGRFTVSRDNAKNSLSLQMSSLRAEDTAVYYCTR
IGHV3-127*01_S5171	GAGGTGCAGCTGGTGGAGTCTGGGGGAGGCTTGGTCCAGCCTGGGGGGTCCCTGAGACTCTCCTGTGCAGCCTCTGGATTCACCTTTGGTGATTATGGCATGCACTGGGTCCGCCAGGCTCCGGGAAAGGGACTGGAGTGGGTCTCATCCATTAGTTACACTGGTAAAACCGTATACTACGCTGACTCCGTGAAGGGCCGATTCACCGTCTCCAGAGACAACGCCAAGAACTCGCTGTCTCTGCAAATGAGCAGCCTGAGAGCCGAGGACACGGCCGTGTATTACTGTACTAGAGA	EVQLVESGGGLVQPGGSLRLSCAASGFTFGDYGMHWVRQAPGKGLEWVSSISYTGKTVYYADSVKGRFTVSRDNAKNSLSLQMSSLRAEDTAVYYCTR
IGHV3-128*02_S0204	GAGGTGCAGCTGGTGGAGTCTGGGGGAGGCTTGGTCCAGCCTGGGGGGTCCCTGAGACTCTCCTGTGCAGCCTCTGGATTCACCTTCAGTAACCACTACATGTACTGGGTCCGCCAGGCTCCAGGAAAGGGGCTGGAGTGGGTGGGTTTCATTAGAAGCAAAGCTTACGGTGGGACAGCAGAATACGCCGCGTCTGTGAAAGGCAGATTCACCATCTCCAGAGATGATTCCAAAAGCATCGCCTATCTGCAAATGAACAGCCTGAAAACCGAGGACACGGCCGTGTATTACTGTACTAGGGA	EVQLVESGGGLVQPGGSLRLSCAASGFTFSNHYMYWVRQAPGKGLEWVGFIRSKAYGGTAEYAASVKGRFTISRDDSKSIAYLQMNSLKTEDTAVYYCTR
IGHV3-141*01_S2525	GAAGTGCAGCTGGTGGAGTCTGGGGGAGGCGTGGTACAGCCTGGGGGGTCCCTGAGACTCTCCTGTGTAGCCTCTGGATTCACCTTTGATGATTATGCCATGCACTGGGTCCGCCAAGCTCCAGGGAAGGGTCTGGAGTGGGTCTCTGGTATTAGTTGGAGTGGTGATAGCACATACTATGCAGACTCCGTGAAGGGCCGATTCACCATCTCCAGAGACAACGCCAAGAACTCCCTGTATCTGCAAATGGACAGCCTGAGAGCTGAGGACACCGCCTTGTATTACTGTGCGAGAGA	EVQLVESGGGVVQPGGSLRLSCVASGFTFDDYAMHWVRQAPGKGLEWVSGISWSGDSTYYADSVKGRFTISRDNAKNSLYLQMDSLRAEDTALYYCAR
IGHV3-141*02_S4366	GAAGTGCAGCTGGTGGAGTCTGGGGGAGGCGTGGTACAGCCTGGGGGGTCCCTGAGACTCTCGTGTGCAGCCTCTGGATTCACCTTTGATGATTATGCCATGGGCTGGGTCCGCCAAGCTCCAGGGAAGGGTCTGGAGTGGGTCTCTGCTATTAGTTGGAATGGTGGTAGCACAGGCTATGCAGACTCCGTGAAGGGCCGATTCACCATCTCCAGAGACAACGCCAAGAACTCCCTGTATCTGCAAATGGGCAGCCTGAGAGCTGAGGACACCGCCTTGTATTACTGTGCGAGAGA	EVQLVESGGGVVQPGGSLRLSCAASGFTFDDYAMGWVRQAPGKGLEWVSAISWNGGSTGYADSVKGRFTISRDNAKNSLYLQMGSLRAEDTALYYCAR
IGHV3-143*01	GAGGTGCAACTGGTGGAGTCTGGGGGAGGCTTGGTACAGCCTGGCGGGTCCCTGAGACTGTCCTGTGCAGCCTCTGGATTCACCTTCAGTAGCTATGCTATGCAGTGGGTTCACCAGGCTCCAGGGAAGGGTCTGGAGTGGGTATCAGCTATTGGTCCTGGTGGTGACACATACTATGCAGACGCCGTGAAGGGCAGATTCACCATCTCCAGAGACAACGCCAAGAACTCCTTGTATCTTCAAATGAACAGCCTGAGAGCCGAGGACACGGCTGTGTATTACTGTGCGAGAGA	EVQLVESGGGLVQPGGSLRLSCAASGFTFSSYAMQWVHQAPGKGLEWVSAIGPGGDTYYADAVKGRFTISRDNAKNSLYLQMNSLRAEDTAVYYCAR
IGHV3-143*01	GAGGTGCAACTGGTGGAGTCTGGGGGAGGCTTGGTACAGCCTGGCGGGTCCCTGAGACTGTCCTGTGCAGCCTCTGGATTCACCTTCAGTAGCTATGCTATGCAGTGGGTTCACCAGGCTCCAGGGAAGGGTCTGGAGTGGGTATCAGCTATTGGTCCTGGTGGTGACACATACTATGCAGACGCCGTGAAGGGCAGATTCACCATCTCCAGAGACAACGCCAAGAACTCCTTGTATCTTCAAATGAACAGCCTGAGAGCCGAGGACACGGCTGTGTATTACTGTGCGAGAGA	EVQLVESGGGLVQPGGSLRLSCAASGFTFSSYAMQWVHQAPGKGLEWVSAIGPGGDTYYADAVKGRFTISRDNAKNSLYLQMNSLRAEDTAVYYCAR
IGHV3-172*01_S8824	GAGGTGCAGCTGGTGGAGTCCGGGGGAGGCTTGGTCCAGCCTGGCGGGTCCCTGAGACTCTCCTGTGCAGCCTCTGGATTCACCTTCAGTGATTATGCTATGGACTGGGTCCGCCAGGCTCCAGGAAAGGGGCCGGAGTGGGTAGGTTTCATTAGAAGCAAAGCTTATGGTGGGACAGCAGAATACGCCGCGTCTGTGAAAGGCAGATTCACCATCTCCAGAGATGATTCAAAGAACACGGCGTATCTGCAAATGAGCAGCCTGAAAACCGAGGACACGGCCGTGTATTACTGTACTAGAGA	EVQLVESGGGLVQPGGSLRLSCAASGFTFSDYAMDWVRQAPGKGPEWVGFIRSKAYGGTAEYAASVKGRFTISRDDSKNTAYLQMSSLKTEDTAVYYCTR
IGHV3-187*01_S6840	GAGGTGCAGCTGGTGGAGTCTGGGGGAGGCTTGGTCCAGCCTGGCGGGTCCCTGAGACTCTCCTGTGCAGCCTCTGGATTCACCTTCAGTAACTACTGGATGAGCTGGGTCCGCCAGGCTCCAGGGAAGGGGCTGGACTGGGTTGGCCGTATTAAAAACAAAGCTGATGGTGGAACAGCAGCATACGCCGAATCTGTGAAAGGCAGATTCACTATCTCAAGAGATGATTCAAAGAACACACTGTATCTGCAAATGAACAGCCTGAAAACCGAGGACACGGCCGTGTATTACTGTACTAGAGA	EVQLVESGGGLVQPGGSLRLSCAASGFTFSNYWMSWVRQAPGKGLDWVGRIKNKADGGTAAYAESVKGRFTISRDDSKNTLYLQMNSLKTEDTAVYYCTR
IGHV3-187*01_S8972	GAGGTGCAGCTGGTGGAGTCTGGGGGAGGCTTGGTCCAGCCTGGGGGTTCCCTGAGACTCTCCTGTGCAGCCTCCGGATTCACCTTCAGTAACTACTGGATGAGCTGGGTCCGCCAGGCTCCAGGGAAGGGGCTGGAGTGGGTTGGATTTATTAAAAACAAAGCCGATGGTGGAACAGCAGCATACGCCGAATCTGTGAAAGGCAGATTCACTATCTCAAGAGATGATTCAAAGAACACACTGTACCTGCAAATGAACAGCCTGAAAACCGAGGACACGGCCGTGTATTACTGTGCTAGAGA	EVQLVESGGGLVQPGGSLRLSCAASGFTFSNYWMSWVRQAPGKGLEWVGFIKNKADGGTAAYAESVKGRFTISRDDSKNTLYLQMNSLKTEDTAVYYCAR
IGHV3-28*01_S4621	GAGGTGCAGCTGGTGGAGTCTGGGGGCGGCTTGGCAAAGCCTGGGGGGTCCCTGAGACTCTCCTGTGCAGCCTCTGGATTCACCTTCAGTAGCTACTGGATGCACTGGGTTCGCCAGGCACTAGGGAAGGGGCTGGAGTGGATCTCAGCTATTAATAGTGCTGGTAGTAGCACATACTATGCAGACTCCGTGAAGGGCAGATTCACCATCTCCAGAGAGAACGCCAAGAACACACTGTATCTTCAAATGGACAGCCTGAGAGCCGAGGACACGGCTGTCTATTACTGTGCGAGAGA	EVQLVESGGGLAKPGGSLRLSCAASGFTFSSYWMHWVRQALGKGLEWISAINSAGSSTYYADSVKGRFTISRENAKNTLYLQMDSLRAEDTAVYYCAR
IGHV3-28*01_S7540	GAGGTGCAGCTGGTGGAGTCTGGGGGCGGCTTGGCAAAGCCTGGGGGGTCCCTGAGACTCTCCTGTGCAGCCTCTGGATTCACCTTCAGTAGCTACTGGATGCACTGGGTTCGCCAGGCACCAGGGAAGGGGCTGGAGTGGATCTCAGCTATTAATAGTGCTGGTAGTAGCACATACTATGCAGACTCCGTGAAGGGCAGATTCACCATCTCCAGAGAGAACGCCAAGAACACACTGTATCTTCAAATGGACGGCCTGAGAGCTGAGGACACGGCTGTCTATTACTGTGCGGGAGA	EVQLVESGGGLAKPGGSLRLSCAASGFTFSSYWMHWVRQAPGKGLEWISAINSAGSSTYYADSVKGRFTISRENAKNTLYLQMDGLRAEDTAVYYCAG
IGHV3-37*01_S5603	GAGGTGCAGCTGGTGGAGTCTGGGGGCGGCTTGGCACAGCCTGGGGGGTCCCTGAGACTCTCCTGTGCAGCCTCTGGATTCACCTTCAGTGACCACTACATGGATTGGGTCCGCCAGGCTCCAGGGAAGGGCCTGGAGTGGGTTGGCCGTATTAGAAACAAAGCTAACAGTTACCCGACAGAATACGCCGCGTCTGTGAAAGGCAGATTCACCATCTCAAGGGATGATTCAAAGAACACACTGTATCTGCAAATGAGCAGCCTGAAAACCGAGGACACGGCCGTGTATTACTGTGCTAGAGA	EVQLVESGGGLAQPGGSLRLSCAASGFTFSDHYMDWVRQAPGKGLEWVGRIRNKANSYPTEYAASVKGRFTISRDDSKNTLYLQMSSLKTEDTAVYYCAR
IGHV3-5*01	GAGGTGCAGTTGGTGGAGTCTGGGGGAGGCTTGGTACAGCCTGGGGGCTCCCTGAGACTCTCTTGTACAGGCTCTGGATTCACCTTCAGTAGCTACTACATGTACTGGGTCCGCCAGGCTCCAGGGAAGGGGCTGGAGTGGGTCTCAGCTATTAATACTGGTGGGGGTAGCACATGGTACACAGACTCCGTGAAGGGCCGATTCACCATCTCCAAAGAGAACGCCAAGAACACACTGTATCTTCAAATGGACAGCCTGAGAGCTGAGGACACGGCTGTCTATTACTGTGCGAAAGACA	EVQLVESGGGLVQPGGSLRLSCTGSGFTFSSYYMYWVRQAPGKGLEWVSAINTGGGSTWYTDSVKGRFTISKENAKNTLYLQMDSLRAEDTAVYYCAKD
IGHV3-50*01	GAGGTGCAGCTGGTGGAGTCTGGAGGAGGCTTGGTTCAGCCTGGGGGGTCCCTGAGACTCTCCTGTGCAGCCTCTGGATTCACCTTCAGTAGCTATGGCATGCACTGGGTCCGCCAGGCTCCAGGGAAGGGGCTGGAGTGGGTGGCAGTTATATCGTATGATGGAAGTAAGAAATACTACGCAGACTCTGTGAAGGACCGATTCACCATCTCCAGAGACAATTCCAAGAACATGCTATATCTTCAAATGAACAACCTGAAATTGGAGGACACGGCCGTGTATTACTGTGCGAGAGA	EVQLVESGGGLVQPGGSLRLSCAASGFTFSSYGMHWVRQAPGKGLEWVAVISYDGSKKYYADSVKDRFTISRDNSKNMLYLQMNNLKLEDTAVYYCAR
IGHV3-50*01_S1879	GAGGTGCAGCTGGTGGAGTCTGGAGGAGGCTTGGTTCAGCCTGGGGGGTCCCTGAGACTCTCCTGTGCAGCCTCTGGATTCACCTTCAGTAGCTATGGCATGCACTGGGTCCGCCAGGCTCCAGGGAAGGGGCTGGAGTGGGTGGCAGTTATATGGTATGATGGAAGTAAGAAATACTACGCAGACTCTGTGAAGGACCGATTCACCATCTCCAGAGACAATTCCAAGAACATGCTATATCTTCAAATGAACAACCTGAAATTGGAGGACACGGCCGTGTATTACTGTGCGAGAGA	EVQLVESGGGLVQPGGSLRLSCAASGFTFSSYGMHWVRQAPGKGLEWVAVIWYDGSKKYYADSVKDRFTISRDNSKNMLYLQMNNLKLEDTAVYYCAR
IGHV3-53*01_S3002	GAGGTGCAGCTGGTGGAGTCTGGGGGAGGCTTGGCAAAGCCTGGGGGGTCCCTGAGACTCTCCTGCGCAGCCTCCGGATTCACCTTCAGTGACTACTACATGGACTGGGTCCGCCAGGCTTCAGGGAAGGGGCTGGAGTGGGTCTCACGTATTAGTAATGGTGGTGGTCGCACATGGTACGCAGACTCCGTGAAGGGCAGATTCACCATCTCCAGAGAGAACGCCAAGAACACACTGTATCTTCAAATGGACGGCCTGAGAGCTGAGGACACGGCTGTCTATTACTGTGCGAGAGA	EVQLVESGGGLAKPGGSLRLSCAASGFTFSDYYMDWVRQASGKGLEWVSRISNGGGRTWYADSVKGRFTISRENAKNTLYLQMDGLRAEDTAVYYCAR
IGHV3-53*01_S9106	GAGGTGCAGCTGGTGGAGTCTGGGGGCAGCTTGGCAAAGCCTGGGGGGGCCCTGAGACTCTCCTGCGCAGCCTCTGGATTCACCTTCAGTGACTACTACATGCACTGGGTCCGCCAGGCTTCAGGGAAGGGGCTGGAGTGGGTCTCAAGTATTAGTAATGGTGGTGGTAGCACATGGTACGCTGACTCTGTGAAGGGCAGATTCACCATCTCCAGAGAGAACGCCAAGAACACACTGTATCTTCAAATGAACAGCCTGAGAGCTGAGGACACGGCTGTCTATTACTGTGCGAGAGA	EVQLVESGGSLAKPGGALRLSCAASGFTFSDYYMHWVRQASGKGLEWVSSISNGGGSTWYADSVKGRFTISRENAKNTLYLQMNSLRAEDTAVYYCAR
IGHV3-73*02	GAGGTGCAGCTGGTGGAGTCTGGGGGAGGCTTGGTAAAGCCTGGGGGGTCCCTGAGACTCTCTTGTGTAGCCTCTGGGTTCACCTTCAGTAGCTATGTTATGCACTGGGTCCGCCAGGCTCCAGGAAAGGGTCTGGAGTGGGTCTCAGTTATTAGTGAAAGTGGTGGTACCACATACTACGCAGACTCTGTGAAGGGCCGATTCACCATCTCCAGAGACAACGCCAAGAACTCACTGTTTCTGCAAATGAACAGCCTGAGAGCCGAGGACACGGCCGTGTATTACTGTACTAGAGA	EVQLVESGGGLVKPGGSLRLSCVASGFTFSSYVMHWVRQAPGKGLEWVSVISESGGTTYYADSVKGRFTISRDNAKNSLFLQMNSLRAEDTAVYYCTR
IGHV3-73*02_S7884	GAGGTGCAGCTGGTGGAGTCTGGGGGAGGCTTGGTAAAGCCTGGGGGGTCCCTGAGACTCTCTTGTGTAGCCTCTGGGTTCACCTTCAGTAGCTATGTTATGCACTGGGTCCGCCAGGCTCCAGGAAAGGGGCTGGAGTGGGTCTCAGTTATTAGTGAAAGTGGTGGTACCATATACTACGCAGACTCTGTGAAGGGCCGATTCACCATCTCCAGAGACAACGCCAAGAACTCACTGTTTCTGCAAATGAACAGCCTGAGAGCCGAGGACACGGCCGTGTATTACTGTACTAGAGA	EVQLVESGGGLVKPGGSLRLSCVASGFTFSSYVMHWVRQAPGKGLEWVSVISESGGTIYYADSVKGRFTISRDNAKNSLFLQMNSLRAEDTAVYYCTR
IGHV3-76*01	GAGGTGCAGCTGGTGGAGTCTGGGGGCGGCTTGGCAAAGCCTGGGGGGTCCCTGAGACTCTCCTGTGCAGCCTCTGGATTCACCTTCAGTAGCTACTGGATGAATTGGGTCCGCCAGACTCCAGGGAAGGGGCTGGAGTGGATCTCAGCTATTAATAGTGGTGGGGGTAGCACATACTACGCAGACTCCGTGAAGGGCCGATTCACCATCTCCAGAGACAACTCAAAGAACACGCTCTCCCTGCAAATGAACAGCCTGAGAGCTGAGGACACGGCCGTGTATTACTGTGCTAAAGA	EVQLVESGGGLAKPGGSLRLSCAASGFTFSSYWMNWVRQTPGKGLEWISAINSGGGSTYYADSVKGRFTISRDNSKNTLSLQMNSLRAEDTAVYYCAK
IGHV3-76*02_S4190	GAGGTGCAGCTGGTGGAGTCTGGGGGCGGCTTGGCAAAGCCTGGGGGATCCCTGAGACTCTCCTGTGCAGCCTCTGGATTCACCTTCAGTAGCTATGCTATGCACTGGGTCCGCCAGGCTCCAGGGAAGGGGCTGGAGTGGGTCTCAGCTATTAGTAGTGGTGGTAGCACATACTACGCAGACTCCGTGAAGGGCCGATTCACCATCTCCAGAGACAACTCAAAGAACACGCTCTCCCTGCAAATGAACAGCCTGAGAGCTGAGGACACGGCCGTGTATTACTGTGCGAAAGA	EVQLVESGGGLAKPGGSLRLSCAASGFTFSSYAMHWVRQAPGKGLEWVSAISSGGSTYYADSVKGRFTISRDNSKNTLSLQMNSLRAEDTAVYYCAK
IGHV3-83*02	GAAGTGCAGTTGGTGGAGTCTGGGGGAGGCTTGGTACAGCCTGGGGGGTCCCTGAGACTCTCCTGTGTAGCCTCTGGATTCAGCTTCAGTGACCACTACATGGACTGGGTCCGCCAGGCTCCAGGGAAGGGGCTGGAGTGGGTCTCAAGTATTAGCACTGGTAGCGGTAGTACCACATTGTACCCAGACTCTGTCAAGGGCCGATTCACCATCTCCAGAGACAACGCCAAGAACACACTGTATCTGCAAATGAACAGCCTGAGAGCCGAGGACACGGCTGTCTATTACTGTGCGAGACA	EVQLVESGGGLVQPGGSLRLSCVASGFSFSDHYMDWVRQAPGKGLEWVSSISTGSGSTTLYPDSVKGRFTISRDNAKNTLYLQMNSLRAEDTAVYYCAR
IGHV3-83*02_S9518	GAAGTGCAGTTGGTGGAGTCTGGGGGAGGCTTGGTACAGCCTGGGGGGTCCCTGAGACTCTCCTGTGTAGCCTCTGGATTCACCTTCAGTGACCACTACATGGACTGGGTCCGCCAGGCTCCAGGGAAGGGGCTGGAGTGGGTCTCAAGTATTAGCACTGGTAGCGGTAGTACCACATTGTACCCAGACTCTGTCAAGGGCCGATTCATCATCTCCAGAGACAACGCCAAGAACACACTGTATCTGCAAATGAACAGCCTGAGAGCCGAGGACACGGCTGTCTATTACTGTGCGAGACA	EVQLVESGGGLVQPGGSLRLSCVASGFTFSDHYMDWVRQAPGKGLEWVSSISTGSGSTTLYPDSVKGRFIISRDNAKNTLYLQMNSLRAEDTAVYYCAR
IGHV3-88*02_S7302	GAGGTGCAGCTGGTGGAGTCTGGAGGAGGCTTGGTCCAGCCTGGCGGGTCCCTGAGAGTCTCCTGTGCAGCCTCTGGATTCACCTTCAGTGACTACTACATGCAGTGGGTCCGCCAGGCTCCAGGAAAGGGGCCGGAGTGGGTGGGTTTCCTTAGAAACAAAGCTAATGGTGGGACAGCAGAATACGCCGCGTCTGTGAAAGGCAGATTCACCATCTCCAGAGATGATTCCAAAAGCATCGCCTATCTGCAAATGAACAGCCTGAAAACCGAGGACACGGCCGTGTATTACTGTGCTAGAGA	EVQLVESGGGLVQPGGSLRVSCAASGFTFSDYYMQWVRQAPGKGPEWVGFLRNKANGGTAEYAASVKGRFTISRDDSKSIAYLQMNSLKTEDTAVYYCAR
IGHV3-9*01_S8777	GAGGTGCAGCTGGTGGAGTCTGGGGGAGGCTTGGTGCAGCCTGGGGGGTCCCTGAGACTCTCCTGTGCAGCCTCTGGATTCACCTTCAGTAACTACTACATGCACTGGGTCCGCCAGGCTCAAGGGAAAGGGCTAGAGTGGGTAGGTTTAATAAAAAACAAAGCTAACAGTTACACGACAGAATATGCTGCGGCTGTGAAAGGCAGATTCACCATCTCAAGAGATGATTCAAAGAACACGCTGTATCTGCAAATGAGCAGCCTGAAAACCGAGGACACAGCCCTGTATTACTGTACTAAA	EVQLVESGGGLVQPGGSLRLSCAASGFTFSNYYMHWVRQAQGKGLEWVGLIKNKANSYTTEYAAAVKGRFTISRDDSKNTLYLQMSSLKTEDTALYYCTK
IGHV3-94*01_S5120	GAGGTGCAGCTGGTGGAGTCTGGGGGCGGCTTGGCAAAGCCTGGGGGGTCCCTGAGACTCTCCTGCGCAGCCTCTGGATTCAGCTTCAGTGACTACTACATGTACTGGGTCCGCCAGGCTCCAGGGAAGGGGCTGGAGTGGGTCTCAGGTATTAGTTATACTGGTGGTAGCACATACTATGCAGACTCCGTGAAGGGCAGATTCACCATCTCCAGAGAGAACGCCAAGAACACACTGTATCTTCAAATGGACAGCCTGAGAGCTGAGGACACGGCTGTCTATTACTGTGCGAGAGA	EVQLVESGGGLAKPGGSLRLSCAASGFSFSDYYMYWVRQAPGKGLEWVSGISYTGGSTYYADSVKGRFTISRENAKNTLYLQMDSLRAEDTAVYYCAR
IGHV3-NL_1*01_S1379	GAGGTGCAGCTGGTGGAGTCTGGGGGAGGCTTGTTCCAGCCTGGAGGGTCCCTGAGACTCTCCTGTGCAGCCTCTGGATTCACCTTCAGTAGTTACGGCATGAGCTGGGTCCGCCAGGCTCCGGGAAAGGGGTTGGAGTGGGTCTCATTCATTAGTTACACTGGTAAAACCATATACTACGCTGACTCCGTGAAGGGCCGATTCACCATCTCCAGAGACAACGCCAAGAACTCGCTGTCTCTGCAAATGAACAGCCTGAGAGCCGAGGACACGGCCGTGTATTACTGTACTAGGGA	EVQLVESGGGLFQPGGSLRLSCAASGFTFSSYGMSWVRQAPGKGLEWVSFISYTGKTIYYADSVKGRFTISRDNAKNSLSLQMNSLRAEDTAVYYCTR
IGHV3-NL_1*01_S9854	GAGGTGCAGCTGGTGGAGTCTGGGGGAGGCTTGGTCCAGCCTGGAGGGTCCCTGAGACTCTCCTGTGCAGCCTCTGGATTCACCTTCAGTAGTTACGGCATGAGCTGGGTCCGCCAGGCTCCGGGAAAGGGGCTGGAGTGGGTCTCATCCATTAGTAGTGCTAGTAGTTACATATACTACGCTGACTCCGTGAAGGGCCGATTCACCATCTCCAGAGACAACGCCAAGAACTCGCTGTCTCTGCAAATGAACAGCCTGAGAGCCGAGGACACGGCCGTGTATTACTGTACTAGTGA	EVQLVESGGGLVQPGGSLRLSCAASGFTFSSYGMSWVRQAPGKGLEWVSSISSASSYIYYADSVKGRFTISRDNAKNSLSLQMNSLRAEDTAVYYCTS
IGHV3-NL_11*01_S3736	GAGGTGCAGCTGGTGGAGACTGGAGGAGGCTTGGTCCAGCCTGGGGGGTCCCTGAAACTCTCCTGTGCAGCCTCTGGATTCACCTTCAGTAGCTATGGCATGAGCTGGGTCCGCCAGGCTCCAGGGAAGGGGCTAGAGTGGGTCTCAGCTATTAATAGTGGTGGGGGTAGCACATACTACGCAGACTCCGTGAAGGGCCGATTCACCATCTCCAGAGACAACTCAAAGAACACGCTCTCCCTGCAAATGAACAGCCTGAGAGCTGAGGACACGGCCGTGTATTACTGTGCGAAAGA	EVQLVETGGGLVQPGGSLKLSCAASGFTFSSYGMSWVRQAPGKGLEWVSAINSGGGSTYYADSVKGRFTISRDNSKNTLSLQMNSLRAEDTAVYYCAK
IGHV3-NL_14*01_S9303	GAAGTGCAGCTGGTGGAGTCTGGGGGAGCCTTGGCACAGCCTGGCGGGTCCCTGAGACTCTCCTGTGCAGCCTCTGGATTCACGTTTGATGATTATGCCATGCACTGGGTCCGCCAAGCTCCAGGGAAGGGTCTGGAGTGGGTATCTCGGATTAGTTGGAATAGTGGTACCATATACTACGCAGACTCTGTGAAGGGCCGATTCACCATCTCCAGAGACAACGCCAAGAACTCCCTGTTTCTGCAAATGGACAGGCTGAGAGCTGAGGACACGGCCGTGTATTACTGTACTAGAGA	EVQLVESGGALAQPGGSLRLSCAASGFTFDDYAMHWVRQAPGKGLEWVSRISWNSGTIYYADSVKGRFTISRDNAKNSLFLQMDRLRAEDTAVYYCTR
IGHV3-NL_16*01_S5133	GAGGTGCAGCTGGTGGAGTCTGGGGGAGGCTTGGTACAGCCTGGCGGGTCCCTGAGACTCTCCTGTGCAGCCTCTGGATTCACCTTCAGTAGCACCAGGATGAACTGGATCCGACAGGCTCCAGGGAAGAGGCTGGAGTGGGTGGCCGACATAAAGTATGATGGAAGTGAGAAATACTATGTAGACTCTGTGAAGGGCCGATTCACCATCTCCAGAGACAATGCCAAGAACTCCCTCTATCTGCAAATGAACAGCCTGAGAGCTGAGGACACAGCCGTGTATTACTGTGTGAGAGA	EVQLVESGGGLVQPGGSLRLSCAASGFTFSSTRMNWIRQAPGKRLEWVADIKYDGSEKYYVDSVKGRFTISRDNAKNSLYLQMNSLRAEDTAVYYCVR
IGHV3-NL_17*01_S2554	GAGGTGCAGCTGGTGGAGTCTGGGGGAGGCTTGGTCCAGCCTGGGGGGTCCCTGAGGCTCTCCTGTGCAGCCTCTGGATTCACCTTCAGTAACTCCTGGATGAGCTGGGTCCGCCAGGCTCCAGGGAAGGGGCTAGAGTGGGTTGCCCGTATTAAAAGCAAAGCTGATGGTGGAACAGCAGATTACGCCGCGTCAGTGAAAGGCAGATTCACCATCTCAAGAGACGATTCAAAGAACACACTGTATCTGCAAATGAACAGCCTGAAAACCGAGGACACGGCCGTGTATTACTGCACCACAGA	EVQLVESGGGLVQPGGSLRLSCAASGFTFSNSWMSWVRQAPGKGLEWVARIKSKADGGTADYAASVKGRFTISRDDSKNTLYLQMNSLKTEDTAVYYCTT
IGHV3-NL_17*01_S3909	GAGGTGCAGCTGGTGGAGTCTGGGGCAGGCTTGGTCCAGCCTGGTGGGTCCCTGAGACTCTCCTGTGCAGCCTCTGGATTCACCTTCAGTAACTCCTGGATGAGCTGGGTCCGCCAGGCTCCAGGGAAGGGGCTAGAGTGGGTTGCCCGTATTAAAAGGAAAGCTGATGGTGAGACAGCAGATTACGCCGCATCTGTGAAAGGCAGATTCACCATCTCAAGAGACGATTCAAAGAACACACTGTACCTGCAAATGAACAGCCTGAAAACCGAGGACACGGCCGTGTATTACTGCACCACAGA	EVQLVESGAGLVQPGGSLRLSCAASGFTFSNSWMSWVRQAPGKGLEWVARIKRKADGETADYAASVKGRFTISRDDSKNTLYLQMNSLKTEDTAVYYCTT
IGHV3-NL_18*01_S0984	GAGGTGCAGCTGGTGGAGTCTGGGGGAGGCTTGGTCCAGCCTGGCGGGTCCCTGAGACTCTCCTGTGCAGCCTCTGGATTCACCTTCAGTAGTTCTGCTATGCACTGGGTCCGCCAGGCTTCTGGGAAAGGACTGGAGTGGGTTGGACGTATTAGAAGCAAATCTAACAATTACGAGACAGGATACGCTGCGTCGGTGAAAGGCAGGTTCACCATCTCCAGAGATGATTCAAAGAACACGGCGTATCTGCAAATGAACAGCCTGAAAACCGAGGACACGGCCGTGTATTACTGTGCTAGAGA	EVQLVESGGGLVQPGGSLRLSCAASGFTFSSSAMHWVRQASGKGLEWVGRIRSKSNNYETGYAASVKGRFTISRDDSKNTAYLQMNSLKTEDTAVYYCAR
IGHV3-NL_18*01_S7053	GAGGTGCAGCTGGTGGAGTCTGGGGGAGGCTTGGTCCAGCCTGGCGGGTCCCTGAGACTCTCCTGTGCAGCCTCTGGATTCACCTTCAGTAGTTCTGCTATGCACTGGGTCCGCCAGGCTTCTGGGAAAGGACTGGAGTGGGTTGGACGTATTAGAAGCAAATCTAACAATTACGAGACAGAATACGCTGCGTCGGTGAAAGGCAGGTTCACCATCTCCAGAGATGATTCAAAGAACACGGCGTATCTGCAAATGAACAGCCTGAAAACCGAGGACACGGCCGTGTATTACTGTGCTAGAGA	EVQLVESGGGLVQPGGSLRLSCAASGFTFSSSAMHWVRQASGKGLEWVGRIRSKSNNYETEYAASVKGRFTISRDDSKNTAYLQMNSLKTEDTAVYYCAR
IGHV4-117*01	CAGCTGCAGCTGCAGGAGTCGGGCCCAGGACTGGTGAAGCCTTCGGAGACCCTGTCCCTCACCTGCGCTGTCTCTGGTGGCTCCATCAGCAGTAACTACTGGAGCTGGATCCGCCAGCCCCCAGGGAAGGGACTGGAGTGGATTGGACGTATCTCTGGTAGTGGTGGGAGCACCGACTACAACCCCTCCCTCAAGAGTCGAGTCACCATTTCAACAGACACGTCCAAGAACCAGTTCTCCCTGAAGCTGAGCTCTGTGACCGCCGCGGACACGGCCGTGTATTACTGTGCGAGAGA	QLQLQESGPGLVKPSETLSLTCAVSGGSISSNYWSWIRQPPGKGLEWIGRISGSGGSTDYNPSLKSRVTISTDTSKNQFSLKLSSVTAADTAVYYCAR
IGHV4-117*01_S0312	CAGGTGCAGCTGCAGGAGTCGGGCCCAGGACTGGTGAAGCCTTCGGAGACCCTGTCCCTCACCTGCGCTGTCTCTGGTGGCTCCATCAGCAGTAACTACTGGAGCTGGATCCGCCAGCCCCCAGGGAAGGGACTGGAGTGGATTGGACGTATCTCTGGTAGTGGTGGGAGCACCGACTACAACCCCTCCCTCAAGAGTCGAGTCACCATTTCAACAGACACGTCCAAGAACCAGTTCTCCCTGAAGCTGAGCTCTGTGACCGCCGCGGACACGGCCGTGTATTACTGTGCGAGAGA	QVQLQESGPGLVKPSETLSLTCAVSGGSISSNYWSWIRQPPGKGLEWIGRISGSGGSTDYNPSLKSRVTISTDTSKNQFSLKLSSVTAADTAVYYCAR
IGHV4-117*01_S3378	CAGCTGCAGCTGCAGGAGTCGGGCCCAGGACTGGTGAAGCCTTCAGAGACCCTGTCCCTCACCTGCGCTGTCTCTGGTGGCTCTATCAGCAGTTACTGGTGGGGCTGGATCCGCCAGCCCCCAGGGAAGGGACTGGAGTGGATTGGACGTATCTCTGGTAGTAGTGGGAGCACCAGCTACAACCCCTCCCTCAAGAGTCGAGTCACCATTTCAACAGACACGTCCAAGAACCAGTTCTCCCTGAAGCTGAGCTCTGTGACCGCCGCGGACACGGCCGTGTATTACTGTGCGAGAGA	QLQLQESGPGLVKPSETLSLTCAVSGGSISSYWWGWIRQPPGKGLEWIGRISGSSGSTSYNPSLKSRVTISTDTSKNQFSLKLSSVTAADTAVYYCAR
IGHV4-149*01_S1166	CAGGTGCAGCTGCAGGAGTCGGGCCCAGGACTGGTGAAGCCTTCGGAGACCCTGTCTGTCACCTGCACTGTCTCTGGTGCCTCCATCAGTAGTTACTGGTGGAGCTGGATCCGCCAGCCCCCAGGGAAGGGACTGGAGTGGATTGGGGAGATCAATGGTAATAGTGGGAGCACCAACTACAACCCCTCCCTCAAGAGTCGAGTCACCATTTCAAAAGACGCGTCCAAGAACCAGTTCTCCCTGAAGCTGAGCTCTGTGACCGCCGCGGACACGGCCGTGTATTACTGTGCGAGAGA	QVQLQESGPGLVKPSETLSVTCTVSGASISSYWWSWIRQPPGKGLEWIGEINGNSGSTNYNPSLKSRVTISKDASKNQFSLKLSSVTAADTAVYYCAR
IGHV4-149*01_S1430	CAGGTGCAGCTGCAGGAGTCGGGCCCAGGACTGGTGAAGCCTTCGGAGACCCTGTCCCTCACCTGCACTGTCTCTGGTGCCTCCATTAGTAGTAACTGGTGGAGCTGGATCCGCCAGCCCCCAGGGAAGGGACTGGAGTGGATTGGGGAGATCAATGGTAATAGTGGGAGCACCAACTACAACCCCTCCCTCAAGAGTCGAGTCACCATTTCAAAAGACGCGTCCAAGAACCAGTTCTCCCTGAAGCTGAGCTCTGTGACCGCCGCGGACACGGCCGTGTATTACTGTGCGAGAGA	QVQLQESGPGLVKPSETLSLTCTVSGASISSNWWSWIRQPPGKGLEWIGEINGNSGSTNYNPSLKSRVTISKDASKNQFSLKLSSVTAADTAVYYCAR
IGHV4-150*01_S2067	CAGGTGCAGCTGCAGGAGTCGGGCCCAGGACTGGTGAAGCCTTCGGAGACCCTGTCCCTCACCTGCACTGTCTCTGGTGGCTCCATCAGCGGTTACTACTGGAGCTGGATCCGCCAGCCCCCAGGGAAGGGACTGGAGTGGATTGGGAATATTGATGGTAATAGTGCGGGCACCAACTACAACCCCTCCCTCAAGAGTCGAGTCACCATTTCAAAAGACACGTCCAAGAATCAGTTCTCCCTGAAGCTGAGCTCTGTGACCGCCGCGGACACGGCCGTGTATTACTGTGCGAGAAA	QVQLQESGPGLVKPSETLSLTCTVSGGSISGYYWSWIRQPPGKGLEWIGNIDGNSAGTNYNPSLKSRVTISKDTSKNQFSLKLSSVTAADTAVYYCAR
IGHV4-174*02_S2437	CAGGTGCAGCTGCAGGAGTCGGGCCCAGGACTGGTGAAGCCTTCGGAGACCCTGCCCCTCACCTGCGCTGTCTCTGGTGCCTCCATCAGCAGTAACTACTGGAGCTGGATCCGCCAGCCCCCAGGGAAGGGACTGGAGTGGATTGGACGTATCTATGGTAGTGGTGGGAGCACCGACTACAACCCCTCCCTCAAGAGTCGAGTCACCATTTCCAAAGACACGTCCAAGAACCAGTTCTCCCTGAAGCTGAGCTCTGTGACCGCCGCGGACACGGCCGTGTATTACTGTGCGAGAGA	QVQLQESGPGLVKPSETLPLTCAVSGASISSNYWSWIRQPPGKGLEWIGRIYGSGGSTDYNPSLKSRVTISKDTSKNQFSLKLSSVTAADTAVYYCAR
IGHV4-67*01	CAGGTGCAGCTGCAGGAGTCGGGCCCAGCAGTGGTGAAGCCTTCGGAGACCCTGTCCCTCACCTGCGCTGTCTCTGGTGGCTCCATCAGCAGTAGTAACTGGTGGAGCTGGATCCGCCAGTCCCCAGGGAAGGGGCTGGAATGGATTGGGGGTATCTATGGTAGTGGTGGGAGCACCGAATACAACCCCTCCCTCAAGAGTCGAGTCACCATTTCAATAGACACGTCCAAGAACCAGTTCTCCCTGAAGCTGAGCTCTGTGACCGCCGCGGACACCGCCGTGTATTACTGTGCGAGACA	QVQLQESGPAVVKPSETLSLTCAVSGGSISSSNWWSWIRQSPGKGLEWIGGIYGSGGSTEYNPSLKSRVTISIDTSKNQFSLKLSSVTAADTAVYYCAR
IGHV4-67*02_S6848	CAGGTGCAGCTGCAGGAGTCGGGCCCAGCAGTGGTGAAGCCTTCGGAGACCCTGTCCCTCACCTGCGCTGTCTCTGGTGGCTCCATCAGCAGTAGTAACTGGTGGAGCTGGATCCGCCAGTCCCCAGGGAAGGGGCTGGAATGGATTGGGGGTATCTATGGTAGTGGTGGGAGCACCGAATACAACCCCTCCCTCAAGAGTCGAGTCACCATTTCAATAGACACGTCCAAGAACCAGTTCTCCCTGAAGCTGAGCTCTGTGACCGCCGCGGACACCGCCGTGTATTACTGTGCGAGAGA	QVQLQESGPAVVKPSETLSLTCAVSGGSISSSNWWSWIRQSPGKGLEWIGGIYGSGGSTEYNPSLKSRVTISIDTSKNQFSLKLSSVTAADTAVYYCAR
IGHV4-67*02_S8103	CAGGTGCAGCTGCAGGAGTCGGGCCCAGCAGTGGTGAAGCCTTCGGAGACCCTGTCCCTCACCTGCGCTGTCTCTGGTGGCTCCATCAGCAGTAGTAACTGGTGGAGCTGGATCCGCCAGTCCCCAGGGAAGGGGCTGGAATGGATTGGGGGTATCTATGGTAGTGGTGGGAGCACCGAATACAACCCCTCCCTCAAGAGTCGAGTCACCATTTCAACAGACACGTCCAAGAACCAGTTCTCCCTGAAGCTGAGCTCTGTGACCGCCGCGGACACCGCCGTGTATTACTGTGCGAGAGA	QVQLQESGPAVVKPSETLSLTCAVSGGSISSSNWWSWIRQSPGKGLEWIGGIYGSGGSTEYNPSLKSRVTISTDTSKNQFSLKLSSVTAADTAVYYCAR
IGHV4-72*01	CAGGTGCAGCTGCAGGAGTCGGGCCCAGGACTGGTGAAGCCTTCGGAGACCCTGTCCCTCACCTGCGCTGTCTCTGGTTACTCCATCAGCAGTGGTTACTACTGGGGCTGGATCCGTCAGCCCCCAGGGAAGGGACTGGAGTATATTGGGTATATCAGTGGTAGTAGTGGGAGCACCTACTACAACCCCTCCCTCAAGAGTCGAGTCACCATTTCAAAAGACACGTCCAAGAACCAGTTCTCCCTGAAGCTGAGCTCTGTGACCGCCGCGGACACGGCCGTGTATTACTGTGCGAGACA	QVQLQESGPGLVKPSETLSLTCAVSGYSISSGYYWGWIRQPPGKGLEYIGYISGSSGSTYYNPSLKSRVTISKDTSKNQFSLKLSSVTAADTAVYYCAR
IGHV4-79*02_S9501	CAGGTGCAGCTGCAGGAGTCGGGCCCAGGACTGGTGAAGCCTTCGGAGACCCTGTCCCTCACCTGCGCTGTCTCTGGTGCCTCCATCAGTAGTTACTGGTGGAGCTGGATCCGCCAGCCCCCAGGGAAGGGACTGGAGTGGATTGGGGAGATCAATGGTAATAGTGGTAGCACCTACTACAACCCCTCCCTCAAGAGTCGAGTCACCATTTCAAAAGACGCGTCCAAGAACCAGTTCTCCCTGAAGCTGAGCTCTGTGACCGCCGCGGACACGGCCGTGTATTACTGTGCGAGAGA	QVQLQESGPGLVKPSETLSLTCAVSGASISSYWWSWIRQPPGKGLEWIGEINGNSGSTYYNPSLKSRVTISKDASKNQFSLKLSSVTAADTAVYYCAR
IGHV4-93*01_S0998	CAGGTGCAGCTGCAGGAGTCGGGCCCAGGACTGGTGAAGCCTTCGGAGACCCTGTCCCTCACCTGCGCTGTCTCTGGTGGCTCTATCAGCAGTAGTTACTACTACTGGAGCTGGATCCGCCAGGCCCCAGGGAAGGGACTGGAGTGGATTGGGTACATCTCTTATAGTGGGAGCACCAGCTACAACCCGTCCCTCAAGAGTCGAGTCACCATTTCAAGAGACACGTCCAAGAACCAGTTCTCCCTGAAGCTGAGCTCTGTGACCGCCGCGGACACGGCCGTGTATTACTGTGCGAGCGA	QVQLQESGPGLVKPSETLSLTCAVSGGSISSSYYYWSWIRQAPGKGLEWIGYISYSGSTSYNPSLKSRVTISRDTSKNQFSLKLSSVTAADTAVYYCAS
IGHV4-93*01_S1164	CAGGTGCAGCTGCAGGAGTCGGGCCCAGGACTGGTGAAGCCTTCGGAGACCCTGTCCCTCACCTGCGCTGTCTCTGGTTACTCCATCAGCAGTGGTTACTACTGGAGCTGGATCCGCCAGCCCCCAGGGAAGGGACTGGAGTGGATTGGGTACATCACTTATAGTGGGAGCACCAGCTACAACCCGTCCCTCAAGAGTCGAGTCACCATTTCAAGAGACACGTCCAAGAACCAGTTCTCCCTGAAGCTGAGCTCTGTGACCGCCGCGGACACGGCCGTGTATTACTGTGCGAGAGA	QVQLQESGPGLVKPSETLSLTCAVSGYSISSGYYWSWIRQPPGKGLEWIGYITYSGSTSYNPSLKSRVTISRDTSKNQFSLKLSSVTAADTAVYYCAR
IGHV4-NL_1*01_S9508	CAGCTGCAGCTGCAGGAGTCGGGCCCAGGACTGGTGAAGCCTTCGGAGACCCTGTCTGTCACCTGCGCTGTCTCTGGTGGCTCTATCAGCAGTAGCTACTGGAGCTGGATCCGCCAGGCCCCAGGGAAGGGACTGGAGTGGATTGGGTATATCTATGGTAGTGGTAGTAGCACCAACTACAACCCCTCCCTCAAGAGTCGAGTCACCCTGTCAGTAGACACGTCCAAGAACCAGCTCTCCCTGAAGCTGAGCTCTGTGACCGCCGCGGACACGGCCGTGTATTACTGTGCGAGAGA	QLQLQESGPGLVKPSETLSVTCAVSGGSISSSYWSWIRQAPGKGLEWIGYIYGSGSSTNYNPSLKSRVTLSVDTSKNQLSLKLSSVTAADTAVYYCAR
IGHV4-NL_1*02_S4188	CAGGTGCAGCTGCAGGAGTCGGGCCCAGGACTGGTGAAGCCTTCGGAGACCCTGTCCCTCACCTGCGCTGTCTCTGGTGGCTCTATCAGCAGTAGCTACTGGAGCTGGATCCGCCAGGCCCCAGGGAAGGGACTGGAGTGGATTGGGCGTATCGATAGTAGTGGGAGCACCTACTACAACCCCTCCCTCAAGAGTCGAGTCACCCTGTCAGTAGACACGTCCAAGAACCAGTTCTCCCTGAAGCTGAGCTCTGTGACCGCCGCGGACACGGCCGTGTATTACTGTGCGAGAGA	QVQLQESGPGLVKPSETLSLTCAVSGGSISSSYWSWIRQAPGKGLEWIGRIDSSGSTYYNPSLKSRVTLSVDTSKNQFSLKLSSVTAADTAVYYCAR
IGHV4-NL_10*01_S0458	CAGCTGCAGCTGCAGGAGTCGGGCCCAGGACTGGTGAAGCCTTCGGAGACCCTGTCCCTCACCTGCGCTGTCTCTGGTGGCTCTATCAGCGGTTACTGGTGGAGCTGGATCCGCCAGCCCCCAGGGAAGGGGCTGGAGTGGATTGGGCGTATCGATAGTAGTGGGAGCACCGACTACAACCCCTCCCTCAAGAGTCCAGTCACCATTTCAAGAGACACGTCCAAGAACCAGTTCTCCCTGAAGCTGAGCTCTGTGACCGCCGCGGACACGGCCGTGTATTACTGTGCGAGAGA	QLQLQESGPGLVKPSETLSLTCAVSGGSISGYWWSWIRQPPGKGLEWIGRIDSSGSTDYNPSLKSPVTISRDTSKNQFSLKLSSVTAADTAVYYCAR
IGHV4-NL_11*01_S0325	CAGGTGCAGCTGCAGGAGTCAGGCCCAGGAGTGGTGAAGCCTTCGGAGACCCTGTCCCTCACCTGCGCTGTCTCTGGTGGCTCTATCAGCGGTTACTACCTCTGGAGCTGGATCCGCCAGCCCCCAGGGAAGGGACTGGAGTGGATTGGGTATATCTATGGTGGTAGTGGGAGCACCAGCTACAACCCCTCCCTCAAGAGTCGAGTCATCATTTCAATAGACACGTCCAAGAACCAGTTCTCCCTGAAGCTGAGCTCTGTGACCGCCGCGGACACGGCCGTGTATTACTGTGCGAGCGA	QVQLQESGPGVVKPSETLSLTCAVSGGSISGYYLWSWIRQPPGKGLEWIGYIYGGSGSTSYNPSLKSRVIISIDTSKNQFSLKLSSVTAADTAVYYCAS
IGHV4-NL_17*01_S0936	CAGGTGCAGCTGCAGGAGTCGGGCCCAGGAGTGGTGAAGCCTTCGGAGACCCTGTCCCTCACCTGCGCTGTCTCTGGTGGCACCATCAGCAGTGGTTACTACTACTGGAGCTGGATCCGCCAGCCCCCAGGGAAGGGGCTGGAGTGGATTGGGGGTATCTATAGTAATAGTGAGAGTACCAACTACAACCCCTCCCTCAAGAGTCGAGTCACCATTTCAAAAGACACGTCCAAGAACCAGTTCTCCCTAAAGCTGAGCTCTGTGACCGCCACGGACACGGCCGTGTATTACTGTGCGAGAGA	QVQLQESGPGVVKPSETLSLTCAVSGGTISSGYYYWSWIRQPPGKGLEWIGGIYSNSESTNYNPSLKSRVTISKDTSKNQFSLKLSSVTATDTAVYYCAR
IGHV4-NL_17*01_S2814	CAGGTGCAGCTGCAGGAGTCGGGCCCAGGACTGGTGAAGCCGTCGGAGACCCTGTCCCTCACCTGCGCTGTCTCTGGTGGCTCCATCAGCAGTAGTAACTGGTGGAGCTGGATCCGCCAGCCCCCAGGGAAAGGGCTGGAGTGGATTGGGGGTATCTATAGTAATAGTGAGAGTACCAACTACAACCCCTCCCTCAAGAGTCGAGTCACCATTTCAAAAGACACGTCCAAGAACCAGTTCTCCTTGAAGCTGAGCTCTGTGACCGCTGCGGACACGGCCGTGTATTACTGTGCGAGAGA	QVQLQESGPGLVKPSETLSLTCAVSGGSISSSNWWSWIRQPPGKGLEWIGGIYSNSESTNYNPSLKSRVTISKDTSKNQFSLKLSSVTAADTAVYYCAR
IGHV4-NL_21*01_S0138	CAGGTGCAGCTGCAGGAGTCGGGCCCAGGACTGGTGAAGCCTTCGGAGACCCTGTCCCTCACCTGCGCTGTCTCTGGTTACTCCATCAGCAGTGGTTATGGCTGGAGCTGGATCCGCCAGCCCCCAGGGAAGGGGCTGGAGTGGATTGGGTATATCGGTGGTAGTAGTGGTAGCACCAACTACAACCCCTCCCTCAAGAGTCGAGTCACCATTTCAAAAGACACGTCCAAGAACCAGTTCTCCCTGAAGCTGAGCTCTGTGACCGCCGCGGACACGGCCGTGTATTACTGTGCGAGAGA	QVQLQESGPGLVKPSETLSLTCAVSGYSISSGYGWSWIRQPPGKGLEWIGYIGGSSGSTNYNPSLKSRVTISKDTSKNQFSLKLSSVTAADTAVYYCAR
IGHV4-NL_21*01_S7469	CAGGTGCAGCTGCAGGAGTCGGGCCCAGGACTGGTGAAGCCTTCGGAGACCCTGTCCCTCACCTGCGCTGTCTCTGGTGGCTCCATCAGCAGTGGTTACTACTGGAGCTGGATCCGCCAACCCCCAGGGAAGGGGCTGGAGTGGATTGGGTATATCGGTGGTAGTAGTGGTAGCACCTACTACAACCCCTCCCTCAAGAGTCGAGTCACCATTTCAAAAGACACGTCCAAGAACCAGTTCTCCCTGAAGCTGAGCTCTGTGACCGCCGCGGACACGGCCGTGTATTACTGTGCGAGAGA	QVQLQESGPGLVKPSETLSLTCAVSGGSISSGYYWSWIRQPPGKGLEWIGYIGGSSGSTYYNPSLKSRVTISKDTSKNQFSLKLSSVTAADTAVYYCAR
IGHV4-NL_22*01_S2393	CAGGTGCAGCTGCAGGAGTCGGGCCCAGGACTGTTGAAGCCTTCGGAGACCCTGTCCCTCACCTGCGCTGTCTCTGGTGGCTCCATCAGCGGTGGTTATGGCTGGGGCTGGATCCGCCAGCCCCCAGGGAAGGGGCTGGAGTGGATTGGGAGTATCTATAGTAGTAGTGGGAACACCTACTACAACCCCTCCCTCAAGAGTCGAGTCACCATTTCAACAGACACGTCCAAGAACCAGTTCTCCCTGAAGCTGAGCTCTGTGACCGCCGCGGACACGGCCGTGTATTACTGTGCGAGAGA	QVQLQESGPGLLKPSETLSLTCAVSGGSISGGYGWGWIRQPPGKGLEWIGSIYSSSGNTYYNPSLKSRVTISTDTSKNQFSLKLSSVTAADTAVYYCAR
IGHV4-NL_22*01_S6977	CAGGTGCAGCTGCAGGAGTCGGGCCCAGGACTGTTGAAGCCTTCAGACACCCTGTCCCTCACCTGCGCTGTCTCTGGTGGCTCCATCAGCGGTGGTTATGGCTGGGGCTGGATCCGCCAGCCCCCAGGGAAGGGGCTGGAGTGGATTGGGAGTATCTATAGTAGTAATGGGAACACCTACTACAACCCCTCCCTCAAGAGTCGAGTCACCATTTCAACAGACACGTCCAAGAACCAGTTCTCCCTGAAACTGAGCTCTGTGACCGCCGCGGACACGGCCGTGTATTACTGTGCGAGAGA	QVQLQESGPGLLKPSDTLSLTCAVSGGSISGGYGWGWIRQPPGKGLEWIGSIYSSNGNTYYNPSLKSRVTISTDTSKNQFSLKLSSVTAADTAVYYCAR
IGHV4-NL_24*01_S1628	CAGGTGCAGCTGCAGGAGTCGGGCCCAGGACTGGTGAAGCCTTCCGAGACCCTGTCCCTCACCTGCGCTGTCTCTGGTGGCTCCATCAGCGGTGGTTATGGCTGGAGCTGGATCCGCCAGCCCCCAGGGAAGGGGCTGGAGTGGATTGGGCATATCTTTGGTAGTATTGGGAGCACCTACTACAACCCCTCCCTCAAGAGTCGAGTCACCATTTCAAGAGACACGTCCAAGAACCAGTTCTCCCTGAAGCTGAGCTCTGTGACCGCCGCGGACACGGCCGTGTATTACTGTGCGAGAGA	QVQLQESGPGLVKPSETLSLTCAVSGGSISGGYGWSWIRQPPGKGLEWIGHIFGSIGSTYYNPSLKSRVTISRDTSKNQFSLKLSSVTAADTAVYYCAR
IGHV4-NL_25*01_S9955	CAGGTGCAGCTGCAGGAGTCGGGCCCAGGAGTGGTGAAGCCTTCAGAGACCCTGTCCCTCACCTGCGCTGTCTCTGGAGGCTCTATCAGCAGTGGTTATGACTGGAGCTGGATCCGCCAGCCCCCAGGGAAGGGGCTGGAGTGGATTGGGTATATCTATGGTAGTAGTGGGAGCACCAACTACAACCCGTCCCTCAAGAATCGAGTCACCATTTCAAAAGACGCGTCCAAGAACCAGTTCTCCCTGAAGCTGAGCTCTGTGACCGCCGCGGACACGGCCGTGTATTACTGTGCGAGAGA	QVQLQESGPGVVKPSETLSLTCAVSGGSISSGYDWSWIRQPPGKGLEWIGYIYGSSGSTNYNPSLKNRVTISKDASKNQFSLKLSSVTAADTAVYYCAR
IGHV4-NL_27*01_S3510	CAGGTGCAGCTGCAGGAGTCGGGCCCAGGACTGGTGAAGCCTTCGGAGACCCTGTCCCTCACCTGCGCTGTCTCTGGTGGCTCCATCAGCAGTGGTTATGGCTGGAGCTGGATCCGCCAGCCCCCAGGAAAGGGGCTGGAGTGGATTGGGAGTATCTATAGTAGTGGGAGCAACTACCTTAACCCGTCCCTCAAGAGTCGAGTCACCCTGTCAGTAGACACGTCCAAGAACCAGTTCTCCCTGAAGCTGAGCTCTGTGACCGCCGCGGACACGGCCGTGTATTACTGTGCGAGAGA	QVQLQESGPGLVKPSETLSLTCAVSGGSISSGYGWSWIRQPPGKGLEWIGSIYSSGSNYLNPSLKSRVTLSVDTSKNQFSLKLSSVTAADTAVYYCAR
IGHV4-NL_33*01_S6605	CAGGTGCAGCTGCAGGAGTCGGGCCCAGGACTGGTGAAGCCTTCAGAGACCCTGTCCCTCACCTGCGCTGTCTCTGGTGGCTCTATCAGCAGTAGTAACTGGTGGAGCTGGATCCGCCAGCCCCCAGGGAAAGGGCTGGAGTGGATTGGGCATATCAGTGGTAGTAGTGGTAGCACCTACTACAACCCCTCCCTCAAGAGTCGAGTCTCCATTTCAAAAGACACGTCCAAGAACCAGTTCTCCCTGAAGCTGAGCTCTGTGACCGCCGCGGACACGGCCGTGTATTACTGTGCGAGACA	QVQLQESGPGLVKPSETLSLTCAVSGGSISSSNWWSWIRQPPGKGLEWIGHISGSSGSTYYNPSLKSRVSISKDTSKNQFSLKLSSVTAADTAVYYCAR
IGHV4-NL_33*01_S6713	CAGGTGCAGCTGCAGGAGTCGGGCCCAGGACTGGTGAAGCCTTCAGAGACCCTGTCCCTCACCTGCGCTGTCTCTGGTGGCTCTATCAGCAGTAGTAACTGGTGGAGCTGGATCCGCCAGCCCCCAGGGAAAGGGCTGGAGTGGATTGGGCATATCAGTGGTAGTAGTGGTAGCACCTACTACAACCCCTCCCTCAAGAGTCGAGTCTCCATTTCAAAAGACACGTCCAAGAACCAGTTCTCCCTGAAGCTGAGCTCTGTGACCGCCGCGGACACGGCCGTGTATTACTGTGCGAGAGA	QVQLQESGPGLVKPSETLSLTCAVSGGSISSSNWWSWIRQPPGKGLEWIGHISGSSGSTYYNPSLKSRVSISKDTSKNQFSLKLSSVTAADTAVYYCAR
IGHV4-NL_36*01_S3269	CAGGTGCAGCTGCAGGAGTCGGGCCCAGGACTGGTGAAGCCTTCGGAGACCCTGTCCCTCACCTGCGCTGTCTCTGGTGGCTCCTTCAGCGGTTACTACTGGGGCTGGATCCGCCAGCCCCCAGGGAAGGGGCTGGAGTGGATTGGGTATATCAGTGGTAGTAGTGGGAGCACCGACTACAACCCCTCCCTCAAGAGTCGAGTCACCATTTCAACAGACACGTCCAAGAACCAGTTCTCCCTGAAGCTGAGCTCTGTGACCGCCGCGGACACGGCCGTGTATTACTGTGCGAGAGA	QVQLQESGPGLVKPSETLSLTCAVSGGSFSGYYWGWIRQPPGKGLEWIGYISGSSGSTDYNPSLKSRVTISTDTSKNQFSLKLSSVTAADTAVYYCAR
IGHV4-NL_36*01_S9644	CAGGTGCAGCTGCAGGAGTCGGGCCCAGGACTGGTGAAGCCTTCGGAGACCCTGTCCCTCACCTGCGCTGTCTCTGGTGGCTCCATCAGCGGTTACTGGTGGGGCTGGATCCGCCAGCCCCCAGGGAAGGGGCTGGAGTGGATTGGGTATATCGGTGGTAGTAGTGGGAGCACCTACTACAACCCCTCCCTCAAGAGTCGAGTCACCATTTCAACAGACACGTCCAAGAACCAGTTCTCCCTGAAGCTGAGCTCTGTGACCGCCGCGGACACGGCCGTGTATTACTGTGCGAGAGA	QVQLQESGPGLVKPSETLSLTCAVSGGSISGYWWGWIRQPPGKGLEWIGYIGGSSGSTYYNPSLKSRVTISTDTSKNQFSLKLSSVTAADTAVYYCAR
IGHV4-NL_38*01_S9472	CAGGTGCAGCTGCAGGAGTCGGGCCCAGGACTGGTGAAGCCTTCGGAGACCCTGTCCCTCACCTGCGCTGTCTCTGGTGGCTCCATCAGCGATAGTTACTACTGGAACTGGATCCGCCAACCCCCAGGGAAGGGGCTGGAGTGGATTGGGAATATCTATGGTAATAGTGCGAGCACCTACTACAACCCCTCCCTCAAGAGTCGAGTCACCATTTCAAAAGACACGTCCAAGAACCAGTTCTTCCTGAAGCTGAGCTCTGTGACCGCCGCGGACACCGCCGTGTATTACTGTGCGAGAGA	QVQLQESGPGLVKPSETLSLTCAVSGGSISDSYYWNWIRQPPGKGLEWIGNIYGNSASTYYNPSLKSRVTISKDTSKNQFFLKLSSVTAADTAVYYCAR
IGHV4-NL_5*01_S0917	CAGGTGCAGCTGCAGGAGTCGGGCCCAGGACTGGTGAAGCCTTCGGAGACCCTGTCCCTCACCTGCGCTGTCTCTGGTGGCTCCATCAGCAGTAGTAACTGGTGGAGCTGGATCCGCCAGTCCCCAGGGAAGGGGCTGGAGTGGATTGGGTATATCTATGGTGGTAGTGGGAGCACCAGCTACAACCCCTCCCTCAAGAGTCGAGTCACCATTTCAACAGACACGTCCAAGAACCAGTTTTCCCTGAAGCTGAGCTCTGTGACCGCCGCGGACACCGCCGTGTATTACTGTGCGAGACA	QVQLQESGPGLVKPSETLSLTCAVSGGSISSSNWWSWIRQSPGKGLEWIGYIYGGSGSTSYNPSLKSRVTISTDTSKNQFSLKLSSVTAADTAVYYCAR
IGHV4-NL_5*01_S4603	CAGGTGCAGCTGCAGGAGTCGGGCCCAGGACTGGTGAAGCCTTCGGAGACCCTGTCCCTCACCTGCGCTGTCTCTGGTGGCTCCATCAGCAGTAACTACTGGAGCTGGATCCGCCAGTCCCCAGGGAAGGGTCTGGAGTGGATTGGGTATATCTATGGTGGTAGTGGGAGCACCAGCTACAACCCCTCCCTCAAGAGTCGAGTCACCATTTCAACAGACACGTCCAAGAACCAGTTTTCCCTGAAGCTGAGCTCTGTGACCGCCGCGGACACCGCCGTGTATTACTGTGCGAGATA	QVQLQESGPGLVKPSETLSLTCAVSGGSISSNYWSWIRQSPGKGLEWIGYIYGGSGSTSYNPSLKSRVTISTDTSKNQFSLKLSSVTAADTAVYYCAR
IGHV4-NL_7*02_S4732	CAGGTGCAGCTACAGGAGTCGGGCCCAGGAGTGGTGAAGCCTTCGGAGACCCTGTCCCTCACCTGCGCTGTCTCTGGTGGCTCCATCAGCAGTTACTGGTGGGGCTGGATCCGCCAGCCCCCAGGGAAGGGACTGGAGTGGATTGGACAGATCTATGGTGGTAGTGGTAGCACCAGCTACAACCCCTCCCTCAAGAGTCGAGTCACCATTTCAAGTGACACGTCCAAGAACCAGTTCTCCCTGAAGCTGAGCTCTGTGACCGCCGCGGACACGGCCGTGTATTACTGTGCGAAAGACA	QVQLQESGPGVVKPSETLSLTCAVSGGSISSYWWGWIRQPPGKGLEWIGQIYGGSGSTSYNPSLKSRVTISSDTSKNQFSLKLSSVTAADTAVYYCAKD
IGHV4-NL_9*01_S4906	CAGGTGCAGCTGCAGGAGTCGGGCCCAGAACTGGTGAAGCCTTCGGAGACCCTGTCCCTCACCTGCGCTGTCTCTGGTGGCTCCATCAGCAGTAACTACTGGAGCTGGATCCGCCAGCCCCCAGGGAAGGGACTGGAGTGGATTGGGTATATCGGTGGTAGTAGTGGTAGCACCAACTACAACCCCTCCCTCAAGAGTCGAGTAACCATTTCAACAGACACGTCCAAGAACCAGTTCTCCCTGAAGCTGAGCTCTGTGACCGCCGCGGACACGGCCGTGTATTACTGTGCGAGAGA	QVQLQESGPELVKPSETLSLTCAVSGGSISSNYWSWIRQPPGKGLEWIGYIGGSSGSTNYNPSLKSRVTISTDTSKNQFSLKLSSVTAADTAVYYCAR
IGHV5-15*01_S9061	GAGGTGCAGCTGGTGCAGTCTGGAGCAGAGGTGAAAAGGCCCGGGGAGTCTCTGAAGATCTCCTGTAAGACTTCTGGATACAGCTTTACCAGCTACTGGATCAGCTGGGTGCGCCAGATGCCCGGGAAAGGCCTGGAGTGGATGGGGGCGATTGATCCTAGTGATTCTGATACCAGATACAACCCGTCCTTCCAAGGCCAGGTCACCATCTCAGCCGACAAGTCCATCAGCACCGCCTACCTGCAGTGGAGCAGGCTGAAGGCCTCGGACACCGCCACGTATTACTGTGCGAAAGA	EVQLVQSGAEVKRPGESLKISCKTSGYSFTSYWISWVRQMPGKGLEWMGAIDPSDSDTRYNPSFQGQVTISADKSISTAYLQWSRLKASDTATYYCAK
IGHV5-157*01_S5960	GAGGTGCAGCTGGTGCAGTCTGGAGCAGAGGTGAAAAGGCCCGGGGAATCTCTGAGGATCTCCTGTAAGACTTCTGGATACAGCTTTACCGGCAGCTGGATCAGCTGGGTGCGCCAGATGCCCGGGAAAGGCCTGGAGTGGATGGGGAGCATCTATCCTGGTGATTCTGATACCAGATACAACCCGTCCTTCCAAGGCCACGTCACTATCTCAGCCGACAAGTCCATCAGCACCACCTACCTGCAGTGGAGCAGCCTGAAGGCCTCGGACACTGCCACGTATTACTGTGCGAAAGT	EVQLVQSGAEVKRPGESLRISCKTSGYSFTGSWISWVRQMPGKGLEWMGSIYPGDSDTRYNPSFQGHVTISADKSISTTYLQWSSLKASDTATYYCAK
IGHV5-157*01_S6479	GAGGTGCAGCTGGTGCAGTCTGGAGCAGAGGTGAAAAGGCCCGGGGAATCTCTGAGGATCTCCTGTAAGACTTCTGGATACAGCTTTACCGGCAGCTGGATCAGCTGGGTGCGCCAGATGCCCGGGAAAGGCCTGGAGTGGATGGGGAGCATCTATCCTGGTGATTCTGATACCAGATACAACCCGTCCTTCCAAGGCCACGTCACTATCTCAGCCGACAAGTCCATCAGCACCACCTACCTGCAGTGGAGCAGCCTGAAGGCCTCGGACACCGCCACGTATTACTGTGCGAAAGT	EVQLVQSGAEVKRPGESLRISCKTSGYSFTGSWISWVRQMPGKGLEWMGSIYPGDSDTRYNPSFQGHVTISADKSISTTYLQWSSLKASDTATYYCAK
IGHV7-135*01_S9086	CAGGTGCAGCTGGTGCAGTCTGGGCCTGAGGTGAAGCAGCCTGGGGCCTCAGTGAAGGTCTCCTGCAAGGCTTCTGGTTACAGCTTCACCACCTATGGTATGAATTGGGTGCGACAGGCCCCTGGACAGGGCCTTGAGTGGATGGGATGGATGAACACCTACACTGGGAACCCAACGTATGCCCAGGGCTTCACAGAACGGTTTGTCTTCTCCATGGACACCTCTGTCAGCACAGTGTACCTGCAGATCAGCAGCCTAAAGGCTGAGGACACGGCCGTGTATTACTGTGCGAGATA	QVQLVQSGPEVKQPGASVKVSCKASGYSFTTYGMNWVRQAPGQGLEWMGWMNTYTGNPTYAQGFTERFVFSMDTSVSTVYLQISSLKAEDTAVYYCAR
IGHV7-86*01	CAGGTGCAGCTGGTGCAGTCTGGGGCTGAGGTGAAGCAGCCGGGGGCCTCAGTGAAGGTCTCCTGCAAGGCTTCTGGATACACCTTCACTAGCTATGGTATGAATTGGGTGCGACAGGCCCATGGACAACGGCTTGAGTGGATGGGATGGATCAACACCGACACTGGGAACCCAACATATGCCCAGGGCTTCAAAGAACGATTTACCTTCTCCATGGACACCTCTATCAGCACGGCATATCTGCAGATCAGCAGCCTAAAGGCTGAGGACACGGCCGTGTATTACTGTGCAAGACA	QVQLVQSGAEVKQPGASVKVSCKASGYTFTSYGMNWVRQAHGQRLEWMGWINTDTGNPTYAQGFKERFTFSMDTSISTAYLQISSLKAEDTAVYYCAR
IGHJ1-1*01	GCTGAATACTTCGAGTTCTGGGGCCAGGGCGCCCTGGTCACCGTCTCCTCAG	AEYFEFWGQGALVTVSS
IGHJ2*01	CTACTGGTACTTCGATCTCTGGGGCCCTGGCACCCCAATCACCATCTCCTCAG	YWYFDLWGPGTPITISS
IGHJ3-2*01	TGATGCTTTTGATTTCTGGGGCCAAGGGCTCAGGGTCACCGTCTCTTCAG	DAFDFWGQGLRVTVSS
IGHJ4-3*01	ACTACTTTGACTACTGGGGCCAGGGAGTCCTGGTCACCGTCTCCTCAG	YFDYWGQGVLVTVSS
IGHJ5-4*02	ACAACTGGTTCGATGTCTGGGGCCCGGGAGTCCTGGTCACCGTCTCCTCAG	NWFDVWGPGVLVTVSS
IGHJ5-5*01	ACAACTCATTGGATGTCTGGGGCCGGGGAGTTCTGGTCACCGTCTCCTCAG	NSLDVWGRGVLVTVSS
IGHJ6-6*01	ATTACTACGGTTTGGATTCCTGGGGCCAAGGGGTCGTCGTCACCGTCTCCTCAG	YYGLDSWGQGVVVTVSS

## Sheet: I10_IGK
Allele	Sequence (NT)	Sequence (AA)
IGKV1-19*01_S1645	GACATCCAGATGACCCAGTCTCCATCCTCCCTGTCTGCATCTGTAGGAGACAAAGTCACCATCACTTGCCATGCCAGTCAGGGTATTAGCAGCTGGTTAGCCTGGTATCAGCAGAAACCAGGGAAAGCCCCTAAGCCCCTGATCTATAAGGCATCCAGTTTACAAAGTGGGGTCCCATCAAGGTTCAGCGGCAGTGGATCTGGGACGGATTACACTCTCACCATCAGCAGCCTGCAGCCTGAAGATTTTGCAACTTATTACTGTCAACAGTATGATGATCTCCCTCC	DIQMTQSPSSLSASVGDKVTITCHASQGISSWLAWYQQKPGKAPKPLIYKASSLQSGVPSRFSGSGSGTDYTLTISSLQPEDFATYYCQQYDDLP
IGKV1-22*01_S6268_kim	GACATCCAGATGACCCAGTCTCCATCCTCCCTGTCTGCATCTGTAGGAGACACAGTCACCATCACTTGCCGGGCGAGTCAGAGTATTAGCAGCTGGTTAGACTGGTATCAGCAGAAACCAGGGAAAGCCCCTAAGCTCCTGATCTATAAGGCATCCAGTTTGCAAAGTGGGGTCCCATCAAGGTTCAGCGGCAGTGGATCTGGGACAGATTTCACTCTCACCATCAGCAGCCTGCAGCCTGAAGATTTTGCAACTTATTACTGTCTACAGTATAGCAGTAGCCCTCC	DIQMTQSPSSLSASVGDTVTITCRASQSISSWLDWYQQKPGKAPKLLIYKASSLQSGVPSRFSGSGSGTDFTLTISSLQPEDFATYYCLQYSSSP
IGKV1-25*01_S4788	GACATTCAGATGTCCCAGTCTCCATCCTCCCTGTCTGCATCTGTGGGAGACAGAGTCACCATCACTTGTCGGGCAAGTCAGGGCATTAGCAGTTATTTAGCCTGGTATCAGCAGAAACCAGGGAAAGCCCCTAAGCTCCTGATCTATGCTGCATCCACTTTGCAAAGTGGGGTCCCATCAAGGTTCAGCGGCAGTGGATCTGGGACAGATTTCACTCTCACCATCAGCAGCCTGCAGCCTGAAGATTTTGCAACTTATTACTGTCAGCAGCGTAATAGTTACCCTCC	DIQMSQSPSSLSASVGDRVTITCRASQGISSYLAWYQQKPGKAPKLLIYAASTLQSGVPSRFSGSGSGTDFTLTISSLQPEDFATYYCQQRNSYP
IGKV1-28*01_S8814_kim	GACATCCAGATGACCCAGTCTCCTTCCTCCCTGTCTGCTTCTGTAGGAGACACAGTCACCATCACTTGCCGGGCAAGTCAGGGTATTAGCAGTTATTTAAATTGGTTTCAGCAGAAACCAGGGAAAGCCCCTAAGCTCCTGATCTATGCTGCATCCAGTTTGGAAAGCGGGGTCCCATCAAGGTTCAGCGGCAGTGGATCTGGGACAGAATTCACTCTCACCATCAGCAGCCTGCAGCCTGAAGATTTCGCAGCTTATTACTGTCTACAGCATAATAGTTACCCTCC	DIQMTQSPSSLSASVGDTVTITCRASQGISSYLNWFQQKPGKAPKLLIYAASSLESGVPSRFSGSGSGTEFTLTISSLQPEDFAAYYCLQHNSYP
IGKV1-32*02_S1725_kim	GACATTCAGATGTCCCAGTCTCCATCCTCCCTGTCTGCATCTGTAGGAGACAGAGTCACCATCACTTGCCGGGCAAGTCAGGGCATTAGCAGTTATTTAAATTGGTATCAGCAGAAACCGGGGAAAGCCCCTAAGCTCCTGATCTATTATGCAAACAGTTTGGCAAGTGGGGTCCCATCAAGGTTCAGCGGCAGTGGATCTGGGACAGAATTCACTCTCACCATCAGCAGCCTGCAGCCTGAAGATTTTGCAACTTATTACTGTCAACAGGGTAATAGTAACCCTCC	DIQMSQSPSSLSASVGDRVTITCRASQGISSYLNWYQQKPGKAPKLLIYYANSLASGVPSRFSGSGSGTEFTLTISSLQPEDFATYYCQQGNSNP
IGKV1-32*04_kim	GACATTCAGATGTCCCAGTCTCCATCCTCCCTGTCTGCATCTGTAGGAGACAGAGTCACCATCACTTGCCGGGCAAGTCAGGGCATTAGCAGTTATTTAAATTGGTATCAGCAGAAACCGGGGAAAGCCCCTAAGCTCCTGATCTATTATGCAAACAGTTTGGCAAGTGGGGTCCCATCAAGGTTCAGCGGCAGTGGATCTGGGACAGAATTCACTCTCACCATCAGCAGCCTGCAGCCTGAAGATTTTGCAACTTATTACTGTCAACAGGGTAATAGTAATCCTCC	DIQMSQSPSSLSASVGDRVTITCRASQGISSYLNWYQQKPGKAPKLLIYYANSLASGVPSRFSGSGSGTEFTLTISSLQPEDFATYYCQQGNSNP
IGKV1-33*01_S4001_kim	GACATCCAGATGACCCAGTCTCCATCCTCCCTGTCTGCTTCTGTAGGAGACAAAGTCACCATCACTTGCCGAGCCAGTCAGGGCATTAGCAATGCTTTAGCCTGGTATCAGCAGAAACCAGGGAAAGCCCCTAAGCTCCTGATCTATGCTGCATCCAGTTTGCAAAGTGGGGTCCCATCAAGGTTCAGCGGCAGTGGATCTGGGACAGATTTCACTCTCACCATCAGCAGCCTGCAGCCTGAAGATTTTGCAGTTTATTACTGTCAACAGCGTAATAGTTACCCTCC	DIQMTQSPSSLSASVGDKVTITCRASQGISNALAWYQQKPGKAPKLLIYAASSLQSGVPSRFSGSGSGTDFTLTISSLQPEDFAVYYCQQRNSYP
IGKV1-33*01_kim	GACATCCAGATGACCCAGTCTCCATCCTCCCTGTCTGCTTCTGTAGGAGACAAAGTCACCATCACTTGCCGAGCCAGTCAGGGCATTAGCAATGCTTTAGCCTGGTATCAGCAGAAACCAGGGAAAGCCCCTAAGCTCCTGATCTATGCTGCATCCAATTTGCAAAGTGGGGTCCCATCAAGGTTCAGCGGCAGTGGATCTGGGACAGATTTCACTCTCACCATCAGCAGCCTGCAGCCTGAAGATTTTGCAGTTTATTACTGTCAACAGCGTAATAGTTACCCTCC	DIQMTQSPSSLSASVGDKVTITCRASQGISNALAWYQQKPGKAPKLLIYAASNLQSGVPSRFSGSGSGTDFTLTISSLQPEDFAVYYCQQRNSYP
IGKV1-36*03_kim	GACATCCAGATGACCCAGTCTCCATCTTCCCTGTCTGCATCGGTAGGAGACAGAGTCACCATCACTTGCAGGGCAAGTCAGGGCATTAGCGATTATTTAAGTTGGTATCAGCAGAAACCAGGAAAAGCCCCTAAGCTCCTGATCTATGCTGCATCCAGTTTGGAAAGCGGGGTCCCATCAAGGTTCAGCGGCAGTGGATCTGGGACAGAATTCACTCTCACCATCAGCAGCCTGCAGCCTGAAGATTTTGCAGCTTATTACTGTCTACAGGGTTATAGTACCCCTCC	DIQMTQSPSSLSASVGDRVTITCRASQGISDYLSWYQQKPGKAPKLLIYAASSLESGVPSRFSGSGSGTEFTLTISSLQPEDFAAYYCLQGYSTP
IGKV1-37*01_S6239_kim	GACATCCAGATGACCCAGTCTCCATCCTCCCTGTCTGCATCTGTAGGAGACAGAGTCACCATCACTTGTCGGGCAAGTCAGGGCATTAGCAGTTATTTAGCGTGGTATCAGCAGAAACCAGGGAAAGCCCCGAAGCCCCTGATCTATTACGCATCCAATTTGGAAAGTGGGGTCCCATCAAGGTTCAGCGGCAGTGGATCTGGGACAGAATTCACTCTCACCATCAGCAGCCTGCAGTCTGAAGATTTTGCAGTTTATTACTGTCAACAGTATAACAGTGACCCTCC	DIQMTQSPSSLSASVGDRVTITCRASQGISSYLAWYQQKPGKAPKPLIYYASNLESGVPSRFSGSGSGTEFTLTISSLQSEDFAVYYCQQYNSDP
IGKV1-38*01_S0693_kim	GACATTCAGTTGACCCAGTCTCCATCCTCCCTGTCTGCATCTGTAGGAGACAGAGTCACCATCACTTGTCGGGCGAGTCAGGGCATTAGCAGTTATTTAGCCTGGTATCAGCAGAAACCAGGGAAAGCCCCTAAGCTCCTGATCTATGCTGCATCCAGTTTGCAAAGTGGGGTCCCATCAAGGTTCAGCGGCAGTGGATCTGGGACAGAATTCACTCTCACCATCAGCAGCCTGCAGCCTGAAGATTTTGCAGTTTATTACTGTCAACAGCGTAATAGTTACCCTCC	DIQLTQSPSSLSASVGDRVTITCRASQGISSYLAWYQQKPGKAPKLLIYAASSLQSGVPSRFSGSGSGTEFTLTISSLQPEDFAVYYCQQRNSYP
IGKV1-38*01_S7238_kim	GACATTCAGTTGACCCAGTCTCCATCCTCCCTGTCTGCATCTGTAGGAGACAGAGTCACCATCACTTGTCGGGCAAGTCAGGGCATTAGCAGTTATTTAGCCTGGTATCAGCAGAAACCAGGGAAAGCCCCTAAGCTCCTGATCTATTATGCAAACCGTTTGGAAAGTGGGGTCCCATCAAGGTTCAGTGGCAGTGGATCTGGGACAGAATTCACTCTCACCATCAGCAGCCTGCAGCCTGAAGATTTTGCAGTTTATTACTGTCAACAGCGTAATAGTTACCCTCC	DIQLTQSPSSLSASVGDRVTITCRASQGISSYLAWYQQKPGKAPKLLIYYANRLESGVPSRFSGSGSGTEFTLTISSLQPEDFAVYYCQQRNSYP
IGKV1-41*01_S7468_kim	GACATCCAGATGACCCAGTCTCCATCTTCCCTGTCTGCATCTGTAGGAGACAGAGTCACCATCACTTGCAGGGCAAGTCAGAGCATTAGCAATTATTTAAATTGGTATCAGCAGGAACCAGGAAAAGCTCCTAAGCTTCTGATCTATTCTGCATCCAGTTTGCAAAGTGGGGTCCCATCAAGGTTCAGCGGCAGTGGATCTGGGACAGAATTCACTCTCACCATCAGCAGCCTGCAGCCTGAAGATTTTGCAACTTATTATTGTCAACAGTTTAAAAATTACCTTTC	DIQMTQSPSSLSASVGDRVTITCRASQSISNYLNWYQQEPGKAPKLLIYSASSLQSGVPSRFSGSGSGTEFTLTISSLQPEDFATYYCQQFKNYL
IGKV1-41*02_S4680_kim	GACATCCAGATGACCCAGTCTCCATCTTCCCTGTCTGCATCTGTAGGAGACAGAGTCACCATCACTTGCAGGGCAAGTCAGGGCATTAGCAATGATTTAAATTGGTATCAGCAGAAACCAGGAAAAGCTCCTAAGCTCCTGATCTATGCTGCATCCAGTTTGGAAAGTGGGGTCCCATCAAGGTTCAGTGGCAGTGGATCTGGGACAGATTTCACTCTCACCATCAGCAGCCTGCAGCCTGAAGATTTTGCAACTTATTATTGTCAACCGTTTAAAAATTACCTTTC	DIQMTQSPSSLSASVGDRVTITCRASQGISNDLNWYQQKPGKAPKLLIYAASSLESGVPSRFSGSGSGTDFTLTISSLQPEDFATYYCQPFKNYL
IGKV1-43*01_S5004_kim	GACATCCAGATGACCCAGTCTCCATCTTCCCTGTCTGCATCTGCAGGAGACAGAGTCACCATCACTTGCAGGGCAAGTCAGGGCATTAGCACTTATTTAAATTGGTATCAGCAGAAACCAGGAAAAGCTCCTAAGCGCCTGATCTATGCTGCATCCAGTTTGGAAAGTGGGGTCCCATCAAGGTTCAGCGGCAGTGGATCTGGGACAGAATTCACTCTCACCATCAGCAGCCTGCAGCCTGAAGATTTTGCAACTTATTACTGTCTACAGTATAATAGTAACCCTCC	DIQMTQSPSSLSASAGDRVTITCRASQGISTYLNWYQQKPGKAPKRLIYAASSLESGVPSRFSGSGSGTEFTLTISSLQPEDFATYYCLQYNSNP
IGKV1-43*02_kim	GACATCCAGATGACCCAGTCTCCATCTTCCCTGTCTGCATCTGTAGGAGACAGAGTCACCATCACTTGCAGGGCAAGTCAGGGCATTAGCACTTATTTAAATTGGTATCAGCAGAAACCAGGAAAAGCTCCTAAGCGCCTGATCTATGCTGCATCCAGTTTGGAAAGTGGGGTCCCATCAAGGTTCAGTGGCAGTGGATCTGGGACAGATTTCACTCTCACCATCAGCAGCCTGCAGCCTGAAGATTTTGCAACTTATTACTGTCTACAGTATAACAGTGACCCTCC	DIQMTQSPSSLSASVGDRVTITCRASQGISTYLNWYQQKPGKAPKRLIYAASSLESGVPSRFSGSGSGTDFTLTISSLQPEDFATYYCLQYNSDP
IGKV1-46*01_S1004_kim	GACATCCAGATGACCCAGTCTCCATCCTCCCTGTCTGCATCTGTAGGAGACAGTGTCACCATCACTTGCCGGGCAAGTCAGAGCTTTAGTAGTAGTTTAGCCTGGTATCAGCAGAAACCAGGGAAAGCCCCTAAGCTCCTGATCTATAGTGCATCCAGTTTGCAATCTGGGGTTCCTTCGAGGTTCAGTGGCAGTAAGTCTGGGACAGATTTCACTCTCACCATCAGCAGCCTGCAGCCTGAAGATATTGCTAGTTATTACTGTCAACAGTATTACAGTTACCCTCC	DIQMTQSPSSLSASVGDSVTITCRASQSFSSSLAWYQQKPGKAPKLLIYSASSLQSGVPSRFSGSKSGTDFTLTISSLQPEDIASYYCQQYYSYP
IGKV1-46*01_kim	GACATCCAGATGACCCAGTCTCCATCCTCCCTGTCTGCATCTGTAGGAGACAGTGTCACCATCACTTGCCGGGCAAGTCAGAGCTTTAGTAGTAGTTTAGCCTGGTATCAGCAGAAACCAGGGAAAGCCCCTAAGCTCCTGATCTATAGTGCATCCAGTTTGCAATCTGGGGTTCCTTCGAGGTTCAGTGGCAGTAAGTCTGGGACAGATTTCACTCTCACCATCAGCAGCCTGCAGCCTGAAGATATTGCTAGTTATTACTGTCAACAGTATTACAGTGACCCTCC	DIQMTQSPSSLSASVGDSVTITCRASQSFSSSLAWYQQKPGKAPKLLIYSASSLQSGVPSRFSGSKSGTDFTLTISSLQPEDIASYYCQQYYSDP
IGKV1-59*02_S1910_kim	GCCATCCAGATGACCCAGTCTCCATCCTCCCTGTCTGCATCTGTAGGAGACAAAGTCACCATCACTTGCCGGGCGAGTCAGAGCATTGGTAGTAATTTAGCCTGGTATCAGCAGAAACCAGGGAAAGTTCCTAAGCTCCTGATCTATGCTGCATCCACTTTGCAATCAGAGGTCCCATCTCGGTTCAGCGGCAGTGGATCTGGGACAGATTTCACTCTCACCATCAGCAGCCTGCAACCTGAGGATGTTGCAACTTATTACTGTCAAAAGTGTGACAGTGCCCCTCC	AIQMTQSPSSLSASVGDKVTITCRASQSIGSNLAWYQQKPGKVPKLLIYAASTLQSEVPSRFSGSGSGTDFTLTISSLQPEDVATYYCQKCDSAP
IGKV1-66*01_S1426_kim	GACATCCAGATGACGCAGTCTCCATCCTCCCTGTCTGCATCTGTAGGAGACAGAGTCACCATCACTTGCCGGGCGAGTCAGGGCATTAACAATTATTTAAGTTGGTATCAGCAGAAACCAGGGAAAGCCCCTAAGCCCCTGATCTATTATGCATCCAGTTTGGAAACAGGGGTACCATCAAGGTTCAGTGGAAGTAGATCTGGGACAGATTATACTCTCACCATCAGCAGTCTGCAGCCTGAAGATATTGCAACATATTACTGTCAACAGTATAATAATTCCCCTCC	DIQMTQSPSSLSASVGDRVTITCRASQGINNYLSWYQQKPGKAPKPLIYYASSLETGVPSRFSGSRSGTDYTLTISSLQPEDIATYYCQQYNNSP
IGKV1-66*01_S2281_kim	GACATCCAGATGACGCAGTCTCCATCCTCCCTGTCTGCATCTGTAGGAGACAGAGTCACCATCACTTGCCGGGCGAGTCAGGGCATTAACCATTATTTAAGTTGGTATCAGCAGAAACCAGGGAAAGCCCCTAAGCCCCTGATCTATTATGCATCCAGTTTGGAAACAGGGGTCCCATCAAGGTTCAGTGGAAGTGGATCTGGGACAGATTATACTCTCACCATCAGCAGTCTGCAGCCTGAAGATATTGCAACATATTACTGTCAACAGTATAATAATTCCCCTCC	DIQMTQSPSSLSASVGDRVTITCRASQGINHYLSWYQQKPGKAPKPLIYYASSLETGVPSRFSGSGSGTDYTLTISSLQPEDIATYYCQQYNNSP
IGKV1-69*01_S0535	GACATCCAGATGACCCAGTCTCCATCCTCCCTGTCTGTATATGTGGGAGACAGAGTCACCCTCACTTGCAGAGCCAGTCAGGGTATCAGCAACTCGTTGGCCTGGTATCAACAGAAACCAGGGAAAGCCCCTAAGCTCCTAATCTATAGGGCATCCAATTTGGAAACAGGGGTCCCATCAAGGTTCAGTGGAAGTGGATCTGGGACAGATTTCACTCTCACCATCAGCAGCCTGCAGCCTGAAGACATCGCAACATATTACTGTCAACAGCATAATAATTCCCCTCC	DIQMTQSPSSLSVYVGDRVTLTCRASQGISNSLAWYQQKPGKAPKLLIYRASNLETGVPSRFSGSGSGTDFTLTISSLQPEDIATYYCQQHNNSP
IGKV1-69*01_S8777_kim	GACATCCAGATGACCCAGTCTCCATCCTCCCTGTCTGCATCTGTAGGAGACACAGTCACCATCACTTGCAGAGCCAGTCAGGGTATTAGCAACTGGTTGGCCTGGTATCAACAGAAACCAGGGAAAGCCCCTAAGCTCCTGATCTATAGGGCATCCAATTTGGAAACAGGGGTCCCATCAAGGTTCAGTGGAAGTGGATCTGGGACAGATTTCACTCTCACCATCAGCAGCCTGCAGCCTGAAGATATCGCAACATATTACTGTCAACAGCATGATAATTCCCCTCC	DIQMTQSPSSLSASVGDTVTITCRASQGISNWLAWYQQKPGKAPKLLIYRASNLETGVPSRFSGSGSGTDFTLTISSLQPEDIATYYCQQHDNSP
IGKV1-69*01_kim	GACATCCAGATGACCCAGTCTCCATCCTCCCTGTCTGCATCTGTAGGAGACAGAGTCACCATCACTTGCAGAGCCAGTCAGGGTATTAGCAACTGGTTGGCCTGGTATCAACAGAAACCAGGGAAAGCCCCTAAGCTCCTGATCTATAGGGCATCCAATTTGGAAACAGGGGTCCCATCAAGGTTCAGTGGAAGTGGATCTGGGACAGATTTCACTCTCACCATCAGCAGCCTGCAGCCTGAAGATATCGCAACATATTACTGTCAACAGCATGATAATTCCCCTCC	DIQMTQSPSSLSASVGDRVTITCRASQGISNWLAWYQQKPGKAPKLLIYRASNLETGVPSRFSGSGSGTDFTLTISSLQPEDIATYYCQQHDNSP
IGKV1-74*01_S5641_kim	GACATCCAGATGACCCAGTCTCCATCCTCCCTGTCTGCATCTGTAGGAGACAGAGTCACCATCTCTTGCCGGGCAAGTCAGAACATTTATAGTAATTTAGCGTGGTATCAGCAGAAACCAGGGAAAACTCCTAAGCTCCTGATCTATGCTGCATCCAGTTTGCAAAGTGGGATTCCCTCTCGGTTCAGCGGCAGTGGATCTGGGACAGATTACACTCTCACCATCAGCAGCCTGCAGCCTGAAGATGTTGCAACTTATTACTGTCAGCATGGTTATGGTACCCCTCC	DIQMTQSPSSLSASVGDRVTISCRASQNIYSNLAWYQQKPGKTPKLLIYAASSLQSGIPSRFSGSGSGTDYTLTISSLQPEDVATYYCQHGYGTP
IGKV1-80*01_S1234_kim	GCCATCCAGATGACCCAGTCTCCATCCTCCCCGTCTGCAACTGTAGGAGACAGAGTCACCATCACTTGCCGTGTGAGTCAGAACATTAACAATAATTTAGCCTGGTATCAGCAGAAACCAGGGAAAACTCCTAAGCTTCTGCATCCAGTTTTCAAACTGGGATTCCCTCTCGGTTCAGCGGCAGTGGATCTGGGACGGATTACACTCTCACCATCGGCAGCCTGCAGCCTGAAGATGTTGCAACTTATTTCTGTCAACATGGTTATAGTTACCCTCC	AIQMTQSPSSPSATVGDRVTITCRVSQNINNNLAWYQQKPGKTPKLLHPVFKLGFPLGSAAVDLGRITLSPSAACSLKMLQLISVNMVIVTL
IGKV1-80*01_S2390	GCCATCCAGATGACCCAGTCTCCATCCTCCCCGTCTGCAACTGTAGGAGACAGAGTCACCACTACTTGCCGTGTGAGTCAGAACATTAACAATAATTTAGCCTGGTATCAGCAGAAACCAGGGAAAACTCCTAAGCTTCTGCATCCAGTTTTCAAACTGGGATTCCCTCTCAGTTCAGCGGCAGTGGATCTGGGACGGATTACACTCTCACCATCGGCAGCCTGCAGCCTGAAGATGTTGCAACTTATTTCTGTCAACATGGTTATAGTTACACTCC	AIQMTQSPSSPSATVGDRVTTTCRVSQNINNNLAWYQQKPGKTPKLLHPVFKLGFPLSSAAVDLGRITLSPSAACSLKMLQLISVNMVIVTL
IGKV1-94*01_S0326_kim	GACATCCAGATGACCCAGTCTCCATCCTCCCTGTCTGCATCTGTAGGAGACAGAGTCACCGTCACTTGCCGGGCGAGTCAAGGCATTAACAAGGAGTTAAGCTGGTATCAGCAGAAACCAGGGAAAGCCCCTACACTCCTGATCTATGCTGCATCCAGTTTGCAGACGGGGGTCTCATCTCGGTTCAGTGGCAGTGGATCTGGGACAGATTACACTCTCACCATCAGCAGCCTGCAGCCTGAAGATGTTGCAACTTATTACTGTCTACAGGATTATACTACTCCGTC	DIQMTQSPSSLSASVGDRVTVTCRASQGINKELSWYQQKPGKAPTLLIYAASSLQTGVSSRFSGSGSGTDYTLTISSLQPEDVATYYCLQDYTTP
IGKV1-94*01_S1238_kim	GACATCCAGATGACCCAGTCTCCATCCTCCCTGTCTGCATCTGTAGGAGACACAGTCACCATCACTTGCCGGGCGAGTCAAGGCATTAACAAGGAGTTAGACTGGTATCAGCAGAAACCAGGGAAAGCCCCTACACTCCTGATCTATGCTGCCTCCAGTTTGCAGACGGGGGTCTCATCTCGGTTCAGCGGCAGTGGATCTGGGACAGATTTCACTCTCACCATCAGCAGCCTGCAGCCTGAAGATGTTGCAACTTATTACTGTCAACAGGATTATAATACCCCGTC	DIQMTQSPSSLSASVGDTVTITCRASQGINKELDWYQQKPGKAPTLLIYAASSLQTGVSSRFSGSGSGTDFTLTISSLQPEDVATYYCQQDYNTP
IGKV1-NL_10*01_S6496	GACATCCAGATGACCCAGTCTCCATCCTCCCTGTCTGCATCTGTAGGAGACAGAGTCACCATCACTTGCCAGGCGAGTCAGGGCATTAGCAATAATTTAGCCTGGTATCAGCAGAAACCAGGGAAAGCCCCTAAGCTCCTGATCTATAAGGCATCCACTTTGCAAAGTGGGGTCCCCTCAAGGTTCAGCGGCAGTGGATCTGGGACAGATTTCACTCTCACCATCAGCAGCCTGCAGCCTGAAGATTTTGCAACTTATTACTGTCAGCATGGTTATGGTATCCTC	DIQMTQSPSSLSASVGDRVTITCQASQGISNNLAWYQQKPGKAPKLLIYKASTLQSGVPSRFSGSGSGTDFTLTISSLQPEDFATYYCQHGYGIL
IGKV1-NL_11*03_S6920_kim	GACATCCAGATGACTCAGTCTCCATCTTCCCTGTCTGCATCTGTAGGAGACACTGTCACCATCACTTGCCGGGCAAGTCAGGGTATTAGCAGTTATTTAAATTGGTTTCAGCAGAAACCAGGGAAAGCCCCTAAGCTCCTGATCTATGATGCATCCAGTTTGGAAAGTGGGGTCCCATCAAGGTTCAGCGGCAGTGGATCTGGGACAGATTTCACTCTCACCATCAGCAGCCTGCAGCCTGAAGATTTCGCAGCTTATTACTGTCTACAGCATAATAGTTACCCTCC	DIQMTQSPSSLSASVGDTVTITCRASQGISSYLNWFQQKPGKAPKLLIYDASSLESGVPSRFSGSGSGTDFTLTISSLQPEDFAAYYCLQHNSYP
IGKV1-NL_12*01_S0682_kim	GACATTCAGATGACCCAGTCTCCATCCTCCCTGTCTGCTTCTGTAGGAGACAGAGTCACCATCACTTGCCGGGCAAGTCAGGGCATTAGCAGTTATTTAAATTGGTATCAGCAGAAACCAGGGAAAGCCCCTAAGCTCCTGATCTATTATGCAAACCGTTTGGAAAGTGGGGTCCCATCAAGGTTCAGCGGCAGTGGATCTGGGACAGAATTCACTCTCACCGTCAGCAGCCTGCAACCTGAGGATTTTGCAACTTATTACTGTCAACAGTATAATAGTTTACCTCC	DIQMTQSPSSLSASVGDRVTITCRASQGISSYLNWYQQKPGKAPKLLIYYANRLESGVPSRFSGSGSGTEFTLTVSSLQPEDFATYYCQQYNSLP
IGKV1-NL_12*01_kim	GACATTCAGATGACCCAGTCTCCATCCTCCCTGTCTGCTTCTGTAGGAGACAGAGTCACCATCACTTGCCGGGCAAGTCAGGGCATTAGCAGTTATTTAAATTGGTATCAGCAGAAACCGGGGAAAGCCCCTAAGCTCCTGATCTATTATGCAAACCGTTTGGAAAGTGGGGTCCCATCAAGGTTCAGCGGCAGTGGATCTGGGACAGAATTCACTCTCACCATCAGCAGCCTGCAACCTGAGGATTTTGCAACTTATTACTGTCAACAGTATAATAGTTTACCTCC	DIQMTQSPSSLSASVGDRVTITCRASQGISSYLNWYQQKPGKAPKLLIYYANRLESGVPSRFSGSGSGTEFTLTISSLQPEDFATYYCQQYNSLP
IGKV1-NL_14*03_S4994	GACATCCAGATGACCCAGTCTCCATCTTCCCTGTCTGCATCTGTAGGAGACAGAGTCACCATCACTTGCAGGGCAAGTCAGGGCATTAGCAATTATTTAAGTTGGTATCAGCAGAAACCAGGAAAAGCTCCTAAGCTCCTGATCTATGCTGCATCCAGTTTGCAAAGTGGGGTCCCATCAAGGTTCAGCGGCAGTGGATCTGGGACAGATTTCACTCTCACCATCAGCAGCCTGCAGCCTGAAGATTTTGCAGCTTATTACTGTCAACAGCATAATAGTAACCCTCC	DIQMTQSPSSLSASVGDRVTITCRASQGISNYLSWYQQKPGKAPKLLIYAASSLQSGVPSRFSGSGSGTDFTLTISSLQPEDFAAYYCQQHNSNP
IGKV1-NL_15*01_S8599_kim	GATATCCAGATGACCCAGTCTCCATCTGCCTTGTCTGCATCTGTAGGAGACAGAGTCACCATCTCTTGCCGGGCAAGTCAGAACATTTATAGTAATTTAGCTTGGTATCAGCAGAAACCAGGGAAAGCCCCTAAGCTCCTGATCTATGCTGCATCCAGATTGCAAAGTGGGATTCCCTCTCGGTTCAGCGGCAGTGGATCTGGGACAGATTTCACTCTCACCATCAGCAGCCTGCAGCCTGAAGATTCTGCAGCTTATTACTGTCAACAGGTTTATAGTAACCCTCC	DIQMTQSPSALSASVGDRVTISCRASQNIYSNLAWYQQKPGKAPKLLIYAASRLQSGIPSRFSGSGSGTDFTLTISSLQPEDSAAYYCQQVYSNP
IGKV1-NL_15*03_S0727_kim	GATATCCAGATGACCCAGTCTCCATCTGCCTTGTCTGCATCTGTAGGAGACAGAGTCACCATCTCTTGCCGGGCAAGTCAGAACATTTATAGTGGTTTAGCGTGGTATCAGCAGAAACCAGGGAAAGCCCCTAAGCTCCTGATCTATGCTGCATCCAGATTGCAAAGTGGGATTCCCTCTCGGTTCAGCGGCAGTGGATCTGGGACAGATTTCACTCTCACCATCAGCAGCCTGCAGCCTGAAGATTCTGCAGCTTATTACTGTCAACAGGTTTATAGTACCCCTCC	DIQMTQSPSALSASVGDRVTISCRASQNIYSGLAWYQQKPGKAPKLLIYAASRLQSGIPSRFSGSGSGTDFTLTISSLQPEDSAAYYCQQVYSTP
IGKV1-NL_16*01_S1046_kim	GACATCCAGATGACCCAGTCTCCATCCTCCCTGTCTGCATCTGTAGGAGACAGAGTCACCATCACTTGCAGGGCAAGTGAGAACGTTAACAACTATTTACATTGGTATCAGCAGAAACCAGGGAAAGCCCCTAAGCTCCTGATCTATGCTGCATCCACTTTGCAAAGTGGGGTCCCATCAAGGTTCAGCGGCAGTGGATCTGGGACAGATTTCACTCTCACCATCAGCAGCCTGCAGCCTGAAGATGTTGCAACTTATTACTGTCAGCATAGTTATGGTACCCCTCC	DIQMTQSPSSLSASVGDRVTITCRASENVNNYLHWYQQKPGKAPKLLIYAASTLQSGVPSRFSGSGSGTDFTLTISSLQPEDVATYYCQHSYGTP
IGKV1-NL_17*01_S2173_kim	GACATCCAGATGACTCAGTCTCCATCCTCCCTGTCTGCATCTGTAGGAGACACAGTCACCATCACTTGCAGGGCGAGTCAGGGCATTAGCAATAATTTAGCCTGGTATCAGCAGAAACCGGGGAAAGTCCCTAAGCTCCTGATCTATTATGCATCCACTTTGCAAAGTGGGGTCCCATCAAGGTTCAGCGGCAGTGGATCTGGGACAGATTTCACTCTCACCATCAGCAGCCTGCAGCCTGAAGATTTTGCAACTTATTACTGTCAGCATGGTTATGGTACCCCTCC	DIQMTQSPSSLSASVGDTVTITCRASQGISNNLAWYQQKPGKVPKLLIYYASTLQSGVPSRFSGSGSGTDFTLTISSLQPEDFATYYCQHGYGTP
IGKV1-NL_19*01_S4354_kim	GACATCCAGATGACCCAGTCTCCATCCTCCCTGTCTGCATCTGTGGGAGACAGAGTCACCATCACTTGTCGGGCAAGTCAGGGCATTAGCAATAATTTAGCCTGGTATCAGCAGAAACCAGGGAAAGCCCCTAAGCCCCTGATCTATAAGGCATCCAGTTTGGAAAGTGGGGTCCCATCAAGGTTCAGCGGCAGTGGATCTGGGACAGATTTCACTCTCACCATCAGCAGCCTGCAGCCTGAAGATTTTGCAGTTTATTACTGTCAACAGTATAATAGTAACCCTCC	DIQMTQSPSSLSASVGDRVTITCRASQGISNNLAWYQQKPGKAPKPLIYKASSLESGVPSRFSGSGSGTDFTLTISSLQPEDFAVYYCQQYNSNP
IGKV1-NL_20*01_S2856	GACATCCAGATGACCCAGTCTCCGTCCTCCCTGTCTGCATCTGTAGGAGACAGAGTCACCATCACTTGCAGAGCCAGTCAGGGTATTAGCAACTGGTTAGCCTGGTATCAGCAGAAACCAGGGAAAGCCCCTAAGCTCCTGATCTATAAGGCATCCACTTTGCAAAGTGGGGTCCCATCAAGGTTCAGCGGCAGTGGATCTGGGACAGATTTCACTCTCACCATCAGCAGCCTGCAGCCTGAAGATTTTGCAACTTATTACTGTCAACAGCATAATAGTAACCCTCC	DIQMTQSPSSLSASVGDRVTITCRASQGISNWLAWYQQKPGKAPKLLIYKASTLQSGVPSRFSGSGSGTDFTLTISSLQPEDFATYYCQQHNSNP
IGKV1-NL_22*01_S5847	GACATCCAGATGACCCAGTCTCCATCCTCTCTGTCTGCATCTGTAGGAGACAGCGTGACCATTACTTGCCAGGCGAGTCAAAGCCTTAGCAATTATTTAAATTGGTATCAGCAGAAACCAGGGAAAATTCCTAAGCTCCTGATCTATAGGGCATCCAGTTTGCAAAGTGGAATTCCCTCTCGGTTCAGCGGCAGTGGATCTGGGACGGATTTCACTCTCACCATCAGCAGCCTGCAGCCTGAAGATTTTGCCACTTATTACTGTCAACAGGGTTATAGTTACCCTCC	DIQMTQSPSSLSASVGDSVTITCQASQSLSNYLNWYQQKPGKIPKLLIYRASSLQSGIPSRFSGSGSGTDFTLTISSLQPEDFATYYCQQGYSYP
IGKV1-NL_4*01_S4157_kim	GACATCCAGATGACCCAGTCTCCATCCTCCCTGTCTGCATCTGTAGGAGACACAGTCACCATCACTTGCCGGGCGAGTCAGAGTATTAGCAGCTGGTTAGCCTGGTATCAGCAGAAACCAGGGAAAGCCCCTAAGCTCCTGATCTATAAGGCGTCCAGTTTGCAAAGTGGGGTCCCATCAAGGTTCAGCGGCAGTGGATCTGGGACAGATTTCACTCTCACCATCAGCAGCCTGCAGTCTGAAGATTTTGCAACTTATTACTGTCAACAGTATAGCAGTAGCCCTCC	DIQMTQSPSSLSASVGDTVTITCRASQSISSWLAWYQQKPGKAPKLLIYKASSLQSGVPSRFSGSGSGTDFTLTISSLQSEDFATYYCQQYSSSP
IGKV1-NL_4*01_S8027_kim	GACATCCAGATGACCCAGTCTCCATCCTCCCTGTCTGCATCTGTAGGAGACACAGTCACCATCACTTGCCGGGCGAGTCAGAGTATTAGCAGCTGGTTAGCCTGGTATCAGCAGAAACCAGGGAAAGCCCCTAAGCTCCTGATCTATAAGGCATCCAGTTTGCAAAGTGGGGTCCCATCAAGGTTCAGCGGCAGTGGATCTGGGACAGATTTCACTCTCACCATCAGCAGCCTGCAGTCTGAAGATTTTGCAACTTATTACTGTCAACAGTATAGCAGTAGCCCTCC	DIQMTQSPSSLSASVGDTVTITCRASQSISSWLAWYQQKPGKAPKLLIYKASSLQSGVPSRFSGSGSGTDFTLTISSLQSEDFATYYCQQYSSSP
IGKV1S14*01_S7261	GACATCCAGATGACCCAGTCTCCATCCTCCCTGTCTGCATCTGTAGGAGACACAGTCACCATCACTTGTCGGGCAAGTCAGGGCATTAGCAATTATTTAGCCTGGTATCAGCAGAAACCAGGGAAAGCCCCGAAGCCCCTGATCTATTACGCATCCAATTTGGAAAGTGGGGTCCCATCAAGGTTCAGCGGCAGTGGATCTGGGACAGATTTCACTCTCACCATCAGCAGCCTGCAGTCTGAAGATTTTGCAATTTATTACTGTCAACAGCATAATAGTCACCCTCC	DIQMTQSPSSLSASVGDTVTITCRASQGISNYLAWYQQKPGKAPKPLIYYASNLESGVPSRFSGSGSGTDFTLTISSLQSEDFAIYYCQQHNSHP
IGKV1S14*01_S7871_kim	GACATCCAGATGACCCAGTCTCCATCCTCCCTGTCTGCATCTGTAGGAGACACAGTCACCATCACTTGTCGGGCAAGTCAGGGCATTAGCAATTATTTAGCCTGGTATCAGCAGAAACCAGGGAAAGCCCCGAAGCCCCTGATCTATTACGCATCCAATTTGGAAAGTGGGGTCCCATCAAGGTTCAGCGGCAGTGGATCTGGGACAGATTTCACTCTCACCATCAGCAGCCTGCAGCCTGAAGATTTTGCAATTTATTACTGTCAACAGCATAATAGTTACCCTCC	DIQMTQSPSSLSASVGDTVTITCRASQGISNYLAWYQQKPGKAPKPLIYYASNLESGVPSRFSGSGSGTDFTLTISSLQPEDFAIYYCQQHNSYP
IGKV1S5*01_S9619_kim	GACATCCAGATGACCCAGTCTCCATCTTCCTTATCTGCATCTGTAGGAGACAGAGTCACCATCACTTGTCGGGCTAGTCAGACCATTAGCAGTTATTTAGCCTGGTATCAGCAGAAACCAGGGAAAGTCCCTAAGCTCCTGATCTATGCTGCATCCAGTTTGGAAAGTGGGGTCCCATCAAGGTTCAGCGGCAGTGGATCTGGGACAGATTTCACTCTCACCATCAGCAGCCTGCAGCCTGAAGATTTTGCAACTTATTACTGTCAACAGCATAATAGTCACCCTCC	DIQMTQSPSSLSASVGDRVTITCRASQTISSYLAWYQQKPGKVPKLLIYAASSLESGVPSRFSGSGSGTDFTLTISSLQPEDFATYYCQQHNSHP
IGKV1S6*01_S3698_kim	GACATCCAGATGACCCAGTCTCCATCTTCCTTGTCTGCATCTGTAGGAGACAGAGTCACCATCACTTGCCAAGCCAGTCAGGGTATTAGCAACTGGTTAGCCTGGTATCAGCAGAAACCAGGGAAAGCCCCTAAGCGCCTGATCTATGCTGCATCCAGTTTGGAAAGCGGGGTCCCATCAAGGTTCAGCGGCAGTGGATCTGGGACAGAATTCACTCTCACCATCAGCAGCCTGCAGCCTGAAGATTTTGCAACTTATTACTGTCAGCAGCATAATAGTTACCCTCC	DIQMTQSPSSLSASVGDRVTITCQASQGISNWLAWYQQKPGKAPKRLIYAASSLESGVPSRFSGSGSGTEFTLTISSLQPEDFATYYCQQHNSYP
IGKV1S6*02_S0963	GACATCCAGATGACCCAGTCTCCATCTTCCTTGTCTGCATCTGTAGGAGACAGAGTCACCATCACTTGCCAAGCCAGTCAGGGTATTAGCAACTGGTTAGCCTGGTATCAGCAGAAACCAGGGAAAGCCCCTAAGCTCCTGATCTATGCTGCATCCAGTTTGCAAAGTGGGGTCCCATCAAGGTTCAGCGGCAGTGGATCTGGGACAGATTTCACTCTCACCATCAGCAGCCTGCAGCCTGAAGATTCTGAAGCTTATTACTGTCAGCAGCATAATAGTCACCCTCC	DIQMTQSPSSLSASVGDRVTITCQASQGISNWLAWYQQKPGKAPKLLIYAASSLQSGVPSRFSGSGSGTDFTLTISSLQPEDSEAYYCQQHNSHP
IGKV2-60*01_S2760	GATATCGTGATGACCCAGACTCCACTCTCCCTGCCCGTCACCCTTGGAGAGTCGGCCTCCATCTCCTGCAGGTCTAGTCAGAGCCTTCTGAGTAGTAATGGATACAACTATTTGAATTGGTACCTGCAGAAGCCAGGCCAGTCTCCACAGCTCCTGATCTATTATGGTTCTAATCGGGCCTCCGGGGTCCCCGACAGGTTCAGTGGCAGTGGGTCAGGCACAGATTTTACACTGAAAATCAGCAGGGTGGAGGCTGAGGACGTAGGGGTTTATTACTGCATGCAAGCTCTACAAACTCCTCC	DIVMTQTPLSLPVTLGESASISCRSSQSLLSSNGYNYLNWYLQKPGQSPQLLIYYGSNRASGVPDRFSGSGSGTDFTLKISRVEAEDVGVYYCMQALQTP
IGKV2-60*02_kim	GATATCGTGATGACCCAGACTCCACTCTCGCTGCCCGTCACCCTTGGAGAGCCAGCCTCCATCTCCTGCAGGTCTAGTCAGAGCCTTCTGAGTAGTAATGGATACAACTATTTGAATTGGTACCTGCAGAAGCCAGGCCAGTCTCCACAGCTCCTGATCTATTATGGTTCTAATCGGGCCTCCGGGGTCCCCGACAGGTTCAGTGGCAGTGGGTCAGGCACAGATTTTACACTGAAAATCAGCAGGGTGGAGGCTGAGGACGTAGGGGTTTATTACTGCATGCAAGCTCTACAAACTCCTCC	DIVMTQTPLSLPVTLGEPASISCRSSQSLLSSNGYNYLNWYLQKPGQSPQLLIYYGSNRASGVPDRFSGSGSGTDFTLKISRVEAEDVGVYYCMQALQTP
IGKV2-61*01_S4749_kim	GATATTGTGATGACCCAGACTCCACTCTCCCTGCCAGTCACCCCTGGAGAGCCGGCCTCCATCTCCTGCAGGTCTAGTCAGAGCCTCCTGCATACTGATGGATATACCTATTTGGATTGGTACCTGCAGAAGCCAGGCCAGTCTCCGCAGCTCCTGATTTATGGGGGTTCCAACAGAGCCTCTGGAGTCCCAGACAGGTTCAGTGGCAGTGGGTCAGGCACTGATTTCACACTGAAAATCAGCAAGGTGGAGGCTGAGGATGTTGGGGTTTATTACTGCATGCAACATATAGCGCTTCCTCC	DIVMTQTPLSLPVTPGEPASISCRSSQSLLHTDGYTYLDWYLQKPGQSPQLLIYGGSNRASGVPDRFSGSGSGTDFTLKISKVEAEDVGVYYCMQHIALP
IGKV2-61*01_kim	GATATTGTGATGACCCAGACTCCACTCTCCCTGCCAGTCACCCCTGGAGAGCCGGCCTCCATCTCCTGCAGGTCTAGTCAGAGCCTCCTGCATACTGATGGATATACCTATTTGGATTGGTACCTGCAGAAGCCAGGCCAGTCTCCGCAGCTCCTGATTTATGGGGGTTCCAACAGAGCCTCTGGAGTCCCAGACAGGTTCAGTGGCAGTGGGTCAGGCACTGATTTCACACTGAAAATCAGCAAGGTGGAGGCGGAGGATGTTGGGGTTTATTACTGCATGCAACATAAAGCGCTTCCTCC	DIVMTQTPLSLPVTPGEPASISCRSSQSLLHTDGYTYLDWYLQKPGQSPQLLIYGGSNRASGVPDRFSGSGSGTDFTLKISKVEAEDVGVYYCMQHKALP
IGKV2-62*02_S9986_kim	GATGTTGTGATGACTCAGTCTCCACTCTCCCTGCCCATCACCCCTGGACAGCCGGCCTCCATCTCCTGCAGGTCTAGTCAGAGCCTTGTACACAGTGATGGAAACACCTACTTGAGTTGGTATCAGCAGAAGCCAGGCCAACCTCCAAGGCTCCTGATTTATAAGGTTTCTAACCGGTACTCTGGGGTCCCAGACAGATTCAGCGGCAGTGGGGCAGGGACAGATTTCACACTGAAAATCAGCAGAGTGGAGGCTGAGGATGTTGGGGTTTATTACTGCGGGCAAGGTACAAAGGTTCCTCC	DVVMTQSPLSLPITPGQPASISCRSSQSLVHSDGNTYLSWYQQKPGQPPRLLIYKVSNRYSGVPDRFSGSGAGTDFTLKISRVEAEDVGVYYCGQGTKVP
IGKV2-72*01_kim	GATATTGTGATGACCCAGACTCCACTCTCCCTGCCCATCACCCCTGGAGAGCCGGCCTCCATCTCCTGCAGGTCTAGTCAGAGCCTCCTGCATAGTAATGGAAACACCTATTTGCACTGGTACCTGCAGAAGCCAGGCCAGTCTCCGCAGCTCCTGATTTATGGGGGTTCCAACAGAGCCTCTGGAGTCCCAGACAGGTTCAGTGGCAGTGGGTCAGGCACTGATTTCACACTGAAAATCAGCAAGGTGGAGGCGGAGGATGTTGGGGTTTATTACTGCGTGCAAGCTATAGCGTTTCCTCC	DIVMTQTPLSLPITPGEPASISCRSSQSLLHSNGNTYLHWYLQKPGQSPQLLIYGGSNRASGVPDRFSGSGSGTDFTLKISKVEAEDVGVYYCVQAIAFP
IGKV2-72*01_kim_S5022	GATATTGTGATGACCCAGACTCCACTCTCCCTGCCCGTCACCCCTGGAGAGCCGGCGTCCATCTCCTGCAGGTCTAGTCAGAGCCTCCTGCATAGTAATGGAAACACCTATTTGCACTGGTACCTGCAGAAGCCAGGCCAGTCTCCGCAGCTCCTGATTTATGGGGGTTCCAAGCGGGCCTCTGGAGTCCCAGACAGGTTCAGTGGCAGTGGGTCAGGCACTGATTTCACACTGAAAATCAGCAAGGTGGAGGCGGAGGATGTTGGGGTTTATTACTGCGTGCAAGCTATAGCGTTTCCTCC	DIVMTQTPLSLPVTPGEPASISCRSSQSLLHSNGNTYLHWYLQKPGQSPQLLIYGGSKRASGVPDRFSGSGSGTDFTLKISKVEAEDVGVYYCVQAIAFP
IGKV2-78*01_S2947_kim	GATATAGTGATGACCCAGACTCCACTCTCCCTGCCCGTCACCCCTGGAGAGCCGGCCTCCATCTCCTGCAGGTCTAGTCAGAGCCTCCTGGATAGTTATGGATACACTCATTTGCATTGGTACCTGCAGAAGCCAGGCCAGTCTCCACAGCTCCTGATCTATTTGGGTTCCAACCGGGCCTCTGGAGTCCCAGACAGGTTCAGTGGCAGTGGGTCAGGCACTGATTTCACACTGAAAATCAGCAGGGTGGAGGCTGAGGATGTTGGGGTTTATTACTGCATGCAAACTCTACAAACTCCTCC	DIVMTQTPLSLPVTPGEPASISCRSSQSLLDSYGYTHLHWYLQKPGQSPQLLIYLGSNRASGVPDRFSGSGSGTDFTLKISRVEAEDVGVYYCMQTLQTP
IGKV2-78*01_S7588_kim	GATATAGTGATGACCCAGACTCCACTCTCCCTGCCCGTCACCCCTGGAGAGCCGGCCTCCATCTCCTGCAGGTCTAGTCAGAGCCTCCTGGATAGTTATGGATACACTCATTTGCACTGGTACCTGCAGAAGCCAGGCCAGTCTCCACAGCTCCTGATCTATTTGGGTTCCAACCGGGCCTCTGGAGTCCCAGACAGGTTCAGTGGCAGTGGGTCAGGCACTGATTTCACACTGAAAATCAGCAGGGTGGAGGCTGAGGATGTTGGGGTTTATTACTGCATGCAAACTCTACAAACTCCTCC	DIVMTQTPLSLPVTPGEPASISCRSSQSLLDSYGYTHLHWYLQKPGQSPQLLIYLGSNRASGVPDRFSGSGSGTDFTLKISRVEAEDVGVYYCMQTLQTP
IGKV2-82*02_kim	GATATTGTGATGATCCAGACTCCACTCTCCCTGCCCGTCACCCTTGGAGAGCCGGCCTCCATCTCCTGCAGGTCCAGTCAGAGCCTTGTATACAGTGATGGAAAAACCTATTTGTATTGGTACCTGCAGAAGCCAGGCCAGTCTCCACAGCTCCTGATGTATTTGGTTTCCAAACGGGCCTCTGGAGTCCCAGACAAGTTCAGTGGCAGTGGGTCAGGCACTGATTTCACACTGAAAATCAGCAGGGTGGAGGCTGAGGATGTTGGGGTTTATTACTGCATGCAAGCTCTACGGTCTCCTTC	DIVMIQTPLSLPVTLGEPASISCRSSQSLVYSDGKTYLYWYLQKPGQSPQLLMYLVSKRASGVPDKFSGSGSGTDFTLKISRVEAEDVGVYYCMQALRSP
IGKV2-NL_12*01_S9660_kim	GATGTTGTGATGACTCAGTCTCCACTCTCCCTGCCCATCACCCCTGGACAGCCGGCCTCCATCTCCTGCAGGTCTAGTCAAAGCCTTGTACACAGTAATGGAAACACCTACTTGAGTTGGTATCAGCAGAAGCCAGGCCAACCTCCAAGGCTCCTGATTTATAAGGTTTCTAACCGGGACTCTGGGGTCCCAGACAGATTCAGCGGCAGTGGGGCAGGGACAGATTTCACACTGAAAATCAGCAGAGTGGAGGCTGAGGATGTTGGGGTTTATTACTGCGGGCAAGGTACACACCTTCCTCC	DVVMTQSPLSLPITPGQPASISCRSSQSLVHSNGNTYLSWYQQKPGQPPRLLIYKVSNRDSGVPDRFSGSGAGTDFTLKISRVEAEDVGVYYCGQGTHLP
IGKV2-NL_13*01_S4447_kim	GATGTTGTGATGACTCAGTCTCCACTCTCCCTGCCCATCACCCCTGGACAGCCGGCCTCCATCTCCTGCAGGTCTAGTCAAAGCCTTGTACACAGTAATGGAAACACCTACTTGAGTTGGTATCAGCAGAAGCCAGGCCAACCTCCAAGGCTCCTGATTTATCAGGTTTCTAACCGGTACTCTGGGGTCCCAGACAGATTCAGCGGCAGTGGGGCAGGGACAGATTTCACACTGAAAATCAGCAGAGTGGAGGCTGAGGATGTTGGGGTTTATTACTGCGGGCAAGGTGCACACCTTCCTCC	DVVMTQSPLSLPITPGQPASISCRSSQSLVHSNGNTYLSWYQQKPGQPPRLLIYQVSNRYSGVPDRFSGSGAGTDFTLKISRVEAEDVGVYYCGQGAHLP
IGKV2-NL_3*01_S1264_kim	GATGTTGTGATGACTCAGTCTCCACTCTCCCTGCCCGTCACCCCTGGACAGCCGGCCTCGATCTCCTGCAGGTCTAGTCAGAGCCTCCTGCATAGTAATGGAAACACTTACTTGAGTTGGTTTCTGCAGAAGCCAGGCCAACCTCCAAGGCGCCTAATTTATAAGGTTTCTAACCGGGACTCTGGGGTCCCAGACAGATTCAGCGGCAGTGGGGCAGGGACAGATTTCACACTGAAAATCAGCAGAGTGGAGGCTGAGGATGTCGGGGTTTATTACTGCATGCAAGGTACACACTGGCCTCC	DVVMTQSPLSLPVTPGQPASISCRSSQSLLHSNGNTYLSWFLQKPGQPPRRLIYKVSNRDSGVPDRFSGSGAGTDFTLKISRVEAEDVGVYYCMQGTHWP
IGKV2-NL_5*01_S2137_kim	GGTGTTGTGATGACTCAGTCTCCACTCTCCCTGCCCATCACCCCTGGACAGCCGGCCTCCATCTCCTGCAGGTCTAGTCAAAGCCTTGTACACAGTGATGGGAAAACCTACTTGAATTGGTTACAGCAGAAGCCAGGCCAACCTCCAAGGCGCCTAATTTATCAGGTTTCTAACCGGGACTCTGGGGTCCCAGACAGATTCAGCGGCAGTGGGGCAGGGACAGATTTCACACTGAAAATCAGCAGAGTGGAGGCTGAGGATGTTGGAGTTTATTACTGCATGCAAGGTACACACCTTCCTCC	GVVMTQSPLSLPITPGQPASISCRSSQSLVHSDGKTYLNWLQQKPGQPPRRLIYQVSNRDSGVPDRFSGSGAGTDFTLKISRVEAEDVGVYYCMQGTHLP
IGKV2-NL_6*01_S2512_kim	GATATTGTGATGACCCAGACTCCACTCTCCCTATCCGTCACCCCTGGAGAGCCGGCTTCCATCTCCTGCAGGTCTAGTCAGAGCCTCCTGCATAGTAATGGGTACACCTATTTGCATTGGTACTTGCAGAAGCCAGGCCAGTCTCCACAGCTCCTGATCTATTTGGTTTCCAACCGGGCCTCTGGAGTCCCTGACAGGTTCAGTGGCAGTGGGTCAGGCACTGATTTCACACTGAAAATCAGCCGGGTGGAGGCTGAGGATGTTGGGGTTTATTACTGCGAGCAAACTCTACAAACTCCTCC	DIVMTQTPLSLSVTPGEPASISCRSSQSLLHSNGYTYLHWYLQKPGQSPQLLIYLVSNRASGVPDRFSGSGSGTDFTLKISRVEAEDVGVYYCEQTLQTP
IGKV2-NL_9*01_S6218_kim	GACATTGTGATGACCCAGACTCCACTCTCCCTGCCCGTCACCCCTGGAGAGCCGGCCTCCATCTCCTGCAGGTCTAGTCAGAGCCTCCTGCATAGTAATGGATACACCTATTTGTTTTGGTACCTGCAGAAGCCGGGCCAGTCTCCACAGCTCCTGATCTATTTGGTTTCCAACCGGGCCTCTGGAGTCCCTGACAGGTTCAGTGGCAGTGGGTCAGGCACTGATTTCACACTGAAAATCAGCCGGGTGGAGGCTGAGGATGTTGGGGTTTATTACTGCATGCAAGGTATACAGCTTCCTCC	DIVMTQTPLSLPVTPGEPASISCRSSQSLLHSNGYTYLFWYLQKPGQSPQLLIYLVSNRASGVPDRFSGSGSGTDFTLKISRVEAEDVGVYYCMQGIQLP
IGKV2S2*01_kim	GATATTGTGATGACCCAGACTCCACTCTCGCTGCCCGTCACCCCTGGAGAGCCGGCCTCCATCTCCTGCAGGTCTAGTCAGAGCCTTCTGCATAGTAATGGAAACACCTATTTGGATTGGTACCTGCAGAAGCCAGGCCAGTCTCCACGGCTCCTGATCTATAAAGTTACCAATCGGGAATCTGGGGTCCCAGACAGGTTCAGTGGCAGTGGGTCAGGCACAGATTTCACACTGAAAATCAGCAGGGTGGAGCCTGAGGATGTTGGTGTTTATTACTGCATGCAAAGTACAAAAGATCCCC	DIVMTQTPLSLPVTPGEPASISCRSSQSLLHSNGNTYLDWYLQKPGQSPRLLIYKVTNRESGVPDRFSGSGSGTDFTLKISRVEPEDVGVYYCMQSTKDP
IGKV2S20*02_S8364_kim	GATATTGTGATGACCCAGACTCCACTCTCCCTGCCCGTCACCCCTGGAGAGCCGGCCTCCATCTCCTGCAGGTCTAGTCAGAGCCTCTTGGATAGTGAGGATGGAAACACCTATTTGGATTGGTACCTGCAGAAGCCAGGCCAGTCTCCACAGCTCTTGATTTATGAGGTTTCCAACCGGGCCTCTGGAGTCCCAGACAGGTTCAGTGGCAGTGGGTCAGACACTGATTTCACACTGAAAATCAGCAGAGTGGAGGCTGAGGATGTTGGGGTTTATTACTGCATGCAAGCTCTAGAGTTTCCTCC	DIVMTQTPLSLPVTPGEPASISCRSSQSLLDSEDGNTYLDWYLQKPGQSPQLLIYEVSNRASGVPDRFSGSGSDTDFTLKISRVEAEDVGVYYCMQALEFP
IGKV2S20*02_S8954	GACATTGTGATGACCCAGACTCCACTCTCCCTGCCCGTCACCCTTGGAGAGCCGGCCTCCATCTCCTGCAGGTCTAGTCAGAGCCTCTTGGATAGTGAGGATGGAAACACCTATTTGGAATGGTACCTGCAGAAGCCAGGCCAGTCTCCACAGCTCTTGATTTATGAGGTTTCCAACCGGGCCTCTGGAGTCCCAGACAGGTTCAGTGGCAGTGGGTCAGACACTGATTTCACACTGAAAATCAGCAGAGTGGAGGCTGAGGATGTTGGGGTTTATTACTGCATGCAAGCTCTAGAGTTTCCTCC	DIVMTQTPLSLPVTLGEPASISCRSSQSLLDSEDGNTYLEWYLQKPGQSPQLLIYEVSNRASGVPDRFSGSGSDTDFTLKISRVEAEDVGVYYCMQALEFP
IGKV2S9*01_S9431	TTGTGATGACTCAGTCTCCACTCTCCCTGCCTGTCACTCTTGGACAGCCAGCCTCCATCTCCTGCAGGTCTAGTCAAAGCCTTGTACACAGTGATGGGAAAACCTACTTGAATTGGTTACAGCAGAAGCCAGGCCAACCTCCAAGGCGCCTAATTTATCAGGTTTCTAACCGGGACTCTGGGGTCCCAGACAGATTCAGCGGCAGTGGGGCAGGGACAGATTTCACACTGAAAATCAGCAGAGTGGAGGCTGAGGATGTTGGAGTTTATTACTGCATGCAAGGTACACACTGGCCTCC	L**LSLHSPCLSLLDSQPPSPAGLVKALYTVMGKPT*IGYSRSQANLQGA*FIRFLTGTLGSQTDSAAVGQGQISH*KSAEWRLRMLEFITACKVHTGL
IGKV3-10*02_kim	CAAGTTATATTGACACAGTCTCCAGCCACCCTGTCTTTGTCTCCAGGGGAAAGAGCCACTCTCTCCTGCAGGGCCAGTCAGAGTGTTAGCAGCTACTTAGCCTGGTACCAGCAGAAACCTGGGCAGGCTCCCAGGCTCCTCATCCACAGTGCGTCCAGCAGGGCCACTGGCATCCCAGACAGGTTCAGTGGCAGCGGGTCTGGGACAGAGTTCACCCTCACCATCAGCAGCCTGGAGCCTGAAGATGTTGGAGTTTATCACTGCTATCAGTATTACAGCGGGTACCC	QVILTQSPATLSLSPGERATLSCRASQSVSSYLAWYQQKPGQAPRLLIHSASSRATGIPDRFSGSGSGTEFTLTISSLEPEDVGVYHCYQYYSGY
IGKV3-12*01_S6375_kim	GAAATTGTGCTGACCCAGTCTCCAACATCCATGGCTGTCTCCCAAGGAGAAAGAGTCACCATCTCCTGCACGGCCAGCTCAAGTGTAAGCACCAGCTACTTGCACTGGTACCAACAGAAGCCAGGATTCCCTCCAAGGCTTCTTGTCTATAGAACATCAAGTCTGGCTTCTGGAGTCCCAGCCAGGTTCAGTGGCAGCGGTTCTGGGACCTCTTACACGCTCACAATCAGCAGCATGGAGGCTGAAGATGCTGCAAACTATTACTGTCAGCAGGGGAATAGCATTCCACC	EIVLTQSPTSMAVSQGERVTISCTASSSVSTSYLHWYQQKPGFPPRLLVYRTSSLASGVPARFSGSGSGTSYTLTISSMEAEDAANYYCQQGNSIP
IGKV3-12*02_kim	GAAATTGTGCTGACCCAGTCTCCAACATCCATGGCTGTCTCCCAAGGAGAAAGAGTCACCATCTCCTGCACGGCCAGCTCAAGTGTAAGCACCAGCTACTTGCACTGGTACCAACAGAAGCCAGGATTCCCTCCAAGGCTTCTTGTCTATAGAACATCAAGTCTGGCTTCTGGAGTCCCAGCCAGGTTCAGTGGCAGCGGTTCTGGGACCTCTTACACGCTCACAATCAGCAGCATGGAGGCTGAAGATGCTGCAAACTATTACTGTCAGCAGGAGAATAGCATTCCACC	EIVLTQSPTSMAVSQGERVTISCTASSSVSTSYLHWYQQKPGFPPRLLVYRTSSLASGVPARFSGSGSGTSYTLTISSMEAEDAANYYCQQENSIP
IGKV3-17*02_kim	GAAATAGTGATGACGCAGTCTCCAGCCACCCTGTCTTTGTCTCCAGGGGAAAGAGCCACCCTCTCCTGCAGGGCCAGTCAGAGTGTCAGCAGCAGGTTAGCCTGGTACCAGCAGAAACCTGGGCAAGCTCCCAGGCTCCTCATCTATGATGCATCCAGCAGGGTCACTGGTATCCCAGACAGGTTCAGTGGCAGCGGGTCTGGGACAGACTTCACTCTCACCATCAGCAGCCTGGAGCCTGAAGATGTTGCAGTTTATTTCTGTCAGCAGGAGAGTAACTGGTCTCA	EIVMTQSPATLSLSPGERATLSCRASQSVSSRLAWYQQKPGQAPRLLIYDASSRVTGIPDRFSGSGSGTDFTLTISSLEPEDVAVYFCQQESNWS
IGKV3-31*02_S3448_kim	GAAATTTTGATGACACAATCTCCAGCCACCTTGTCTTTGTCTCCAGGGGAAACAGCCACCATCTCCTGCAGGACCAGTCAGAGTGTTAGCAGCTACTTAGCCTGGTACCAGCAGAAACCTGGGCAGGCTCCCAGGCTCCTCATCTATGGTGCATCCAGCAGGGCCACTGGCATCCCAGACAGGTTCAGTGGCAGTGGGTCTGGGACAGACTTCACTCTCACCATCAGCAGCCTGGAGCCTGAAGATTTTGCAGTTTATTACTGTCAGGAGACTAGTAACTTATCTCC	EILMTQSPATLSLSPGETATISCRTSQSVSSYLAWYQQKPGQAPRLLIYGASSRATGIPDRFSGSGSGTDFTLTISSLEPEDFAVYYCQETSNLS
IGKV3-35*01_S6597	GAAATTGTAATGACGCAGTCTCCAGCCACCCTGTCTTTGTCTCCAGGAGAAAGAGCTACCCTCTCCTGCAGGGCCAGTCAGAGTGTCAGCAGCAACTTAGCCTGGTACCAGCAGAAACCTGGGCAAGCTCCCAGGCTCCTCATCTATTATGCATCCAACAGGGCCACTGGTATCCCAGACAGGTTCAGTGGCAGTGGGTCTGGGACAGACTTCACTCTCACCATCAGCAGCCTGGAGCCTGAAGATGTAGGAGTTTATTTCTGTCAGCAGGAGAGTAACTGGCCTCA	EIVMTQSPATLSLSPGERATLSCRASQSVSSNLAWYQQKPGQAPRLLIYYASNRATGIPDRFSGSGSGTDFTLTISSLEPEDVGVYFCQQESNWP
IGKV3-40*01_S1234_kim	GAAATTGTAATGACGCAGTCTCCAGCCACCCTGTCTTTGTCTCCAGGGGAAACAGCCACCCTCTCCTGCAGGGCCAGTGAGAGTGTTGGCAGCTACTTAGCCTGGTACCAGCAGAAACCTGGGCAGGCTCCCAAGCTCCTCGTCCGTAGTGCATACTTCAGGGCCACTGGCATCCCAGACAGGTTCAGTGGCAGCGGGTCTAGGACAGACTTCACTCTCACCATTAGCAGCCTGGAGCCTGAAGATGTTGGAGTTTATCACTGTCAGCAGTATAATGACTTGCTTCC	EIVMTQSPATLSLSPGETATLSCRASESVGSYLAWYQQKPGQAPKLLVRSAYFRATGIPDRFSGSGSRTDFTLTISSLEPEDVGVYHCQQYNDLL
IGKV3-40*03_S0654_kim	GAAATTGTAATGACGCAGTCTCCAGCCACCCTGTCTTTGTCTCCAGGGGAAACAGCCACCCTCTCCTGCAGGGCCAGTGAGAGTGTTGGCAGCTACTTAGCCTGGTACCAGCAGAAACCTGGGCAGGCTCCCAGGCTCCTCGTCCATAGTGCATACTTCAGGGCCACTGGCATCCCAGACAGGTTCAGTGGCAGCGGGTCTAGGACAGAGTTCACTCTCACCATTAGCAGCCTGGAGCCTGAAGATGTTGGAGTTTATCACTGTCAGCAGTATAATGACTTGCTTCC	EIVMTQSPATLSLSPGETATLSCRASESVGSYLAWYQQKPGQAPRLLVHSAYFRATGIPDRFSGSGSRTEFTLTISSLEPEDVGVYHCQQYNDLL
IGKV3-42*01_S4597	GAAATAGTGATGACGCAGTCTCCAGCCACCCTGTCTTTGTCTCCAGGAGAAAGAGCCACCCTCTCCTGCAGGGCCAGTCAGAGTGTCAGCAGCAGCTTAGCCTGGTACCAGCAGAAACCTGGGCAGGCTCCCAGGCTCCTCATCTATGGTGCATCCAGCAGGGCCACTGGCATCCCAGACAGGTTCAGTGGCAGTGGGTCTGGGACAGACTTCACTCTCACCATCAGCAGCCTGGAGCCTGAAGATTTTGCAGTTTATTATTGTCAGCAGAATAGTAACTGGCCTCA	EIVMTQSPATLSLSPGERATLSCRASQSVSSSLAWYQQKPGQAPRLLIYGASSRATGIPDRFSGSGSGTDFTLTISSLEPEDFAVYYCQQNSNWP
IGKV3-53*01_S4949_kim	CAAGTTATATTGACTCAGTCTCCAGCCACCCTGTCTTTGTCTCCAGGGGAAAGAGCCACCCTCTCCTGCAGGGCCAGTCAGAGTGTTGGCAGCAACTTAGCCTGGTACCAGCAGAAACCTGGGCAGGCCCCCAGGCTCCTCATCTATGGTGCATCCAGCAGGGCCACTGGCATCCCAGACAGGTTCAGTGGCAGTGGGTCTGGGACAGAGTTCACTCTCACCATCAGCAGCCTGGAGCCTGAAGATTTTGCAGTGTATTACTGTCAGAAGTATAGTAGCTCCCCTCC	QVILTQSPATLSLSPGERATLSCRASQSVGSNLAWYQQKPGQAPRLLIYGASSRATGIPDRFSGSGSGTEFTLTISSLEPEDFAVYYCQKYSSSP
IGKV3-NL_1*01_S0082_kim	CAAGTTATATTGACACAGTCTCCAGCCACCCTGTCTTTGTCTCCAGGGGAAAGAGCCACTCTCTCCTGCAGGGCCAGTCAGAGTGTCAGCAGCTACTTAGCCTGGTACCAGCAGAAACCTGGGCAGGCTCCCAGGCTCCTCATCTATGGTGCATCCAGCAGGGCCACTGGTATCCCAGACAGGTTCAGTGGCAGCGGGTCTGGGACAGACTTCACTCTCACCATCAGCAGCCTGGAGCCTGAAGATGTTGGAGTTTATCACTGCTATCAGCATAGCAGCGGGTACCC	QVILTQSPATLSLSPGERATLSCRASQSVSSYLAWYQQKPGQAPRLLIYGASSRATGIPDRFSGSGSGTDFTLTISSLEPEDVGVYHCYQHSSGY
IGKV3S9*01_S3133	GAAATTGTGATGACGCAGTCCCCAGCCACCCTGTCTTTGTCTCCAGGAGAAAGAGCCACCCTCTCCTGCAGGGCCAGTCAGAGTGTTAGCAGCTACGTAGCCTGGTACCAGCAGAAACCTGAGCAGGCTCCCAGGCTCCTCATCTATGGTGCATCCAGCAGGGCCACTGGCATCCCAGACAGGTTCAGTGGCAGTGGGTCTGGGACAGAGTTCACTCTCACCATCAGCAGCCTGGAGCCTGAAGATGTAGGAGTTTATTACTGTCAGCAGTATAATAACTGGAACC	EIVMTQSPATLSLSPGERATLSCRASQSVSSYVAWYQQKPEQAPRLLIYGASSRATGIPDRFSGSGSGTEFTLTISSLEPEDVGVYYCQQYNNWN
IGKV3S9*01_S7048	GAAATTGTGATGACGCAGTCCCCAGCCACCCTGTCTTTGTCTCCAGGAGAAAGAGCCACCCTCTCCTGCAGGGCCAGTCAGAGTGTTAGCAGCTACGTAGCCTGGTACCAGCAGAAACCTGAGCAGGCTCCCAGGCTCCTCATCTATGGTGCATCCAGCAGGGCCACTGGCATCCCAGACAGGTTCAGTGGCAGTGGGTCTGGGACAGACTTCACTCTCACCATCAGCAGCCTGGAGCCTGAAGATGTAGGAGTTTATTACTGTCAGCAGTATAATAACTGGAACC	EIVMTQSPATLSLSPGERATLSCRASQSVSSYVAWYQQKPEQAPRLLIYGASSRATGIPDRFSGSGSGTDFTLTISSLEPEDVGVYYCQQYNNWN
IGKV4-1*01_kim	GACATTGTGATGACCCAGTCTCCAGACTCCCTGGCTGTGTCTCTGGGAGAGAGGGTCACCATCAACTGCAAGTCCAGCCAGAGTCTTTTATACAGCTCCAACAATAAGAACTACTTAGCCTGGTACCAGCAGAAACCAGGACAGGCTCCTAAGCTGCTCATTTACTGGGCATCTACCCGGGAATCCGGGGTCCCTAACCGATTCAGTGGCAGTGGATCTGGGACAGATTTCACTCTCACCATCAGTGGCCTGCAGGCTGAAGATGTGGCAGTGTATTACTGTCAGCAGTATTATAGCACTCCTCT	DIVMTQSPDSLAVSLGERVTINCKSSQSLLYSSNNKNYLAWYQQKPGQAPKLLIYWASTRESGVPNRFSGSGSGTDFTLTISGLQAEDVAVYYCQQYYSTP
IGKV4S1*01_S7146	GACATTGTGATGACCCAGTCTCCAGACTCCCTGGCTGTGTCTCTGGGAGAGAGGGTCACCATCAACTGCAAGTCCAGCCAGAGTCTTTTATACAGCTCCAACAATAAGAACTACTTAGCCTGGTACCAGCAGAAACCAGGACAGGCTCCTAAGCTGCTCATTTACTGGGCATCTACCCGGGAATCCGGGGTCCCTAACCGATTCAGTGGCAGCGGGTCTGGGACAGATTTCACTCTCACCATCAGTGGCCTGCAGGCTGAAGATGTGGCAGTTTATTACTGTCAGCAGCATTACAGCTCTCCTCT	DIVMTQSPDSLAVSLGERVTINCKSSQSLLYSSNNKNYLAWYQQKPGQAPKLLIYWASTRESGVPNRFSGSGSGTDFTLTISGLQAEDVAVYYCQQHYSSP
IGKV5-11*01_S4599_kim	GAAACGATACTCACACAGTCTGCGGCATTCATGTCAGCGACTCCAGGAGACAAAGTCACCATCTCCTGCAAAGCCAGCCAAGACATTGATGATGACATGAACTGGTACCAACAGGAACCAGGAGAAGCTCCTAAACTCATTATTAAAGATGCTACTACTCTCGTTTCTGGAATCCCACCTCGATTCAGTGGCAGCGGGTATGGAACAGATTTTACTCTCACAATTAATAATGTAGAATCTGAGGATGCTGCATATTACTTCTGTCTACAACATGATAATTTCCCTCT	ETILTQSAAFMSATPGDKVTISCKASQDIDDDMNWYQQEPGEAPKLIIKDATTLVSGIPPRFSGSGYGTDFTLTINNVESEDAAYYFCLQHDNFP
IGKV5-11*02_kim_S7439	GAAACGATACTCACACAGTCTGCGGCATTCGTGTCAGCGACTCCAGGAGACAAAGTCACCATCTCCTGCAGAGCTGGCCAAGACATTGATGATGACATGAACTGGTACCAACAGGAACCAGGAGAAGCTCCTAAACTCATTATTAAAGATGCTACTACTCTCGTTTCTGGAATCCCACCTCGATTCAGTGGCAGCGGGTATGGAACAGATTTTACTCTCACAATTAATAATGTAGAATCTGAGGATGTATCTGTCTACAACATGATAATTTCCCTCT	ETILTQSAAFVSATPGDKVTISCRAGQDIDDDMNWYQQEPGEAPKLIIKDATTLVSGIPPRFSGSGYGTDFTLTINNVESEDVSVYNMIISL
IGKV5-5*01_kim	GAAATGATACTCACACAGTCTCCGGCATTTGTGTCAGCGACTCCAGGAGACAAAGTCACCATCTCCTGCAGAGCTGGCCAAGACATTGATGATGATATGAACTGGTATCAACAGGAACCAGGAGAAGCTCCTAAACTTATTATTAAAGATGCTACTACTCTCGTTTCTGGCATCCCACCTCAATTCAGTGGCAGTGGGTATGGGATAGATTTTACCCTGACAATTAATAGCATGAAATCTGAGGATACTGCATATTACTTCTGCCAACAGAGGGATAATACACCTCT	EMILTQSPAFVSATPGDKVTISCRAGQDIDDDMNWYQQEPGEAPKLIIKDATTLVSGIPPQFSGSGYGIDFTLTINSMKSEDTAYYFCQQRDNTP
IGKV6-55*01_S2457_kim	GAAATTGTGCTGACTCAGTCTCCAGCCTTTCGGTCTGTGACTCTAAAGGAGAAAGTCACCATCACCTGCCAGGCCAGTCAGAGCATTGGTAGTAGCTTACACTGGTACCAGCAGAAACCGGATCAGTCTCCAAAGCTCCTCATCAAGTATGCTTCCCAGTCCATCTCAGGGGTCCCCTCAAGGTTCAGTGGCAGTGGATCTGGGACAGATTTCACCCTCACCATCAATAGCCTGGAAGCTGAAGATGCTGCGACGTATTACTGTCAGCAGGGTAGTAGTTTCCCTCA	EIVLTQSPAFRSVTLKEKVTITCQASQSIGSSLHWYQQKPDQSPKLLIKYASQSISGVPSRFSGSGSGTDFTLTINSLEAEDAATYYCQQGSSFP
IGKJ1*01	GTGGACGTTCGGCCAAGGGACCAAGGTGGAAATCAAAC	WTFGQGTKVEIK
IGKJ2*01	TGTACAGTTTTGGCCAGGGGACCAAAGTGGAGATCAAAC	YSFGQGTKVEIK
IGKJ3*01	ATTCACTTTCGGCCCCGGGACCAAACTGGATATCAAAC	FTFGPGTKLDIK
IGKJ4*01	GCTCACTTTCGGCGGAGGGACCAAGGTGGAGATCAAAC	LTFGGGTKVEIK
IGKJ4*01_S4126	GCTCACTTTCGGCGGAGGGACCAAGGTGGAGCTCAAAC	LTFGGGTKVELK
IGKJ4*01_S8536	GCTCACTTTCGGCGGAGGGACCAAAGTGGAGATCAAAC	LTFGGGTKVEIK

## Sheet: I10_IGL
Allele	Sequence (NT)	Sequence (AA)
IGLV1-60*01_kim	CAGTCTGTGCTGACTCAGCCTCCCTCAGCGTCTGAGGCCGCCAGGAAGAGTGTCACCATCTCCTGTTCTGGAAGCAGCTCCAACATCGGAAGTAATAGTGTATCCTGGTACCAGCAGCTCCCAGGAACAGCTCCCAAACTCCTCATCTATTATAATGATCAACGAGCCTCAGGTGTCTCTGACCGATTCTCTGGCTCCAAGTCTGGCACGTCAGCCTCCCTGGCCATCAGTGGGCTCCAGACCGAGGATGAGGCTGATTATTACTGCGCAGCATGGGATGATAGCCTGAGCGGTCC	QSVLTQPPSASEAARKSVTISCSGSSSNIGSNSVSWYQQLPGTAPKLLIYYNDQRASGVSDRFSGSKSGTSASLAISGLQTEDEADYYCAAWDDSLSG
IGLV1-65*01_S7297_kim	CAGTCTGTGCTGACGCAGCCGCCCTCAGTGTCTGGGGACCCCGGGCAGAGGGTCACCATCTCGTGCACTGGGAGCAGCTCCAACATTGGAGGTTATTATGTATACTGGTACCAGCAGTTCCCAGGAACGGCCCCCAAACTCCTCATCTATGACAATAATAAGCGACCCTCAGGGGTTTCTGACCGATTCTCTGGCTCCAAGTCTGGTACCTCAGCCTCCCTGACCATCACTGGGCTCCAGCCTGGGGATGAGGCTGATTATTACTGCGGAGCATGGGATAGCAGCCTGAGTGCTCA	QSVLTQPPSVSGDPGQRVTISCTGSSSNIGGYYVYWYQQFPGTAPKLLIYDNNKRPSGVSDRFSGSKSGTSASLTITGLQPGDEADYYCGAWDSSLSA
IGLV1-67*02_S1070	CAGTCTGTGCTGACGCAGCCGCCCTCAGTGTCTGCGGCCCCAGGGCAGAAGGTCACCATCTCCTGCTCTGGAAGCAGCTCCAACATCGGGAGAAGTTATGTATCCTGGTACCAGCAGGTCCCAGGAACGGCCCCCAAACTCCTCATCTATCAAGATAATAAGCGACCCTCAGGGGTTTCTGACCGATTCTCTGGCTCCAAGTCTGGTACCTCAGCCTCCCTGACCATCACTGGGCTCCAGACTGGAGATGAGGCTGATTATTACTGCGGAGCATGGGATAACAGCCTGAGTGCTCA	QSVLTQPPSVSAAPGQKVTISCSGSSSNIGRSYVSWYQQVPGTAPKLLIYQDNKRPSGVSDRFSGSKSGTSASLTITGLQTGDEADYYCGAWDNSLSA
IGLV1-67*02_kim	CAGTCTGTGCTGACGCAGCCGCCCTCAGTGTCTGCGGCCCCAGGACAGAAGGTCACCATCTCCTGCTCTGGAAGCAGCTCCAACATCGGGAGAAGTTATGTATCCTGGTACCAGCAGGTCCCAGGAACGGCCCCCAAACTCCTCATCTATCAAGATAATAAGCGACCCTCAGGGGTTTCTGACCGATTCTCTGGCTCCAAGTCTGGTACCTCAGCCTCCCTGGCCATCACTGGACTCCAGACTGGAGATGAGGCTGATTATTACTGCTCAGCATGGGATAGCAGCCTGAGTGCTCA	QSVLTQPPSVSAAPGQKVTISCSGSSSNIGRSYVSWYQQVPGTAPKLLIYQDNKRPSGVSDRFSGSKSGTSASLAITGLQTGDEADYYCSAWDSSLSA
IGLV1-72*02_S1108_kim	CAGTCTGTGCTGACTCAACCACCCTCAGCGTCTGGGGCCCCCGGGCAGAGTGTCACCATCTCCTGTTCTGGAAGCAGCTCCAACATCGGAAGTAATTATGTATACTGGTACCAGCAGCTCTCAGGAAAGGCCCCCAAACTCCTCATCTATAATAATAATCAGCGACCCTCAGGGGTCCCTGATCGATTCTCTGGCTCCAAGTCTGGCACGTCAGCCTCCCTGGCCATCAGTGGGCTCCAGTCCGAGGATGAGGCTGATTATTACTGCTCAGCATGGGATAGCAGCCTGAGCGGTCC	QSVLTQPPSASGAPGQSVTISCSGSSSNIGSNYVYWYQQLSGKAPKLLIYNNNQRPSGVPDRFSGSKSGTSASLAISGLQSEDEADYYCSAWDSSLSG
IGLV1-72*02_S6532	CAGTCTGTGCTGACTCAACCACCCTCAGCGTCTGGGGCCCCTGGGCAGAGTGTCACCATCTCTTGTTCTGGAAGCAGCTCCAACATTGGAAGTAATTATGTACACTGGTACCAGCAGCTCTCAGGAAAGGCCCCCAAACTCCTCATCTATGATAATAATCAGCGACCCTCAGGGGTCCCTGATCGATTCTCTGGCTCCAAGTCTGGCACGTCAGCCTCCCTGGCCATCAGTGGGCTCCAATCCGAGGATGAGGCTGATTATTACTGCGCAGCATGGGATGACAGCCTGAGCGGTCC	QSVLTQPPSASGAPGQSVTISCSGSSSNIGSNYVHWYQQLSGKAPKLLIYDNNQRPSGVPDRFSGSKSGTSASLAISGLQSEDEADYYCAAWDDSLSG
IGLV1-77*02_S0477_kim	CAGTCTGTGCTGACTCAGCCACCCTCAGCGTCTGGGGCTCCCGGGCAGAGTGTCACCATCTCTTGCTCTGGAAGCAGCTCCAACATCAGAGGTAATGGTGTACACTGGTACCAGCAGCTCTCAGGAATGGCCCCCAAACTCCTCATCTATAATAATAATCAGCGACCCTCAGGGGTCCCTGACCGATTCTCTGGCTCCAAGTCTGGCACGTCAGCCTCCCTGGCCATCACTGGTCTCCGGTCTGAGGATGAGGCCGATTATTACTGCGAAGCATGGGATAACAGCCTGAGCGGTCC	QSVLTQPPSASGAPGQSVTISCSGSSSNIRGNGVHWYQQLSGMAPKLLIYNNNQRPSGVPDRFSGSKSGTSASLAITGLRSEDEADYYCEAWDNSLSG
IGLV1-81*01_S6654_kim	CAGTCTGTGCTGACTCAGCCACCCTCAGCGTCTGGGGCTCCCGGGCAGAGTGTCACCATCTCCTGTTCTGGAAGCAGCTCCAACATTGGAAGTAATGATGTGTACTGGTACCAGCAGTTCCCAGGAACGGCCCCCAAACTCCTCATCTATTATAGTAATCAGCGACCCTCAGGGGTCCCTGACCGATTCTCTGGCTCCAAGTCTGGCACGTCAGCCTCCCTGGCCATCACTGGTCTCCGGTCTGAAGATGAGGCTGATTATTACTGTGCAGCATGGGATAACAGCCTGAACGGTCC	QSVLTQPPSASGAPGQSVTISCSGSSSNIGSNDVYWYQQFPGTAPKLLIYYSNQRPSGVPDRFSGSKSGTSASLAITGLRSEDEADYYCAAWDNSLNG
IGLV1-NL_3*01_S4315_kim	CAGTCTGTGCTGACTCAACCACCCTCAGCGTCTGGGGCTCCCGGGCAGAGTGTCACCATCTCTTGCTCTGGAAGCAGCTCTAACATTGGAAGTAATGATGTGTACTGGTACCAGCAGCTCCCAGGAACGGCCCCCAAACTCCTCATCTATTATAGTAATCAGCGACCCTCAGGGGTCCCTGACCGATTCTCTGGCTCCAAGTCTGGCACGTCAGCCTCCCTGGCCATCAGTGGTCTCCGGTCCGAGGATGAGGCTGATTATTACTGCGAAGCATGGGATAGCAGCCTGAGCGGTCC	QSVLTQPPSASGAPGQSVTISCSGSSSNIGSNDVYWYQQLPGTAPKLLIYYSNQRPSGVPDRFSGSKSGTSASLAISGLRSEDEADYYCEAWDSSLSG
IGLV1-NL_6*01_S0378	CAGTCTGTGCTGACACAGCCGCCCTCAGTGTCTGGGGCCCCAGGGCAGAAGGTCACCATCTCGTGCACTGGGAGCAGCTCCAACATTGGAGGTTATGATGTACACTGGTACCAGCAGCTCCCAGGAACGGCCCCCAAACTCCTCATCTATGACAATAATAAGCGACCCTCAGGGATTTCTGACCGATTCTCTGGCTCCAAGTCTGGTACCTCAGCCTCCCTGGCCATCACTGGGCTCCAGACTGAGGATGAGGCTGATTATTACTGCCTGTCCTTTGACAGCAGCCTGAATGCTCA	QSVLTQPPSVSGAPGQKVTISCTGSSSNIGGYDVHWYQQLPGTAPKLLIYDNNKRPSGISDRFSGSKSGTSASLAITGLQTEDEADYYCLSFDSSLNA
IGLV1-NL_9*01_S1774	CAGTCTGTGCTGACGCAGCCGCCCTCAGCATCTGGGGCCCCCGGGCAGAGGGTCACCATCTCCTGCACTGGGAGCAGCTCCAACATCGGGGCGGGTTATTATGTATCCTGGTACCAGCAGTTCCCAGGAACGGTCCCCAAACTCCTCATCTATGAAAATAATAAGCGACCCTCAGGGGTTTCTGACCGATTCTCTGGCTCCAAGTCTGGTACCTCAGCCTCCCTGACCATCACTGGACTCCAGTCTGAGGATGAGGCTGATTATTACTGCTCAGCATGGGATAGCAGCCTGAGTGCTCA	QSVLTQPPSASGAPGQRVTISCTGSSSNIGAGYYVSWYQQFPGTVPKLLIYENNKRPSGVSDRFSGSKSGTSASLTITGLQSEDEADYYCSAWDSSLSA
IGLV10-114*01_kim	CAGGCAGGGCTGACTCAGCCACCCTCAGTGTCCAAGGGCTTGAGACAGACGGCCACGCTCACCTGCACTGGAAACAGCAACAATGTTGGCAACCAGGGAGCAGCTTGGCTGCAGCAGCACCAGGGCCACCCTCCCAAACTGCTGTCCTACAGGAATAACAACCGGCCCTCGGGGATCTCAGAGAGATTCTCTGCATCCAGGTCAGGAAACACAGCCTCCCTGACCATCACCGGACTCCAACCTGAGGATGAGGCTGACTATTACTGCTCAGCATGGGACAGCAGCCTCAGTGCTCA	QAGLTQPPSVSKGLRQTATLTCTGNSNNVGNQGAAWLQQHQGHPPKLLSYRNNNRPSGISERFSASRSGNTASLTITGLQPEDEADYYCSAWDSSLSA
IGLV11-117*01_S1272_kim	CAGCCTGTGCTGACTCAGCCACCCTCCCTGTCTGCATCCCCGGGAGCATCGGCCAGACTCCCCTGCACCCTGAGCAGTGACCTCAGTGTTGGTAGTAAAAACATGTACTGGTACCAGCAGAAGCCAGGGAGCGCTCCCAGGTTATTCCTGTACTACTACTCCGACTCAGACAAGCAGCTGGGACCTGGGGTCCCCAGTCGAGTCTCTGGCTCCAAGGAGACCTCAAGTAACACAGCGTTTTTGCTCATCTCTGGGCTCCAGCCTGAGGACGAGGCCGATTATTACTGTCAGGTGTATGACAGTAGTGCTAAT	QPVLTQPPSLSASPGASARLPCTLSSDLSVGSKNMYWYQQKPGSAPRLFLYYYSDSDKQLGPGVPSRVSGSKETSSNTAFLLISGLQPEDEADYYCQVYDSSAN
IGLV1S1*01_kim_S3540	CAGTCTGTGCTGACGCAGCCGCCCTCAGTGTCTGGGGCCCCCGGGCAGAGGGTCACCATCTCCTGCACTGGGAGCAGCTCCAACATCGGGGCGGGTTATTATGTGCAGTGGTACCAGCAGCTTCCAGGAACGGCCCCCAAACTCCTCATCTATGAAAATAATAAGCGACCCTCAGGGGTTTCTGATCGATTCTCTGGCTCCAAGTCTGGTACCTCAGCCTCCCTGACCATCACTGGACTCCAGTCTGAGGATGAGGCTGATTATTACTGCCAGTCCTATGACAGCAGCTTGAGTGCTCA	QSVLTQPPSVSGAPGQRVTISCTGSSSNIGAGYYVQWYQQLPGTAPKLLIYENNKRPSGVSDRFSGSKSGTSASLTITGLQSEDEADYYCQSYDSSLSA
IGLV1S2*01_S7035_kim	CAGTCTGTGCTGACGCAGCCGCCCTCAGTGTCTGGGGCGCCCGGGCAGAGGGTCACCATCTCCTGCACTGGGAGCAGCTCCAACATTGGGGCGGGTTATGGTGTGCAGTGGTACCAGCAGCTTCCAGGAACGGCCCCCAAACTCCTCATCTATGAAAATAATAAGCGACCCTCAGGGGTTTCTGATCGATTCTCTGGCTCCCAGTCTGGTACCTCAGCCTCCCTGACCATCACTGGACTCCAGTCTGAGGATGAGGCTGATTATTACTGCCAGTCCTATGACAGCAGCCTGAGTGCTCA	QSVLTQPPSVSGAPGQRVTISCTGSSSNIGAGYGVQWYQQLPGTAPKLLIYENNKRPSGVSDRFSGSQSGTSASLTITGLQSEDEADYYCQSYDSSLSA
IGLV2-11*01_kim	CAGTCTGCCCCGATTCAGTCTCCCTCTGTGTCTGGGTCTCTTGGACAGTCGGTCACCATCTCCTGCACTGGAACCAGCAGTGACATTGGGCGTTATAACTATGTCTCCTGGTACCGACAGCAGCCAGGCACGACCACCAAACTCATGATGTACAAAGTCAATATGCGGCCCTCAGGGGTCTCTGATCGCTTCTCTGGCTCCAAGTCTGGCAACACGGCCTCCCTGACCATCTCTGGACTCCAGGCTGAGGACGAGGCTGATTATTACTGTAGCTCATATGAGGCCAGCGACACTTTC	QSAPIQSPSVSGSLGQSVTISCTGTSSDIGRYNYVSWYRQQPGTTTKLMMYKVNMRPSGVSDRFSGSKSGNTASLTISGLQAEDEADYYCSSYEASDTF
IGLV2-13*03_kim	CAGGCTGCCCCGACTCAGTCTCCCTCTGTGTCTGGGTCTCCTGGACAGTCGGTCACCATTTCCTGCACTGGAACCAGCAGTGACATTGGTGGTTATAACCGTGTCTCCTGGTACCAACAGCACCCAGGCAAAGCCCCCAAACTCATGATTTATGAGGTCAGTAAGCGGCCCTCAGGGGTCTCTGATCGCTTCTCTGGTTCCAAGTCTGGCAACACGGCCTCCCTGACCATCTCTGGGCTCCAGGCTGAGGACGAGGCTGATTATTACTGCAGCTCATACGCAAGCAGTAGCACTTTC	QAAPTQSPSVSGSPGQSVTISCTGTSSDIGGYNRVSWYQQHPGKAPKLMIYEVSKRPSGVSDRFSGSKSGNTASLTISGLQAEDEADYYCSSYASSSTF
IGLV2-19*03_kim	CAGGCTGCCCCGACTCAGCCTCCCTCTGTGTCCGGGTCTCCTGGACAGTCGGTCACCATCTCCTGCACTGGAACCAGCAGTGATATTGGGTATTATAATGCTGTGTCTTGGTACCAACAGCATCCAGGCAAAGCCCCCAAACTCATGATTTATGAGGTCAGTAAGCGGCCCTCAGGGGTCTCTGATCGCTTCTCTGGCTCCAAGTCTGGCAACACGGCCTCCCTGACCATCTCTGGGCTCCAGGCTGAGGATGAGGCTGATTATTACTGCAGCTCATATGCAGGCAGCAACACTTTC	QAAPTQPPSVSGSPGQSVTISCTGTSSDIGYYNAVSWYQQHPGKAPKLMIYEVSKRPSGVSDRFSGSKSGNTASLTISGLQAEDEADYYCSSYAGSNTF
IGLV2-23*01_kim	CAGGCTGCCCTGACTCAGCCTCCCTCTGTGTCTGGGTCTCCTGGACAGTCGGTCACCATCTCCTGCACTGGAACCAGCAGTGACATCGGTGGTTATAACTATGTCTCCTGGTACCAGCAGCACCCAGGCAAAGCCCCCAAACTCATGATTTATGATGTCAGTAAGCGGCCCTCAGGGGTCTCTGATCGCTTCTCTGGCTCCAAATCTGGCAACACGGCCTCCCTGACCATCTCTGGGCTCCAGGCTGAGGATGAGGCTGATTATTACTGCAGCTCATATGCAGGCAGCAACACTTTC	QAALTQPPSVSGSPGQSVTISCTGTSSDIGGYNYVSWYQQHPGKAPKLMIYDVSKRPSGVSDRFSGSKSGNTASLTISGLQAEDEADYYCSSYAGSNTF
IGLV2-26*02_kim	CAGGCTGCCCTGACTCAGCCTCCCTCAGTGTCCAAGTCTCTTGGACAGTCGGTCACCATCTCCTGCGCTGGAACCAGCAGTGGCATTGCTAGTTATAGTGACGTCTCCTGGTACCAGCAGCACCCAGGCACAGCCCCCAGACTCCTGATTTACCGTGTCAGTAATCGACCCTCAGGGGTCTCTGATCGCTTCTCTGGCTTCAAGTCTGGCAGCACAGCCTCCCTGACCATCTCTGGGCTCCAGGCTGAGGACGAGGCTATTTATTACTGCTGCTCATATAGGAGTGGAAGCACTTTC	QAALTQPPSVSKSLGQSVTISCAGTSSGIASYSDVSWYQQHPGTAPRLLIYRVSNRPSGVSDRFSGFKSGSTASLTISGLQAEDEAIYYCCSYRSGSTF
IGLV2-32*01_S4286_kim	CAGGCTGCCCTGACTCAGCCTCGCTCAGTGTCTGGGTCTCCTGGACAGTCGGTCACCATCTCCTGCACTGGAACCAGCAGTGACATCGGTGGTTATAACTATGTCTCCTGGTACCAACAGCATCCAGGCACAGCCCCCAAACTCATGATTTATGAGGTCAGTAAGCGGCCCTCAGGGGTCTCTGATCGCTTCTCTGGCTCCAAGTCTGGCAACACGGCCTCCCTGACCATCTCTGGGCTCCAGGCTGAGGACGAGGCTGATTATTACTGCTGCTCATATGCAGGCAGCTACACTTTC	QAALTQPRSVSGSPGQSVTISCTGTSSDIGGYNYVSWYQQHPGTAPKLMIYEVSKRPSGVSDRFSGSKSGNTASLTISGLQAEDEADYYCCSYAGSYTF
IGLV2-46*01_S4740_kim	CAGGCTGCCCCGACTCAGCCTCCCTCTGTGTCTGGGTCTCCTGGACAGTCGGTCACCATCTCCTGCACTGGAACCAGCAGTGATATTGGGTATTATAATGCTGTGTCTTGGTACCAACAGCACCCAGGCACAGCCCCCAAACTCATGATTTATGGTGTCAGTAATCGGCCCTCAGGGGTCTCTGATCGCTTCTCTGGCTCCAAGTCTGGCAACACGGCCTCCCTGACCATCTCTGGGCTCCAGGCTGAGGACGAGGCTGATTATTACTGTTGTTCATATACAACCAGTAGCACTTTC	QAAPTQPPSVSGSPGQSVTISCTGTSSDIGYYNAVSWYQQHPGTAPKLMIYGVSNRPSGVSDRFSGSKSGNTASLTISGLQAEDEADYYCCSYTTSSTF
IGLV2S7*01_S8864_kim	CAGGCTGCCCCGACTCAGCCTCCCTCTGTGTCTGGGTCTCCTGGACAGTCGGTCACCATCTCCTGCACTGGAACCAGCAGTGACGTTGGTGGTTATAACTATGTCTCCTGGTACCAGCAGCACCCAGGCAAAGCCCCCAAACTCATGATTTATGGTGTCAGTAAGCGGCCCTCAGGGGTCTCTGATCGCTTCTCTGGCTCCAAGTCTGGCAACACGGCCTCCCTGACCATCTCTGGGCTCCAGGCTGAGGACGAGGCTGATTATTACTGTTGTTCATATACAACCAGTAGCACTTTC	QAAPTQPPSVSGSPGQSVTISCTGTSSDVGGYNYVSWYQQHPGKAPKLMIYGVSKRPSGVSDRFSGSKSGNTASLTISGLQAEDEADYYCCSYTTSSTF
IGLV2S8*01_S5539	CAGGCTGCCCTGACTCAGCCTCCCTCTGTGTCTGGGTCTCCTGGACAGTCGGTCACCATCTCCTGCACTGGAACCAGCAGTGACATCGGTGGTTATAACTATGTCTCCTGGTACCAGCAGCACCCAGGCAAAGCCCCCAAACTCATGATTTATGATGTCAGTAAGCGGCCCTCAGGGGTCTCTGATCGCTTCTCTGGCTCCAAGTCTGGCAACACGGCCTCCCTGACCATCTCTGGGCTCCAGGCTGAGGACGAGGCTGATTATTACTGTTGTTCATATACAACCAGTAGCACTTTC	QAALTQPPSVSGSPGQSVTISCTGTSSDIGGYNYVSWYQQHPGKAPKLMIYDVSKRPSGVSDRFSGSKSGNTASLTISGLQAEDEADYYCCSYTTSSTF
IGLV3-14*01_kim	TCCTATGAGCTGACTCAGCCACTCTCAGTGTCAGTGGCCCTGGGACAGATGGCCAGGATCACTTGTGGGGGAAACAATATTGGAAGAAAATATGTGTACTGGTACCAGCAGAAGCCAGACCAGGCCCCTGTGCTGGTCATCTATGAGGATAGCAAGCGGCCCTCGGGGATCCCTGAGCGATTCGCTGGCTCCAACTCGGGGAACACCGCCACCCTGACCATTGACGGAGCCCAAGCCAGGGATGAGGCTGACTATTACTGTCAGGTGTGGGACAGCAGCACTGCA	SYELTQPLSVSVALGQMARITCGGNNIGRKYVYWYQQKPDQAPVLVIYEDSKRPSGIPERFAGSNSGNTATLTIDGAQARDEADYYCQVWDSSTA
IGLV3-22*01_kim	TCCTATGAGCTGACACAGCCACCCTCAGTGTCAGTGTCCCCAGGACAGACGGCCAGGATCACCTGCTCTGGAGAAATACTGGCAAAAAAATATGCTCAGTGGTTCCAGCAGAAGCCAGGCCAGGCCCCTGTGCTGGTGATATATAAAGACAGTGAGAGGCCCTCAGGGATCCCTGAGCGATTCTCTAGCTCCAGTTCAGGGACAACAGTTACCTTGACCATCAGTGGGGCCCAGGCAGAAGATGAGGCTGACTATTACTGTCAATCAGCAGACAGCAGTGGTAATCATCC	SYELTQPPSVSVSPGQTARITCSGEILAKKYAQWFQQKPGQAPVLVIYKDSERPSGIPERFSSSSSGTTVTLTISGAQAEDEADYYCQSADSSGNH
IGLV3-25*02_S4956	TCCTATGAGCTGACTCAGCCACCCTCGGTGTCAGTGTCCCCAGGACAGACGGCCAGGATCACCTGTGGGGGAGACAACATTGGAAGTGAAGTTGTGAACTGGTACCAGCAGAAGCCACCGCAGGCCCCTGTGCTGGTCATCTATGCTGATAGCGAACGGCCCTCAGGGATCCCTGAGCGATTCTCTGGCTCCAACTCAGGGAACACCGCCACCCTGACCATCAGCAGGGTCGAGGCCGGGGATGAGGCTGACTATTACTGTCAGGTGTGGGACAGTAGTAGTAAATACGC	SYELTQPPSVSVSPGQTARITCGGDNIGSEVVNWYQQKPPQAPVLVIYADSERPSGIPERFSGSNSGNTATLTISRVEAGDEADYYCQVWDSSSKY
IGLV3-25*02_S9309	TCCTATGAGCTGACTCAGCCACCCTCGGTGTCAGCGGCCTCAGGACAGACGGCCAGGATCACCTGTGGGGGAGACAACATTGGAAGTAAAAATGTGCACTGGTACCAGCAGAAGCCAGCGCAGGCCCCTGTGCTGGTCATCTATGCTGATAGCAAACGGCCCTCAGGGATCCCTGAGCGATTCTCTGGCTCCAACTCAGGGAACACGGCCACCCTGACCATCAGCGGGGTCGAGGCCGGGGATGAGGCTGACTATTACTGTCAGGTGTGGGACAGTAGTAGTAAATACGC	SYELTQPPSVSAASGQTARITCGGDNIGSKNVHWYQQKPAQAPVLVIYADSKRPSGIPERFSGSNSGNTATLTISGVEAGDEADYYCQVWDSSSKY
IGLV3-27*01_S5912_kim	TCTTCTGAGCTGACTCAGGACCCTGCAGTGTCTGTGGCCTTGGGACAGACAGTCAGGATCACCTGCCAAGGAGACAGCCTCAAAACCTATTATGCAAGCTGGTACCAGCAGAAGCCAGGCCAGGCCCCTGTGCTGGTCGTCTATGGTAACAACTACCGGCCCTCAGGGATCCCAGAGCGATTCTCTGGCTCCAGCTCAGGAAACACAGCTTCCTTGACCATCACTGGGGCTCAGGTGGAAGATGAGGCTGACTATTACTGTGACTCCTGGGACAGCAGCGGTACCCATCC	SSELTQDPAVSVALGQTVRITCQGDSLKTYYASWYQQKPGQAPVLVVYGNNYRPSGIPERFSGSSSGNTASLTITGAQVEDEADYYCDSWDSSGTH
IGLV3-29*01_S7264_kim	TCCTATGATGTGACTCAGCCACGCTCAGTGTCTGTGTCCCCAGGACAGACGGCCAGCATCACCTGTGGGGCAGACAACATTGGAAGTAAAAATGTGCACTGGTACCAGCAGAAGCCAGCGCAGGCCCCTGTGCTGGTCATCTATTATGATAGCGACCGGCCCTCAGGGATCCCTGAGCGATTCTCTGGCTCCAACTCAGGGAACACCGCCACCCTGACCATCAGCGGGGTCGAGGCCGGGGATGAGGCTGACTATTACTGTCAGGTGTGGGACAGTAGTAGTGATCATCC	SYDVTQPRSVSVSPGQTASITCGADNIGSKNVHWYQQKPAQAPVLVIYYDSDRPSGIPERFSGSNSGNTATLTISGVEAGDEADYYCQVWDSSSDH
IGLV3-34*02_S7436	TCCTATGAGCTGACTCAGTCACCCTCAGTGTCGGTGTCCCCAGGACAGACAGCCAGCATCACCTGCTCTGGAGATAAATTTGGGAATGCATATGCTTACTGGTACCAGCAGAAGCCAGGCCAGGTCCCTGTACTGGTCATCTATAAAAATAGCAACCGGCCCTCAGGGATCCCTGAGCGATTCTCTGGCTCCAACTCGGGGAACACGGCCACCCTGACCATCAGCGGGGTCGAGGCCGGGGATGAGGCTGACTATTACTGTCAGGTGTGGGACAGTAGTAGTAAATATGC	SYELTQSPSVSVSPGQTASITCSGDKFGNAYAYWYQQKPGQVPVLVIYKNSNRPSGIPERFSGSNSGNTATLTISGVEAGDEADYYCQVWDSSSKY
IGLV3-39*02_S5280_kim	TCCTCCGAGCTGACTCAGGAGCCTGCATTGTCTGTGGCCTTGGGACATACAGTCAGGATGACCTGCCAAGGAGACAGCCTCAAAACCTATTATGCAAGCTGGTACCAGCAGAAGCCAGGCCAGGTCCCTGTGCTGGTCGTCTATGGTAACAATTACCGGCCCTCAGGGATCCCAGGCCGATTCTCTGTCTCCTGGTCAGGAAACACAGGTTCCTTGACCATCACTGCGGCTCAGGTGGAAGATGAGGCTGACTATTACTGTAACTCCTGGGACAGCAGCGGTACCCATCC	SSELTQEPALSVALGHTVRMTCQGDSLKTYYASWYQQKPGQVPVLVVYGNNYRPSGIPGRFSVSWSGNTGSLTITAAQVEDEADYYCNSWDSSGTH
IGLV3-40*01_S5270_kim	TCCTATGAGCTGACTCAGCCACGCTCAGTGTCTGTGTCCCCAGGACAGACGGCCAGGATCACCTGTGGGGGAGACAACATTGGAAGTAAAAGTGTGCACTGGTACCAGCAGAAGCCACCGCAGGCCCCTGTGCTGGTCATCTATGCTGATAGTGAACGGCCCTCAGGGATCCCTGATCGATTCTCTGGCTCCAACTCAGGGAACACGGCCACCCTGACCATCAGCGGGGTCGAGGCCGGGGATGAGGCTGACTATTACTGTCAGGTGTGGGACAGTAGTAGTGATCATCC	SYELTQPRSVSVSPGQTARITCGGDNIGSKSVHWYQQKPPQAPVLVIYADSERPSGIPDRFSGSNSGNTATLTISGVEAGDEADYYCQVWDSSSDH
IGLV3-43*01_S9041	TCCTCCGGGCTGACTCAGGAGCCTGCATTGTCTGTGGCCTTGGGACATACAGTCAGGATGACCTGCCAAGGAGACAGCCTCAAAACGTATTATGCAAGCTGGTACCAGCAGAAGCCAGGCCAGGTCCCTGTGCTGGTCATCTATGGTAACAACTACCGGCCCTCAGGGATCCCAGGCCGATTCTCTGTCTCCTGGTCAGGAAACACAGGTTCCTTGATCATCACTGCGGCTCAGGTGGAAGATGAGGCTGACTATTACTGTAACTCCTGGGACAGCAGCGGTACCCATCC	SSGLTQEPALSVALGHTVRMTCQGDSLKTYYASWYQQKPGQVPVLVIYGNNYRPSGIPGRFSVSWSGNTGSLIITAAQVEDEADYYCNSWDSSGTH
IGLV3-44*01_S1550	TCCTATGAGGTGACTCAGGCACCCTCGGTGTCAGTGTCCCCAGGACAGACGGCCAGGATCATCTGTGGGGGAGACAACATTGGAAATGTAGCTGTGCATTGGTACCAGCAGAAGCCACCGCAGGCCCCTGTACTGGTCATCTATGCTGATGACGAACGGCCCTCAGGGATCCCTGAGCGATTCTCTGGCTCCAACTCAGGGAACACCGCCACCCTGACCATCTCCAGGGTCGAGGCCGGGGATGAGGCTGACTATTATTGTCAGGTGTGGGATAGTATTAGAGA	SYEVTQAPSVSVSPGQTARIICGGDNIGNVAVHWYQQKPPQAPVLVIYADDERPSGIPERFSGSNSGNTATLTISRVEAGDEADYYCQVWDSIR
IGLV3-48*01_kim	TCCTATGAGCTGACACAGCCACCCTCGGTTTCGGTGTCCCCGGGACAGACGGCCAGGATCACCTGCTCTGGAGATGCATTGCCAAAAAATTATGCTTATTGGTACCAGCAGAAGCCAGGCCAGGTGCCTGTGCTGGTGATTTATAAAGACAGTGAGCGGCCCTCAGGGATTCCTGAACGTTTCTCTGGCTCCAGCTCAGGGACCACAGTCACCCTGACCGTCAGCGGGGCCCAGGCTGAGGATGAGGCTGACTATTACTGTTACTCTGGGGATGGCAACAGTCT	SYELTQPPSVSVSPGQTARITCSGDALPKNYAYWYQQKPGQVPVLVIYKDSERPSGIPERFSGSSSGTTVTLTVSGAQAEDEADYYCYSGDGNS
IGLV3-NL_2*01_S4735	TCCTATGAGCTGACTCAGCCACGCTCGGTGTCGGTGTCCCAGGGACAGACGGCCAGGATCACCTGTGGGGGAGACAACATTGGAAGTGAAGCTGTGCAGTGGTACCAGCAGAAGCCAGCGCAGGCCCCTGTGCTGGTCATCTATGATGATAGCGAACGGCCCTCAGGGATCCCTGATCGATTCTCTGGCTCCAAATCAGGGAACACCGCCACCCTGACCATCAGCGGGGTCGAGGCTGGGGATGAGGCTGACTATTACTGTCAGGTGTGGGATAGTAGTAGTGATCATCC	SYELTQPRSVSVSQGQTARITCGGDNIGSEAVQWYQQKPAQAPVLVIYDDSERPSGIPDRFSGSKSGNTATLTISGVEAGDEADYYCQVWDSSSDH
IGLV3-NL_4*01_S5327	TCCTATGAGCTGACTCAGCCACCCTCGGTGTCAGTGTCCCCAGGACAGACGGCCAGGATCACCTGTGGGGGAGACAACATTGGAAGTGAAGTTGTGAACTGGTACCAGCAGAAGCCACCGCAGGCCCCTGTGCTGGTCATCTATTATGATAGCGAACAGCCCTCAGGGATCCCTGAGCGATTCTCTGGCTCCAAATCAGGGAACACGGCCACCCTGACCATCAGCGGGGTCGAGGCCGGGGATGAGGCTGACTATTACTGTCAGGTGTGGGACATTAGTAGTGATCATCC	SYELTQPPSVSVSPGQTARITCGGDNIGSEVVNWYQQKPPQAPVLVIYYDSEQPSGIPERFSGSKSGNTATLTISGVEAGDEADYYCQVWDISSDH
IGLV3S16*01_S4690_kim	TCCTATGAGCTGACACAGCCACCCTCGGTGTCAGTGTCCCCTGGACAGACGGCCAAGATTACCTGCTCTGGAGATGTACTGGCAAAATATTATGCTCATTGGTACCAGCAGAAGCCAGGCCAGGCGCCTGTGCTGGTGATTTATAAAGACAGTGAGAGGCCCTCAGGGATCCCTGAGCGATTCTCTGGCTCCAGCTCAGGGACCACAGTCACCCTGACCATCAGCGGGGCCCAGGCTGAGGATGAGGCTGACTATTACTGTTACTCTGGGGATGACAACAATCT	SYELTQPPSVSVSPGQTAKITCSGDVLAKYYAHWYQQKPGQAPVLVIYKDSERPSGIPERFSGSSSGTTVTLTISGAQAEDEADYYCYSGDDNN
IGLV4-97*01_S4956_kim	CAGCCTGTGCTGACTCAGTCGCCCTCTGCCTCTGCCTCCCTGGGAGCCTCGGTCAAGCTCACCTGCACTCTGAGCAGTGGGCACAGCAGCTACGCCATCGCATGGCATCAGCAGCAGCAAGGGAAGGCCCCACGGTACTTAATGAGGCTTAACAGTGATGGCAGCCACAGCAAGGGGGACGGGATCCCTGATCGCTTCTCAGGCTCCAGCTCCGGGGCTGAGCGCTACCTCACCATCTCCAACCTCCAGTCTGAGGATGAGGCTGATTATTACTGTCAGACCTGGACTACTGGCATTCA	QPVLTQSPSASASLGASVKLTCTLSSGHSSYAIAWHQQQQGKAPRYLMRLNSDGSHSKGDGIPDRFSGSSSGAERYLTISNLQSEDEADYYCQTWTTGI
IGLV4-NL_1*03_S5303_kim	CAGCCTGTGCTGACTCAGTCGCCTTCTGCCTCTGCCTCCCTGGGAGCCTCGGTCAAGCTCACCTGCACTCTGAGCAGTGGGCACAGTAGCTACAACATCGCATGGCATCAGCAGCAGCAAGGGAAGGCCCCTCGGTACTTGATGTGGCTTAAAAGTGATGGCAGCCACAGCAAGGGGGATGGGATCCCTGATCGTTTCTCAGGCTCCAGCTCTGGGGCTGAGCGCTACCTCACCATCTCCAACCTCCAGTCTGAGGATGAGGCTGATTATTACTGTCAGACCTGGACTACTGACATTCA	QPVLTQSPSASASLGASVKLTCTLSSGHSSYNIAWHQQQQGKAPRYLMWLKSDGSHSKGDGIPDRFSGSSSGAERYLTISNLQSEDEADYYCQTWTTDI
IGLV5-57*02_kim	CAGCCTGTGCTGACCCAGCCTCCTTCCTTTTCTACATCTGGAGCATCAGCCAGTCTCACCTGCACTTTGCGCAGCGACATCAATGTTAGTAGATACCGAATATATTGGTACCAGCAGAAGCCAGAGAGCCCTCCCAGGTATCTCCTGAGCTACTACTCAGACTCATATAAGCACCAGGGCTCTGGAGTCCCCAGCCGCTTCTCTGGATCCAAAGATGCCTCGGTCAATGCAGGGCTTTTACTCATCTCTGGACTCCAGCCTGAGGATGAGGCTGACTATTATTGTAAGACTGGGTATGGCAATGCTTCT	QPVLTQPPSFSTSGASASLTCTLRSDINVSRYRIYWYQQKPESPPRYLLSYYSDSYKHQGSGVPSRFSGSKDASVNAGLLLISGLQPEDEADYYCKTGYGNAS
IGLV5-62*01_kim	AAGCCTATGCTGACTCAGCCGGCCTCCCTCTCAGCATCTCCTGGAGCATCAGCCAGTCTCACATGCACCTTCAGCGGTGGCATCAATGTTGCTGGCTACCACATATTCTGGTACCAGCAGAAGCCAGGGAGTCCTCCCCGGTATCTTCTGAGGTACAAATCAGACTCAGATAAGGGCCAGGGCTCTGGAGTCCCCAGCCGCTTCTCTGGATCCAAAGATGCTTCAGCGAACACAGGGATTTTACGCATCTCTGGGCTCCAGTCTGAGGATGAGGCTGACTATTACTGTGCCATTGGGCACAGCAGCGGTCCT	KPMLTQPASLSASPGASASLTCTFSGGINVAGYHIFWYQQKPGSPPRYLLRYKSDSDKGQGSGVPSRFSGSKDASANTGILRISGLQSEDEADYYCAIGHSSGP
IGLV5-69*01_kim	CAGCCTGTGCTGACCCAGCCAACCTCCCTCTCAGCATCTCCGGGAGCATCAGCCAGACTCAGCTGCACCTTGAGCAGTGGCATCAATGTTGGTAGTTACAGCATATTCTGGTACCAGCAGAAGCCAGGGAGTCCTCCCCGGTACCTTCTGTACTACTACTCAGACTCAAGTAAGCACCAGGGCTCTGGAGTCCCCAGCCGCTTCTCTGGATCCAAAGATGCTTCAGCCAATGCAGGGCTTTTACTGATCTCTGGGCTCCAGTCTGAAGATGAGGCTGACTATTACTGTGCCATATGGCACAGCAGCGCTTCT	QPVLTQPTSLSASPGASARLSCTLSSGINVGSYSIFWYQQKPGSPPRYLLYYYSDSSKHQGSGVPSRFSGSKDASANAGLLLISGLQSEDEADYYCAIWHSSAS
IGLV5-74*02_kim	CAGCCTGTGCTGACTCAGCCAACCTCCCTCTCAGCATCTCCTGGAGCATCAGTCAGACTCACCTGCACCTTGCGCAGTGGCATCAGTGTTGGTGGCTACAATATACACTGGTACCAGCAGAAGCCAGGGAGTCCTCCCCGGTACCTACTGTACTACTACTCAGACTCAAATAAGGGCCAGGGCTCTGGAGTCCCCAGCCGCTTCTCTGGATCCAAAGATGCTTCGGCCAATGCAGGGATTTTACTCATCTCTGGGTTCCAGTCTGAGGATGAGGCTGACTATTACTGTACGACTTGGCACAACAATGCTTCT	QPVLTQPTSLSASPGASVRLTCTLRSGISVGGYNIHWYQQKPGSPPRYLLYYYSDSNKGQGSGVPSRFSGSKDASANAGILLISGFQSEDEADYYCTTWHNNAS
IGLV5-83*02_S4213_kim	CAGCCTGTGCTGACTCAGCCAACCTCCCTCTCAGCATCTCCTGGAGCATCAGCCAGACTCACCTGCACCTTGAGCAGTGGCATCAGTGTTGGTAGTTACAGGATATTCTGGTACCAGCAGAAGCCAGGGAGTCCTCCCCGGTATCTTCTGAACTACCACACAGACTCAGATAAGCACCAGGGCTCTGGAGTCCCCAGCCGCTTCTCTGGATCCAAAGATGCTTCGGCCAATGCAGGGATTTTACTCATCTCTGGGCTCCAGTCTGAGGATGAGGCTGACTATTACTGTATGATTTGGCACAACAATGCTTCT	QPVLTQPTSLSASPGASARLTCTLSSGISVGSYRIFWYQQKPGSPPRYLLNYHTDSDKHQGSGVPSRFSGSKDASANAGILLISGLQSEDEADYYCMIWHNNAS
IGLV5-87*01_S3390	CAGCCTGTGCTGACTCAGCCAGCCTCCGTCTCAGCATCTCCTGGAGCATCAGCCAGTCTCACATGCACCTTCAGTGGTGGCACCAATGTTGGTGACTACACTATACACTGGTACCAGCAGAAGCCAGGGAGTCCTCCCCGGTATCTTCTGAAGTACAAATCAGACTCAGATAAGCACCAGGGCTCTGGAGTCCCCAGTCGCTTCTCTGGATCCAAAGATGCTTCAGCGAACACAGGGATTTTACGCATCTCTGGGCTCCAGTCTGAGGATGAGGCTGACTATTACTGTGCCATTGGGCGCAGCAGCGCTT	QPVLTQPASVSASPGASASLTCTFSGGTNVGDYTIHWYQQKPGSPPRYLLKYKSDSDKHQGSGVPSRFSGSKDASANTGILRISGLQSEDEADYYCAIGRSSA
IGLV5-87*01_S8201_kim	CAGCCTGTGCTGACTCAGCCGGCCTCCCTCTCAGCATCTCCTGGAGCATCAGCCAGTCTCACATGCACCTTCAGTGGTGGCACCAATGTTGGTGACTACACTATACACTGGTACCAGCAGAAGCCAGGGAGTCCTCCCCGGTATCTTCTGAAGTACAAATCAGACTCAGATAAGCACCAGGGCTCTGGAGTCCCCAGTCGCTTCTCTGGATCCAAAGATGCTTCAGCGAACACAGGGATTTTACGCATCTCTGGGCTCCAGTCTGAGGATGAGGCTGACTATTACTGTGCCATTGGGCGCAGCAGCGCTTCT	QPVLTQPASLSASPGASASLTCTFSGGTNVGDYTIHWYQQKPGSPPRYLLKYKSDSDKHQGSGVPSRFSGSKDASANTGILRISGLQSEDEADYYCAIGRSSAS
IGLV5-95*01_S2857_kim	CAGCCTGTGCTGACTCAGCCATCTTCCCATTCCGCATCTCTTGGAGCGCCAGCCAGACTCACCTGCACGCTGAGCAGTGGCTTCAGTGTTGGTGACTTCTGGATACGGTGGTACCAACAAAAGCCAGGGAGCCCTCCCCGGTATCTCCTGTACTACCACTCAGACTCAGATAAGCACCAAGGCTCTGGAGTTCCCAGCCGCTTCTCTGGATCCAATGATGCATCAGCCAATGCAGGGATTCTGCATATCTCTGGGCTCCAGCCTGAGGATGAGGCTGACTATTACTGTTGTACATGGCATGGCAACTCTAAGACTCA	QPVLTQPSSHSASLGAPARLTCTLSSGFSVGDFWIRWYQQKPGSPPRYLLYYHSDSDKHQGSGVPSRFSGSNDASANAGILHISGLQPEDEADYYCCTWHGNSKT
IGLV5-99*01_kim_S4306	CAGTCTGTGCTGACTCAGCCACCCTCCCTCTCTGCATCCCTGGAAGCATTAGCCAGACTCACCTGCACCCTGAGCAGTGGCATCAGTGTTGGTGGAAAAATTGTATACTGGTACCAGCAGAAGCCAGGGAGCAATCCCCGGTATCTCCTGAGCTACTACTCAGAGTCAAGTAAGCACCAGGGCTCTGGAGTCCCCAGCCGCTTCTCTGGATCCAAAGATGCCTCAACTAACTCAGGGATTCTGCACGTCTCTGGGCTGCAGCCTGAGGATGAGGCTGACTATTATTGTAAGATATGGCATGACAGCATTAATGCTTA	QSVLTQPPSLSASLEALARLTCTLSSGISVGGKIVYWYQQKPGSNPRYLLSYYSESSKHQGSGVPSRFSGSKDASTNSGILHVSGLQPEDEADYYCKIWHDSINA
IGLV6-110*01_kim	GAGGTTGTGTTCACTCAGCCCCATTCTGTGTCGGGGTCTCCGGGGCAGACGGTCACCATCTCCTGCACCCGCAGCAGTGGCAGCATTGACAGTGAATATGTGCAGTGGTACCAGCAGCGCCCGGGCAATGCCCCCACCACAGTGATTTACAAAGATAACCAAAGACCCTCTGGGGTCCCTGATCGGTTCTCTGGCTCCATCGACAGCTCCTCCAACTCTGCCTCCCTCGCCATCTCTGGGCTGAAGTCTGAGGACGAGGCTGACTACTACTGTCAGTCTGCTGATGACAGCTACAATCC	EVVFTQPHSVSGSPGQTVTISCTRSSGSIDSEYVQWYQQRPGNAPTTVIYKDNQRPSGVPDRFSGSIDSSSNSASLAISGLKSEDEADYYCQSADDSYN
IGLV6-112*01_S8974_kim	GAGGTTGTGTTCACTCAGCCCCATTCTGTGTCGGGGTCTCCGGGGCAGACGGTCACCATCTCCTGTACCCGCAGCAGTGGCAGCATTGACAGTAAATATGTGCAGTGGTACCAGCAGCGCCCGGGCAGTGCCCCCACCACAGTGATTTACAAAGATAACCAAAGACCCTCTGGGGTCCCTGATCGGTTCTCTGGCTCCATCGACAGCTCCTCCAACTCTGCCTCCCTCACCATCTCTGGGCTGAAGTCTGAGGACGAGGCTGACTACTACTGTCAGTCTGCTGATGGCAGCTACAATCC	EVVFTQPHSVSGSPGQTVTISCTRSSGSIDSKYVQWYQQRPGSAPTTVIYKDNQRPSGVPDRFSGSIDSSSNSASLTISGLKSEDEADYYCQSADGSYN
IGLV6-92*01_S4723	GGTTGTGTTCACTCAGCCCCATTCTGTGTCGGGGTCTCCGGGGCAGATGGTCACCATCTCCTGCACCCGCAGCAGTGGCAGCATTGACAACAGCTATGTGTACTGGTACCAGCAGCGCCCGGGCAGTGCCCCCACCACTGTGATCTACAATGATGACCAAAGACCCTCTGGGGTCCCTGATCGGTTCTCTGGCTCCATCGACAGCTCCTCCAACTCTGCCTCCCTCACCATCTCTGGACTGAAGTCTGAGGATGAGGCTGACTATTACTGTCAGTCTTATGACAGCAGCGGTTATCA	GCVHSAPFCVGVSGADGHHLLHPQQWQH*QQLCVLVPAAPGQCPHHCDLQ**PKTLWGP*SVLWLHRQLLQLCLPHHLWTEV*G*G*LLLSVL*QQRLS
IGLV6-NL_1*01_S2594_kim	GAGGTTGTGTTCACTCAGCCCCATTCTGTGTCGGGGTCTCCGGGGCAGACGGTCACCATCTCCTGCACCCGCAGCAGTGGCAGCATTGACAACAGCTATGTGTACTGGTACCAGCAGCGGCCGGGCAGCGCCCCCACCACTGTGATTTACAAAGATAACCAAAGACCCTCTGGGGTCCCTGATCGGTTCTCTGGCTCCATCGACAGCTCCTCCAACTCTGCCTCCCTCACCATCTCTGGACTGAAGTCTGAGGACGAGGCTGACTATTACTGTCAGTCTTATGACAGCAGCAGTTATCA	EVVFTQPHSVSGSPGQTVTISCTRSSGSIDNSYVYWYQQRPGSAPTTVIYKDNQRPSGVPDRFSGSIDSSSNSASLTISGLKSEDEADYYCQSYDSSSY
IGLV7-76*01_S8382	CAGGCTGTAGTGACTCAGGAGCCCTCAATGACTGTGTCCCCAGGAGGGACAGTCACTCTCACCTGTGCTTCCAGCACTGGAGCAGTCACCAGTGGTCACTCTCCACACTGGTTCCAGCAGAAACCTGGACAAGCCCCCAAGACACTGATTTATAATACAAACTACAAACACTCCTGGACTCCTGCCCGGTTCTCAGGCTCCCTCCTTGGGGGTAAAGCTGCCCTGACACTGTCAGGTGCGCAGCCTGAGGATGAGGCTGAGTATTACTGCTTGCTGCACTATAGTGGTGCTCAG	QAVVTQEPSMTVSPGGTVTLTCASSTGAVTSGHSPHWFQQKPGQAPKTLIYNTNYKHSWTPARFSGSLLGGKAALTLSGAQPEDEAEYYCLLHYSGAQ
IGLV7-88*01_S2336_kim	CAGGCTGTAGTGACTCAGGAGCCCTCACTGACTGTGTCCCCAGGAGGGACAGTCACTCTCACTTGTGGCTCCAGTGCTGGAGCAGTCACTGGGAGTCATTATCCCTACTGGTTCCAGCAGAAGCCTGGCCAAGCCCCTAGAACACTGATTTATGATACAAGCAACAAGCTCTCCTGGACCCCTGCCCGGTTCTCAGGCTCCCTCCTTGGGGGTAAAGCTGCCCTGACACTGTCAGGTGCGCAGCCCGAGGACGAGGCTGAGTATTACTGCTGGCTGCACTATAGTGGTGCTCAG	QAVVTQEPSLTVSPGGTVTLTCGSSAGAVTGSHYPYWFQQKPGQAPRTLIYDTSNKLSWTPARFSGSLLGGKAALTLSGAQPEDEAEYYCWLHYSGAQ
IGLV7-88*01_kim	CAGGCTGTAGTGACTCAGGAGCCCTCACTGACTGTGTCCCCAGGAGGGACAGTCACTCTCACTTGTGGCTCCAGTGCTGGAGCAGTCACTGGGAGTCATTATCCCTACTGGTTCCAGCAGAAGCCTGGCCAAGCCCCTAGAACACTGATTTATGATACAAGCAACAAGCTCTCCTGGACCCCTGCCCGGTTCTCAGGCTCCCTCCTTGGGGGTAAAGCTGCCCTGACACTGTCAGGTGCGCAGCCTGAGGATGAAGCTGAGTATTACTGCTGGCTGCACTATAGTGGTGCTCAG	QAVVTQEPSLTVSPGGTVTLTCGSSAGAVTGSHYPYWFQQKPGQAPRTLIYDTSNKLSWTPARFSGSLLGGKAALTLSGAQPEDEAEYYCWLHYSGAQ
IGLV7-NL_1*01_S2652_kim	CAGGCTGTAGTGACTCAGGAGCCCTCACTGACTGTGTCCCCAGGAGGGACAGTCACTCTCACCTGTGGCTCCAGCGCTGGAGCAGTCACCAGTGGTAACTATCCAAACTGGTTCCAGCAGAAACCTGGACAAGCCCCCAGGGGACTGATTTACAATACAAACAGCAAACACTCCTGGACCCCTGCCCGGTTCTCAGGCTCCCTCGCTGGGGGCAAAGCTGCCCTGACACTGTCAGGTGCACAGCCCGAGGACGAGGCTGAGTATTACTGCTTGCTGTACTATAGTGGTGCTCAG	QAVVTQEPSLTVSPGGTVTLTCGSSAGAVTSGNYPNWFQQKPGQAPRGLIYNTNSKHSWTPARFSGSLAGGKAALTLSGAQPEDEAEYYCLLYYSGAQ
IGLV7-NL_1*01_S3773_kim	CAGGCTGTAGTGACTCAGGAGCCCTCACTGACTGTGTCCCCAGGAGGGACAGTCACTCTCACCTGTGGCTCCAGCACTGGAGCAGTCACCAGTGGTAACTATCCACACTGGTTCCAGCAGAAACCTGGACAAGCCCCCAGGGGACTGATTTACAATACAAACAGCAAACACTCCTGGACCCCTGCCCGGTTCTCAGGCTCCCTCGCTGGGGGCAAAGCTGCCCTGACACTGTCAGGTGCACAGCCCGAGGACGAGGCTGAGTATTACTGCTTGCTGTACTATAGTGGTGCTCAG	QAVVTQEPSLTVSPGGTVTLTCGSSTGAVTSGNYPHWFQQKPGQAPRGLIYNTNSKHSWTPARFSGSLAGGKAALTLSGAQPEDEAEYYCLLYYSGAQ
IGLV8-125*02_S1361_kim	GAGACTGTGGTGACCCAGGAGCCATCGTTGTCAGTGTCCCCTGGAGGAACAGTCACACTCACCTGTGGCCTGAGCTCTGGCTCAGTCTCTACCAGTAACTACCCCAGCTGGTACCAGCAGACCCCAGGCCAGGCTCCACGCACGCTCATCTACAGCACAAACACTCGCCCTTCTGGGGTCCCTGATCGCTTCTCTGGCTCCATCCTTGGGAACAAAGCTGCCCTCACCATCACGGGGGCTCAGGCAGACGATGAATCTGATTATTACTGTACGCTCTACATGGGTAGTGGCATTTC	ETVVTQEPSLSVSPGGTVTLTCGLSSGSVSTSNYPSWYQQTPGQAPRTLIYSTNTRPSGVPDRFSGSILGNKAALTITGAQADDESDYYCTLYMGSGI
IGLV8-125*02_S4874_kim	GAGACTGTGGTGACCCAGGAGCCATCGTTGTCAGTGTCCCCTGGAGGAACAGTCACACTCACCTGTGGCCTGAGCTCTGGCTCAGTCTCTACCAGTAACTACCCCAGCTGGTACCAGCAGACCCCAGGCCAGGCTCCACGCACGCTCATCTACAGCACAAACACTCGCCCTTCTGGGGTCCCTGATCGCTTCTCTGGCTCCATCCTTGGGAACAAAGCTGCCCTCACCATCACGGGGGCTCAGACAGACGATGAATCTGATTATTACTGTACGCTCTACATGGGTAGTGGCATTTC	ETVVTQEPSLSVSPGGTVTLTCGLSSGSVSTSNYPSWYQQTPGQAPRTLIYSTNTRPSGVPDRFSGSILGNKAALTITGAQTDDESDYYCTLYMGSGI
IGLV9-84*01_S1180_kim	CAGCCTGTGCTGACTCAGCCATCCTCTGCATCGGCCTCCCTGGGAGCCTCGGTCACACTCACCTGCACCCTGAGTAGCGGCTACAGTAATTATGCGGTGGACTGGCACCAGCAGAGACCAGGGAAGGGCCCCCAGTTTGTGATGCGAGTGGGCACAGGTGGGATTGTGGGATCCAAGGGGGATGGCATCCCTGATCGCTTCTCAGGCTCGGGCTCCGGCCTGAATCGGTACCTGACCATCAAGAACATTCAGGAAGAGGATGAGAGTGACTACCACTGTGGGGCAGACCACGGCACTGGGAGCAGCTTCGTGTAACC	QPVLTQPSSASASLGASVTLTCTLSSGYSNYAVDWHQQRPGKGPQFVMRVGTGGIVGSKGDGIPDRFSGSGSGLNRYLTIKNIQEEDESDYHCGADHGTGSSFV*
IGLJ1*01	TTACATCTTCGGTGCTGGGACCCGGCTCACCGTCCTAG	YIFGAGTRLTVL
IGLJ1*01_S4608	TTACATCTTCGGTACTGGGACCCGGCTCACCGTCCTAG	YIFGTGTRLTVL
IGLJ2*01	TGGCTTATTCGGAGGAGGGACCCGGCTGACCGTCCTAG	GLFGGGTRLTVL
IGLJ2*01_S9248	TGGCTTATTCGGAGGAGGGACCCGGCTGACCATCCTAG	GLFGGGTRLTIL
IGLJ2A*01	TTGGGTATTCGGCGGAGGGACCCGGCTGACCGTCCTAG	WVFGGGTRLTVL
IGLJ2A*01_S6837	TTGGGTATTCGGAGGAGGGACCCGGCTGACCGTCCTAG	WVFGGGTRLTVL
IGLJ3*01	TGTGTTATTCGGAGGAGGGACCCGGCTGACCGTCCTAG	VLFGGGTRLTVL
IGLJ3*01_S9314	TGTGTTATTTGGAGGAGGGACCCGGCTGACCGTCCTAG	VLFGGGTRLTVL
IGLJ6*01	TGATGTGTTCGGAAGTGGCACCAAGTTGACCGTCCTCG	DVFGSGTKLTVL
IGLJ6*01_S3351	TGATGTGTTCGGAGGTGGCACCAAGTTGACCGTCCTCG	DVFGGGTKLTVL
IGLJ6*01_S7841	TGATGTGTTCGGAAGTGGCACCAAGTTGACCATCCTCG	DVFGSGTKLTIL
IGLJ7*01	TGTTATGTTCGGAAGAGGCACCAGGCTGACCGACATCG	VMFGRGTRLTDI
IGLJ7*01_S8938	TGTTATGTTCGGAAGAGGCACCAGGCTGACCGTCATCG	VMFGRGTRLTVI
IGLJ7*02	TGTTATGTTGGGAAGAGGCACCAGGCTGACCGTCATCG	VMLGRGTRLTVI
