# Supplementary material for: Multi-compartmental diversification of neutralizing antibody lineages dissected in SARS-CoV-2 spike-immunized macaques
Source: Research Square preprint supplement (doi:10.21203/rs.3.rs-3958951/v1), 2024-02-26
Supplement: Supplementary file 8 [file d6f6f3f328d321912ca6b434.xlsx]

## Sheet: Primers
Primer	Sequence	Master Mix
10X_RM_IGHA_1	ACGTGGCATGTCACGGACTC	1
10X_RM_IGHD_1	CTGGCTGCTTGTCGTGTAGCTG	1
10X_RM_IGHE_1	TGTTGACCTCTTTGTCTGCGG	1
10X_RM_IGHG_1	TTGTCCACCTTGGTGTTGCT	1
10X_RM_IGHM_1	TACTTGCCCCCTCTCAGGACT	1
10X_RM_IGK_1	GTCCTGCTCTGTGACACTCTC	1
10X_RM_IGL_1	GTCTCCACTCCCGCGTTGAC	1
10X_RM_IGHA_2	TTGCTCCAGGTCACGTTGAGTG	2
10X_RM_IGHD_2	CAGGTGACAGTCACGGACTTTG	2
10X_RM_IGHE_2	GGCTGGTAAGGTCATAGTGCTT	2
10X_RM_IGHG_2	AGCCCTGAGGACTGTAGGA	2
10X_RM_IGHM_2	GCATTCTCACAGGAGACGAGG	2
10X_RM_IGK_2	ATTCAGCAGGCACACAACAGAG	2
10X_RM_IGL_2	AGACACACTAGTGTGGCCTTG	2
